# Supplementary material
Source: PubMed Central journal article supplement (PMC7372712)
Supplement: NIHMS1585533-supplement-Tables_1-12__Figures_1-14.pdf [file NIHMS1585533-supplement-Tables_1-12__Figures_1-14.pdf]

Supporting information for

## “Light Absorption of Secondary Organic Aerosol: Composition and Contribution of Nitro-aromatic Compounds”

Mingjie Xie<sup>†,‡,§</sup>, Xi Chen<sup>§</sup>, Michael D. Hays<sup>§</sup>, Michael Lewandowski<sup>†</sup>, John H. Offenberg<sup>†</sup>, Tadeusz E. Kleindienst<sup>†</sup>, Amara L. Holder<sup>§,\*</sup>

<sup>†</sup>School of Environmental Science and Engineering, Nanjing University of Information Science & Technology, Nanjing 210044, China

<sup>‡</sup>Oak Ridge Institute for Science and Education (ORISE), <sup>§</sup>National Risk Management Research Laboratory, <sup>†</sup>National Exposure Research Laboratory, Office of Research and Development, U.S. Environmental Protection Agency, 109 T.W. Alexander Drive, Research Triangle Park, NC 27711, USA

Correspondence to: Amara Holder

E-mail: holder.amara@epa.gov;

Tel: +1 919 541 4635;

Fax: +1 919 541 0554;

Mailing address: 109 T.W. Alexander Dr. RTP, NC, 27709, USA

Table Number: 12

Figure Number: 14

Page number: 50

## **METHODS**

### **1. UV-vis analysis**

A 1.5 cm<sup>2</sup> punch of each filter sample was extracted with 5 mL methanol (HPLC grade, Thermo Fisher Scientific) ultrasonically for 15 min, followed by filtration through a 0.2 μm pore size polytetrafluoroethylene (PTFE) filter head using a glass syringe. The light absorption ( $A_\lambda$ ) of filtered extracts was measured with a UV-vis spectrometer at  $\lambda = 200-900$  nm and resolution of 0.2 nm (V660, Jasco Inc., Easton, MD). This work focused on the light absorption at  $\lambda = 300-550$  nm, where most of the BrC absorption has been observed.<sup>1</sup> A reference cuvette containing methanol was used to eliminate the solvent effect on absorption. In addition, the light absorption of blank filter extract (close to 0) was used for correction. The wavelength accuracy and repeatability were monitored on a monthly basis to ensure the quality of collected data. The wavelength accuracy is less than  $\pm 0.3$  nm and the wavelength repeatability is less than  $\pm 0.05$  nm. Many studies have shown that methanol can extract organic aerosol at very high efficiencies (> 90%), and a large fraction of light absorption in the near-UV and visible range is ascribed to water insoluble organic materials.<sup>1-3</sup> As such, we assumed that the secondary organic aerosol (SOA) in each filter sample was totally dissolved in the methanol extract, of which the light absorption reflected the total light absorption of each sample.

### **2. Calculation of imaginary refractive index**

The optical properties of organic aerosol (OA) is commonly parameterized as complex refractive index ( $m = n - ik$ ) in climate models.<sup>4,5</sup> The real ( $n$ ) and the imaginary ( $k$ ) parts of the refractive index reflect the scattering and absorbing properties, respectively. The imaginary part of the refractive index ( $k$ ) of SOA generated from the chamber experiments were calculated from their spectroscopic data using eq. S1:<sup>6,7</sup>

$$k = \frac{\rho \times \lambda \times \text{Abs}_\lambda}{4 \times \pi \times \text{OM}} = \frac{\rho \times \lambda \times \text{MAE}_\lambda}{4 \times \pi} \quad (\text{S1})$$

where  $\text{Abs}_\lambda$  ( $\text{Mm}^{-1}$ ) is the light absorption coefficient,  $\text{MAE}_\lambda$  ( $\text{m}^2 \text{g}^{-1}$ ) is the bulk mass absorption efficiency, and  $\text{OM}$  ( $\mu\text{g m}^{-3}$ ) is the concentration of SOA and  $\rho$  ( $\text{g cm}^{-3}$ ) is the density of SOA. In this work, the density of SOA is assigned as  $1.2 \text{ g cm}^{-3}$  based on the estimate from Turpin and Lim<sup>8</sup> for organic aerosols.

### 3. HPLC/DAD-Q-ToFMS method

Target compounds separation was fulfilled using a Zorbax Eclipse Plus C18 column ( $2.1 \times 100 \text{ mm}$ ,  $1.8 \mu\text{m}$  particle size, Agilent Technologies) with an injection volume of  $2 \mu\text{L}$  and flow rate of  $0.2 \text{ mL/min}$ . The column temperature was kept at  $40 \text{ }^\circ\text{C}$ , and the gradient separation was conducted with  $0.2\%$  acetic acid (v/v) in water (eluent A) and methanol (eluent B). The concentration of eluent B was  $25\%$  for the first  $3 \text{ min}$ , increased to  $100\%$  from  $3$  to  $10 \text{ min}$ , held at  $100\%$  from  $10$  to  $32 \text{ min}$ , and then decreased back to  $25\%$  from  $32$  to  $37 \text{ min}$ . The DAD monitored absorbance of each sample from  $200$  to  $900 \text{ nm}$  with a step of  $2 \text{ nm}$ . For ease of analysis, we focused on the signal at  $365 \pm 10 \text{ nm}$ , which is a general measure of chromophore components in sample extracts.

The Agilent 6520 series Accurate Mass Q-ToFMS instrument was equipped with a multimode ion source operated under the electrospray ionization (ESI) negative (-) ion mode. The ion source conditions used a  $2000 \text{ V}$  capillary voltage,  $140 \text{ V}$  fragmentor voltage,  $65 \text{ V}$  skimmer voltage,  $300 \text{ }^\circ\text{C}$  gas temperature,  $5 \text{ L min}^{-1}$  drying gas flow rate and  $40 \text{ psig}$  nebulizer. The ESI-Q-ToFMS instrument acquired mass spectra from  $m/z$   $40$  to  $1000$  at rate of  $3 \text{ spectra s}^{-1}$ . At the beginning of each batch analysis, the Q-ToFMS instrument was calibrated by a diluted commercial available tuning mixture (Agilent G1969-85020). The specific ions included in the tuning mixture were  $112.985587$ ,  $301.998139$ ,  $601.978977$ ,  $1033.988109$ ,  $1333.968947$ ,

1633.949786, 1933.930624 and 2233.911463. During the running of each sample, the Q-ToFMS was continuously tuned through the injection of purine and HP-0921 acetate adduct (Agilent G1969-85001). The Mass Hunter Version B.05.01 Build 5.01.5125.3 software was used to acquire the data.

#### 4. MAE<sub>λ</sub> calculation for standard compounds

Methanol solution of standard compounds were diluted in series and analyzed by UV-vis spectrometer (scan from 200 to 900 nm). The UV-vis spectra of standard compounds at around 1 ng μL<sup>-1</sup> are shown in Figure S11. The 3,5-dinitrocatechol, a surrogate standard representing the light-absorbing characteristics of C<sub>6</sub>H<sub>4</sub>N<sub>2</sub>O<sub>6</sub> in the identified compounds, could not be detected with HPLC/DAD-Q-ToFMS using the method in this work, which might be associated with its poor ionization efficiency. As such, it was not used for the quantification of C<sub>6</sub>H<sub>4</sub>N<sub>2</sub>O<sub>6</sub>.

The MAE<sub>λ</sub> (m<sup>2</sup> g<sup>-1</sup>) for each standard compound could be calculated as:

$$\text{MAE}_\lambda = \frac{\text{Abs}_\lambda^*}{C_l} \quad (\text{S2})$$

where Abs<sub>λ</sub><sup>\*</sup> (m<sup>-1</sup>) is the light absorption coefficient of each standard compound in methanol solution; C<sub>l</sub> (ng μL<sup>-1</sup>) is the concentration of each standard compound in methanol solution.

The Abs<sub>λ</sub><sup>\*</sup> could be obtained from the following equation.

$$\text{Abs}_\lambda^* = \frac{(A_\lambda - A_{700}) \times \ln(10)}{L} \quad (\text{S3})$$

Here, A<sub>λ</sub> and A<sub>700</sub> come from the UV-vis spectrometer; L is the optical path length of the quartz cuvette (0.01 m) in the UV-vis spectrometer.

Combining eqs. S2 and S3, A<sub>λ</sub> - A<sub>700</sub> and C<sub>l</sub> are linearly related as:

$$A_\lambda - A_{700} = \text{MAE}_\lambda \times C_l \times \frac{L}{\ln(10)} \quad (\text{S4})$$

For most of the standard compounds, the Beer-Lambert law is valid in the whole concentration range, and the  $MAE_{\lambda}$  could be obtained from the slope of the linear regression between  $A_{\lambda} - A_{700}$  and  $C_l$ .

However, the Beer-Lambert law is not valid for some standard compounds at high concentrations. Interestingly,  $A_{\lambda} - A_{700}$  is still linearly related to  $C_l$ , but the intercept value is not 0. Then eq. S4 could be rewritten as:

$$A_{\lambda} - A_{700} = MAE_{\lambda}' \times C_l \times \frac{L}{\ln(10)} + b \times \frac{L}{\ln(10)} \quad (S5)$$

where  $b \times L / \ln(10)$  ( $m^{-1}$ ) is the intercept; the slope of the linear regression between  $A_{\lambda} - A_{700}$  and  $C_l$  was assumed to be directly related to  $MAE_{\lambda}'$ . The  $MAE_{\lambda}$  values of standard compounds at different concentration ranges and wavelengths were provided in Table S4.

## 5. $Abs_{\lambda}$ attribution for identified compounds

To estimate the contribution of each identified nitro-aromatic compound to the total light absorption of each SOA sample, the  $Abs_{\lambda}$  ( $Mm^{-1}$ ) of each identified compound was calculated using eq.1 of the manuscript.

$$Abs_{\lambda} = (A_{\lambda} - A_{700}) \times \frac{V_l}{V_a \times L} \ln(10) \quad (1)$$

where  $V_l$  ( $m^3$ ) is the volume of methanol (5 mL) used for extraction and  $V_a$  ( $m^3$ ) is the volume of the sampled air.

In the concentration range where the Beer-Lambert law is valid, the  $Abs_{\lambda}$  of each identified compound could be obtained by combining eqs. S4 and 1.

$$Abs_{\lambda} = MAE_{\lambda} \times C_l \times \frac{L}{\ln(10)} \times \frac{V_l}{V_a \times L} \ln(10) = MAE_{\lambda} \times C_a \quad (S6)$$

where  $C_a$  ( $ng\ m^{-3}$ ) is the concentration of identified compounds in the air.

While in the high concentration range of some compounds where the Beer-Lambert law is not valid, the  $Abs_{\lambda}$  of each identified compound could be obtained by combining eqs. S5 and 1.

$$Abs_{\lambda} = (MAE_{\lambda}' \times C_l \times \frac{L}{\ln(10)} + b \times \frac{L}{\ln(10)}) \times \frac{V_l}{V_a \times L} \ln(10) = MAE_{\lambda}' \times C_a + b \times \frac{V_l}{V_a} \quad (S7)$$

For simplicity, only 5 representative wavelength (365, 400, 450, 500, 550 nm) in the range of 300 – 550 nm were selected for  $Abs_{\lambda}$  attribution. The method used for  $Abs_{\lambda}$  attribution in this work presumes that the light absorption of each identified compound in sample extracts is not impacted by other components, which needs to be evaluated in further study.

**Table S1. Summary of experimental conditions and sample information in this work.**

| Experiment ID | Filter ID | VOC type               | Oxidant                       | Humidity (%) | Initial [NO <sub>x</sub> ] ppm | Initial [H <sub>2</sub> O <sub>2</sub> ] ppm | Initial [VOC] ppmC | ΔVOC <sup>a</sup> ppmC | SOA yield         | V (m <sup>3</sup> ) <sup>b</sup> | SOA Conc. <sup>c</sup> (μg m <sup>-3</sup> ) |
|---------------|-----------|------------------------|-------------------------------|--------------|--------------------------------|----------------------------------------------|--------------------|------------------------|-------------------|----------------------------------|----------------------------------------------|
| ER605         | GF2       | α-Pinene               | NO <sub>x</sub>               | 18.5         | 0.25                           | /                                            | 1.61               | 1.35                   | 0.056             | 26.5                             | 31.6                                         |
| ER618         | GF4       | α-Pinene               | NO <sub>x</sub>               | 10.1         | 0.30                           | /                                            | 2.88               | 2.78                   | 0.095             | 18.4                             | 103                                          |
| ER636         | GF2       | α-Pinene               | NO <sub>x</sub>               | 18.4         | 0.20                           | /                                            | 1.43               | 1.21                   | 0.046             | 29.7                             | 22.4                                         |
| ER726         | GF2       | α-Pinene               | NO <sub>x</sub>               | 10.5         | 0.074                          | /                                            | 1.10               | 0.98                   | 0.065             | 22.4                             | 24.4                                         |
| ER606         | GF2       | α-Pinene               | H <sub>2</sub> O <sub>2</sub> | 18.7         | /                              | 6.23                                         | 1.01               | 0.88                   | 0.25              | 26.8                             | 94.8                                         |
| ER620         | GF4       | α-Pinene               | H <sub>2</sub> O <sub>2</sub> | 10.1         | /                              | 2.55                                         | 1.05               | 1.02                   | 0.20              | 18.4                             | 77.1                                         |
| ER633         | GF2       | Isoprene               | NO <sub>x</sub>               | 18.5         | 0.35                           | /                                            | 5.81               | 5.45                   | 0.007             | 29.6                             | 15.2                                         |
| ER728         | GF2       | Isoprene               | NO <sub>x</sub>               | 10.3         | 0.49                           | /                                            | 6.68               | 6.19                   | 0.005             | 19.6                             | 11.0                                         |
| ER729         | GF2       | Isoprene               | NO <sub>x</sub>               | 10.2         | 0.79                           | /                                            | 8.52               | 8.25                   | 0.007             | 16.8                             | 18.7                                         |
| ER629         | GF2       | Isoprene               | H <sub>2</sub> O <sub>2</sub> | 18.6         | /                              | 4.79                                         | 5.45               | 3.67                   | 0.025             | 29.6                             | 38.5                                         |
| ER630         | GF2       | Isoprene               | H <sub>2</sub> O <sub>2</sub> | 18.6         | /                              | 13.6                                         | 2.17               | 1.84                   | 0.040             | 33.3                             | 31.1                                         |
| ER393         | GF2       | β-Caryophyllene        | NO <sub>x</sub>               | 10.2         | 0.21                           | /                                            | 0.45               | 0.35                   | 0.42              | 21.4                             | 57.1                                         |
| ER716         | GF2       | β-Caryophyllene        | NO <sub>x</sub>               | 9.82         | 0.099                          | /                                            | 0.73               | N.A. <sup>d</sup>      | N.A. <sup>d</sup> | 16.8                             | 123                                          |
| ER533         | GF3       | β-Caryophyllene        | H <sub>2</sub> O <sub>2</sub> | 10.2         | /                              | 0.26                                         | 0.39               | 0.39                   | 0.51              | 20.5                             | 81.4                                         |
| ER693         | GF2       | β-Caryophyllene        | H <sub>2</sub> O <sub>2</sub> | 20.7         | /                              | 12.7                                         | 0.51               | 0.49                   | 0.86              | 23.4                             | 180                                          |
| ER538         | GF2       | 1,3,5-Trimethylbenzene | NO <sub>x</sub>               | 15.8         | 0.50                           | /                                            | 4.51               | 3.97                   | 0.016             | 19.0                             | 25.8                                         |
| ER752         | GF5       | 1,3,5-Trimethylbenzene | NO <sub>x</sub>               | 13.1         | 0.36                           | /                                            | 7.56               | 2.80                   | 0.074             | 17.1                             | 82.2                                         |
| ER536         | GF2       | 1,3,5-Trimethylbenzene | H <sub>2</sub> O <sub>2</sub> | 16.0         | /                              | 3.53                                         | 6.41               | 4.91                   | 0.063             | 18.1                             | 128                                          |
| ER536         | GF5       | 1,3,5-Trimethylbenzene | H <sub>2</sub> O <sub>2</sub> | 16.0         | /                              | 1.76                                         | 6.54               | 4.43                   | 0.031             | 18.3                             | 57.3                                         |
| ER388         | GF5       | 1,2,4-Trimethylbenzene | NO <sub>x</sub>               | 10.3         | 0.25                           | /                                            | 12.56              | 7.76                   | 0.020             | 39.4                             | 54.5                                         |
| ER753         | GF5       | 1,2,4-Trimethylbenzene | NO <sub>x</sub>               | 12.1         | 0.39                           | /                                            | 7.13               | 3.20                   | 0.047             | 17.1                             | 58.5                                         |
| ER435         | GF2       | 1,2,4-Trimethylbenzene | H <sub>2</sub> O <sub>2</sub> | 10.2         | /                              | 3.49                                         | 6.09               | 3.74                   | 0.084             | 18.9                             | 117                                          |
| ER435         | GF5       | 1,2,4-Trimethylbenzene | H <sub>2</sub> O <sub>2</sub> | 10.2         | /                              | 6.98                                         | 6.21               | 4.89                   | 0.12              | 18.6                             | 215                                          |
| ER435         | GF8       | 1,2,4-Trimethylbenzene | H <sub>2</sub> O <sub>2</sub> | 10.2         | /                              | 1.74                                         | 6.26               | 3.14                   | 0.050             | 18.9                             | 58.3                                         |

<sup>a</sup> Reacted VOC concentration; <sup>b</sup> filter sample volume; <sup>c</sup> concentrations of SOA based on filter weight change and sample volume; <sup>d</sup> not available; <sup>e</sup> CH<sub>3</sub>ONO was added and the concentration ranged from 0.072 to 0.083 ppmC.

**Table S1. Continue**

| Experiment ID | Filter ID | VOC          | Oxidant                       | Humidity (%) | Initial [NO <sub>x</sub> ] ppm | Initial [H <sub>2</sub> O <sub>2</sub> ] ppm | Initial [VOC] ppmC | ΔVOC <sup>a</sup> ppmC | SOA yield | V (m <sup>3</sup> ) <sup>b</sup> | SOA Conc. <sup>c</sup> (μg m <sup>-3</sup> ) |
|---------------|-----------|--------------|-------------------------------|--------------|--------------------------------|----------------------------------------------|--------------------|------------------------|-----------|----------------------------------|----------------------------------------------|
| ER366         | GF2       | m-Xylene     | NO <sub>x</sub>               | 10.5         | 0.42                           | /                                            | 12.3               | 6.96                   | 0.051     | 17.3                             | 130                                          |
| ER610         | GF2       | m-Xylene     | NO <sub>x</sub>               | 19.0         | 0.27                           | /                                            | 5.27               | 3.28                   | 0.058     | 26.9                             | 69.9                                         |
| ER695         | GF2       | m-Xylene     | NO <sub>x</sub>               | 20.7         | 0.34                           | /                                            | 7.45               | 5.21                   | 0.045     | 23.5                             | 97.3                                         |
| ER751         | GF5       | m-Xylene     | NO <sub>x</sub>               | 12.2         | 0.29                           | /                                            | 5.53               | 3.23                   | 0.059     | 17.1                             | 74.7                                         |
| ER429         | GF6       | m-Xylene     | H <sub>2</sub> O <sub>2</sub> | 14.6         | /                              | 5.85                                         | 5.39               | 2.65                   | 0.11      | 27.3                             | 112                                          |
| ER430         | GF2       | m-Xylene     | H <sub>2</sub> O <sub>2</sub> | 10.2         | /                              | 4.41                                         | 4.86               | 2.45                   | 0.14      | 20.7                             | 118                                          |
| ER430         | GF6       | m-Xylene     | H <sub>2</sub> O <sub>2</sub> | 10.2         | /                              | 4.41                                         | 5.08               | 2.15                   | 0.077     | 18.9                             | 59.9                                         |
| ER612         | GF2       | m-Xylene     | H <sub>2</sub> O <sub>2</sub> | 18.7         | /                              | 2.46                                         | 2.10               | 1.31                   | 0.052     | 26.9                             | 29.2                                         |
| ER613         | GF2       | m-Xylene     | H <sub>2</sub> O <sub>2</sub> | 18.7         | /                              | 2.54                                         | 2.75               | 1.36                   | 0.075     | 26.9                             | 42.1                                         |
| ER634         | GF2       | Toluene      | NO <sub>x</sub>               | 18.9         | 0.32                           | /                                            | 7.11               | 2.82                   | 0.094     | 29.7                             | 109                                          |
| ER634         | GF4       | Toluene      | NO <sub>x</sub>               | 18.9         | 0.32                           | /                                            | 4.98               | 1.86                   | 0.051     | 29.7                             | 39.2                                         |
| ER694         | GF2       | Toluene      | NO <sub>x</sub>               | 19.1         | 0.35                           | /                                            | 5.50               | 2.64                   | 0.051     | 23.5                             | 56.1                                         |
| ER700         | GF2       | Toluene      | NO <sub>x</sub>               | 7.64         | 0.32                           | /                                            | 4.42               | 2.61                   | 0.082     | 14.2                             | 71.5                                         |
| ER701         | GF2       | Toluene      | NO <sub>x</sub>               | 9.73         | 0.30                           | /                                            | 4.55               | 2.41                   | 0.078     | 16.7                             | 72.8                                         |
| ER702         | GF2       | Toluene      | NO <sub>x</sub>               | 8.09         | 0.31                           | /                                            | 4.29               | 2.90                   | 0.090     | 12.3                             | 71.1                                         |
| ER744         | GF2       | Toluene      | NO <sub>x</sub>               | 11.3         | 0.30                           | /                                            | 5.05               | 2.34                   | 0.067     | 17.0                             | 58.9                                         |
| ER745         | GF2       | Toluene      | NO <sub>x</sub>               | 9.44         | 0.19                           | /                                            | 5.13               | 3.19                   | 0.079     | 12.1                             | 70.3                                         |
| ER755         | GF5       | Toluene      | NO <sub>x</sub>               | 12.3         | 0.30                           | /                                            | 6.05               | 2.53                   | 0.12      | 17.1                             | 117                                          |
| ER433         | GF2       | Toluene      | H <sub>2</sub> O <sub>2</sub> | 10.2         | /                              | 6.17                                         | 5.46               | 2.29                   | 0.20      | 18.9                             | 170                                          |
| ER541         | GF2       | Toluene      | H <sub>2</sub> O <sub>2</sub> | 15.8         | /                              | 3.10                                         | 2.18               | 0.97                   | 0.085     | 30.3                             | 33.4                                         |
| ER553         | GF2       | Toluene      | H <sub>2</sub> O <sub>2</sub> | 16.0         | /                              | 11.1                                         | 2.90               | 1.41                   | 0.078     | 21.3                             | 42.8                                         |
| ER772         | GF5       | Toluene      | H <sub>2</sub> O <sub>2</sub> | 11.7         | /                              | 7.92                                         | 6.09               | 1.70                   | 0.16      | 18.3                             | 101                                          |
| ER390         | GF3       | Ethylbenzene | NO <sub>x</sub>               | 10.2         | 0.22                           | /                                            | 11.0               | 3.76                   | 0.056     | 21.4                             | 78.3                                         |
| ER754         | GF8       | Ethylbenzene | NO <sub>x</sub>               | 12.3         | 0.27                           | /                                            | 6.37               | 1.99                   | 0.13      | 17.1                             | 98.5                                         |
| ER759         | GF2       | Ethylbenzene | NO <sub>x</sub>               | 19.1         | 0.23                           | /                                            | 4.08               | 0.82                   | 0.075     | 17.1                             | 26.1                                         |
| ER760         | GF2       | Ethylbenzene | NO <sub>x</sub>               | 11.4         | 0.19                           | /                                            | 3.79               | 1.79                   | 0.11      | 8.60                             | 58.3                                         |
| ER761         | GF2       | Ethylbenzene | NO <sub>x</sub>               | 11.6         | 0.19                           | /                                            | 3.63               | 1.46                   | 0.077     | 14.9                             | 37.9                                         |
| ER762         | GF2       | Ethylbenzene | NO <sub>x</sub>               | 11.8         | 0.20                           | /                                            | 3.62               | 1.09                   | 0.062     | 17.1                             | 25.3                                         |
| ER770         | GF2       | Ethylbenzene | H <sub>2</sub> O <sub>2</sub> | 12.1         | /                              | 7.20                                         | 4.51               | 1.29                   | 0.065     | 17.5                             | 32.3                                         |
| ER770         | GF5       | Ethylbenzene | H <sub>2</sub> O <sub>2</sub> | 12.1         | /                              | 7.20                                         | 4.52               | 1.26                   | 0.047     | 17.5                             | 22.7                                         |
| ER770         | GF8       | Ethylbenzene | H <sub>2</sub> O <sub>2</sub> | 12.1         | /                              | 7.20                                         | 4.53               | 1.35                   | 0.096     | 17.5                             | 51.9                                         |
| ER770         | GF11      | Ethylbenzene | H <sub>2</sub> O <sub>2</sub> | 12.1         | /                              | 7.20                                         | 4.53               | 1.38                   | 0.077     | 17.6                             | 41.4                                         |
| ER773         | GF5       | Ethylbenzene | H <sub>2</sub> O <sub>2</sub> | 11.9         | /                              | 7.83                                         | 4.72               | 1.67                   | 0.14      | 17.5                             | 87.5                                         |



**Table S1. Continue**

| Experiment ID | Filter ID | VOC type             | Oxidant                       | Humidity (%) | Initial [NO <sub>x</sub> ] ppm | Initial [H <sub>2</sub> O <sub>2</sub> ] ppm | Initial [VOC] ppmC | ΔVOC <sup>a</sup> ppmC | SOA yield | V (m <sup>3</sup> ) <sup>b</sup> | SOA Conc. <sup>c</sup> (μg m <sup>-3</sup> ) |
|---------------|-----------|----------------------|-------------------------------|--------------|--------------------------------|----------------------------------------------|--------------------|------------------------|-----------|----------------------------------|----------------------------------------------|
| ER542         | GF2       | Benzene <sup>e</sup> | NO <sub>x</sub>               | 15.5         | 0.27                           | /                                            | 9.00               | 1.55                   | 0.12      | 20.0                             | 74.1                                         |
| ER542         | GF4       | Benzene <sup>e</sup> | NO <sub>x</sub>               | 15.5         | 0.27                           | /                                            | 9.41               | 1.92                   | 0.061     | 30.2                             | 47.2                                         |
| ER543         | GF2       | Benzene <sup>e</sup> | NO <sub>x</sub>               | 15.5         | 0.27                           | /                                            | 7.00               | 1.23                   | 0.041     | 36.3                             | 20.8                                         |
| ER615         | GF2       | Benzene <sup>e</sup> | NO <sub>x</sub>               | 18.5         | 0.25                           | /                                            | 7.44               | 0.97                   | 0.064     | 26.8                             | 25.2                                         |
| ER704         | GF2       | Benzene              | NO <sub>x</sub>               | 25.5         | 0.18                           | /                                            | 8.11               | 1.36                   | 0.087     | 28.2                             | 47.0                                         |
| ER705         | GF2       | Benzene              | NO <sub>x</sub>               | 9.94         | 0.29                           | /                                            | 8.10               | 1.34                   | 0.055     | 19.7                             | 27.4                                         |
| ER756         | GF5       | Benzene              | NO <sub>x</sub>               | 12.2         | 0.28                           | /                                            | 12.7               | 2.82                   | 0.36      | 17.1                             | 383                                          |
| ER763         | GF4       | Benzene              | NO <sub>x</sub>               | 12.0         | 0.18                           | /                                            | 12.7               | 2.21                   | 0.16      | 17.1                             | 136                                          |
| ER544         | GF2       | Benzene              | H <sub>2</sub> O <sub>2</sub> | 15.5         | /                              | 2.89                                         | 3.97               | 0.94                   | 0.075     | 35.1                             | 28.2                                         |
| ER614         | GF2       | Benzene              | H <sub>2</sub> O <sub>2</sub> | 18.5         | /                              | 4.44                                         | 4.67               | 0.73                   | 0.055     | 26.9                             | 16.6                                         |
| ER706         | GF2       | Benzene              | H <sub>2</sub> O <sub>2</sub> | 10.3         | /                              | 9.43                                         | 9.34               | 2.78                   | 0.064     | 20.2                             | 66.7                                         |
| ER771         | GF2       | Benzene              | H <sub>2</sub> O <sub>2</sub> | 11.7         | /                              | 6.98                                         | 8.01               | 1.61                   | 0.063     | 18.2                             | 26.7                                         |
| ER771         | GF5       | Benzene              | H <sub>2</sub> O <sub>2</sub> | 11.7         | /                              | 6.98                                         | 8.00               | 1.54                   | 0.046     | 17.4                             | 24.2                                         |
| ER703         | GF2       | Napthalene           | NO <sub>x</sub>               | 19.3         | 0.25                           | /                                            | 0.75               | 0.49                   | 0.11      | 23.3                             | 20.8                                         |
| ER730         | GF3       | Napthalene           | NO <sub>x</sub>               | 10.3         | 0.28                           | /                                            | 0.67               | 0.35                   | 0.29      | 22.4                             | 38.3                                         |
| ER767         | GF5       | Napthalene           | NO <sub>x</sub>               | 11.8         | 0.21                           | /                                            | 1.31               | 0.46                   | 0.41      | 17.1                             | 70.5                                         |
| ER460         | GF5       | Napthalene           | H <sub>2</sub> O <sub>2</sub> | 15.3         | /                              | 2.12                                         | 0.81               | 0.66                   | 0.38      | 20.3                             | 106                                          |
| ER774         | GF2       | Napthalene           | H <sub>2</sub> O <sub>2</sub> | 11.8         | /                              | 8.05                                         | 1.57               | 1.16                   | 0.39      | 17.2                             | 173                                          |
| ER774         | GF5       | Napthalene           | H <sub>2</sub> O <sub>2</sub> | 11.8         | /                              | 8.05                                         | 1.57               | 1.18                   | 0.37      | 17.2                             | 164                                          |
| ER707         | GF3       | m-Cresol             | NO <sub>x</sub>               | 10.2         | 0.27                           | /                                            | 1.65               | 1.22                   | 0.18      | 17.2                             | 83.7                                         |
| ER713         | GF3       | m-Cresol             | NO <sub>x</sub>               | 10.4         | 0.11                           | /                                            | 2.97               | 1.44                   | 0.73      | 16.2                             | 479                                          |
| ER749         | GF5       | m-Cresol             | NO <sub>x</sub>               | 12.6         | 0.087                          | /                                            | 0.71               | 0.66                   | 0.29      | 17.1                             | 85.8                                         |
| ER776         | GF2       | m-Cresol             | H <sub>2</sub> O <sub>2</sub> | 11.6         | /                              | 10.1                                         | 0.22               | 0.19                   | 0.65      | 17.0                             | 54.0                                         |
| ER776         | GF5       | m-Cresol             | H <sub>2</sub> O <sub>2</sub> | 11.6         | /                              | 10.1                                         | 0.22               | 0.19                   | 0.62      | 17.2                             | 52.7                                         |

**Table S2 Identified nitrogen-aromatic compounds by HPLC/ESI-Q-ToFMS from the oxidation of VOCs studied in this work.**

| Suggested Formula                             | Theoretical m/z<br>[M-H] <sup>-</sup> | Measured m/z<br>[M-H] <sup>-</sup> | Proposed structure <sup>a</sup>                                                      | Quantified as <sup>b</sup>                                                                                                                                                | Absorbing as <sup>c</sup>                                                                                                                                                 |
|-----------------------------------------------|---------------------------------------|------------------------------------|--------------------------------------------------------------------------------------|---------------------------------------------------------------------------------------------------------------------------------------------------------------------------|---------------------------------------------------------------------------------------------------------------------------------------------------------------------------|
| C <sub>6</sub> H <sub>5</sub> NO <sub>3</sub> | 138.0196                              | 138.0199                           | 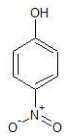   | <br>4-Nitrophenol (C <sub>6</sub> H <sub>5</sub> NO <sub>3</sub> )                     | <br>4-Nitrophenol (C <sub>6</sub> H <sub>5</sub> NO <sub>3</sub> )                     |
| C <sub>7</sub> H <sub>7</sub> NO <sub>3</sub> | 152.0353                              | 152.0345                           |    | <br>2-Methyl-4-nitrophenol (C <sub>7</sub> H <sub>7</sub> NO <sub>3</sub> )            | <br>2-Methyl-4-nitrophenol (C <sub>7</sub> H <sub>7</sub> NO <sub>3</sub> )            |
| C <sub>6</sub> H <sub>5</sub> NO <sub>4</sub> | 154.0145                              | 154.0146                           |    | <br>4-Nitrocatechol (C <sub>6</sub> H <sub>5</sub> NO <sub>4</sub> )                   | <br>4-Nitrocatechol (C <sub>6</sub> H <sub>5</sub> NO <sub>4</sub> )                   |
| C <sub>7</sub> H <sub>7</sub> NO <sub>4</sub> | 168.0302                              | 168.0300                           |    | <br>2-Methyl-4-nitroresorcinol<br>(C <sub>7</sub> H <sub>7</sub> NO <sub>4</sub> )     | <br>2-Methyl-4-nitroresorcinol<br>(C <sub>7</sub> H <sub>7</sub> NO <sub>4</sub> )     |
| C <sub>6</sub> H <sub>5</sub> NO <sub>5</sub> | 170.0095                              | 170.0094                           |   | <br>2-Nitrochloroglucinol (C <sub>6</sub> H <sub>5</sub> NO <sub>5</sub> )            | <br>2-Nitrochloroglucinol (C <sub>6</sub> H <sub>5</sub> NO <sub>5</sub> )            |
| C <sub>8</sub> H <sub>7</sub> NO <sub>4</sub> | 180.0302                              | 180.0307                           |  | <br>2-Methyl-5-nitrobenzoic acid<br>(C <sub>8</sub> H <sub>7</sub> NO <sub>4</sub> ) | <br>2-Methyl-5-nitrobenzoic acid<br>(C <sub>8</sub> H <sub>7</sub> NO <sub>4</sub> ) |

<sup>a</sup> Only one isomer of each formula was proposed for simplicity; <sup>b</sup> standard compounds used for the quantification of identified nitro-aromatic compounds; <sup>c</sup> standard compounds used to estimate the light absorption of quantified nitro-aromatic compounds.

**Table S2. Continue.**

| Suggested Formula                              | Theoretical m/z<br>[M-H] <sup>-</sup> | Measured m/z<br>[M-H] <sup>-</sup> | Proposed structure                                                                   | Quantified as                                                                                                                                                                | Absorbing as                                                                                                                                                                 |
|------------------------------------------------|---------------------------------------|------------------------------------|--------------------------------------------------------------------------------------|------------------------------------------------------------------------------------------------------------------------------------------------------------------------------|------------------------------------------------------------------------------------------------------------------------------------------------------------------------------|
| C <sub>7</sub> H <sub>5</sub> NO <sub>5</sub>  | 182.0095                              | 182.0098                           | 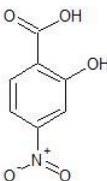   | <br>2-Methyl-5-nitrobenzoic acid<br>(C <sub>8</sub> H <sub>7</sub> NO <sub>4</sub> )      | <br>2-Methyl-5-nitrobenzoic acid<br>(C <sub>8</sub> H <sub>7</sub> NO <sub>4</sub> )      |
| C <sub>8</sub> H <sub>9</sub> NO <sub>4</sub>  | 182.0459                              | 182.0454                           |    | <br>2-Methyl-4-nitroresorcinol<br>(C <sub>7</sub> H <sub>7</sub> NO <sub>4</sub> )        | <br>2-Methyl-4-nitroresorcinol<br>(C <sub>7</sub> H <sub>7</sub> NO <sub>4</sub> )        |
| C <sub>7</sub> H <sub>7</sub> NO <sub>5</sub>  | 184.0253                              | 184.0255                           |    | <br>2-Nitrophenol (C <sub>6</sub> H <sub>5</sub> NO <sub>3</sub> )                        | <br>2-Nitrophenol (C <sub>6</sub> H <sub>5</sub> NO <sub>3</sub> )                        |
| C <sub>10</sub> H <sub>7</sub> NO <sub>3</sub> | 188.0353                              | 188.0354                           |    | <br>2-Nitro-1-naphthol (C <sub>10</sub> H <sub>7</sub> NO <sub>3</sub> )                  | <br>2-Nitro-1-naphthol (C <sub>10</sub> H <sub>7</sub> NO <sub>3</sub> )                  |
| C <sub>9</sub> H <sub>9</sub> NO <sub>4</sub>  | 194.0458                              | 194.0459                           |  | <br>2,5-Dimethyl-4-nitrobenzoic acid<br>(C <sub>9</sub> H <sub>9</sub> NO <sub>4</sub> ) | <br>2,5-Dimethyl-4-nitrobenzoic acid<br>(C <sub>9</sub> H <sub>9</sub> NO <sub>4</sub> ) |
| C <sub>8</sub> H <sub>9</sub> NO <sub>5</sub>  | 198.0407                              | 198.0412                           |  | <br>2-Nitrophenol (C <sub>6</sub> H <sub>5</sub> NO <sub>3</sub> )                      | <br>2-Nitrophenol (C <sub>6</sub> H <sub>5</sub> NO <sub>3</sub> )                      |

**Table S2. Continue**

| Suggested Formula                                           | Theoretical m/z<br>[M-H] <sup>-</sup> | Measured m/z<br>[M-H] <sup>-</sup> | Proposed structure                                                                 | Quantified as                                                                                                                                                                           | Absorbing as                                                                                                                                                                         |
|-------------------------------------------------------------|---------------------------------------|------------------------------------|------------------------------------------------------------------------------------|-----------------------------------------------------------------------------------------------------------------------------------------------------------------------------------------|--------------------------------------------------------------------------------------------------------------------------------------------------------------------------------------|
| C <sub>6</sub> H <sub>4</sub> N <sub>2</sub> O <sub>6</sub> | 198.9997                              | 198.9994                           | 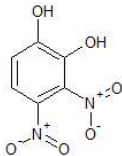 | <br>4,6-Dinitro-2-methylresorcinol<br>(C <sub>7</sub> H <sub>6</sub> N <sub>2</sub> O <sub>6</sub> ) | <br>3,5-Dinitroresorcinol<br>(C <sub>6</sub> H <sub>4</sub> N <sub>2</sub> O <sub>6</sub> )       |
| C <sub>10</sub> H <sub>7</sub> NO <sub>4</sub>              | 204.0302                              | 204.0300                           |  | <br>2-Nitro-1-naphthol (C <sub>10</sub> H <sub>7</sub> NO <sub>3</sub> )                             | <br>2-Nitro-1-naphthol<br>(C <sub>10</sub> H <sub>7</sub> NO <sub>3</sub> )                       |
| C <sub>7</sub> H <sub>6</sub> N <sub>2</sub> O <sub>6</sub> | 213.0157                              | 213.0149                           |  | <br>4,6-Dinitro-2-methylresorcinol<br>(C <sub>7</sub> H <sub>6</sub> N <sub>2</sub> O <sub>6</sub> ) | <br>4,6-Dinitro-2-methylresorcinol (C <sub>7</sub> H <sub>6</sub> N <sub>2</sub> O <sub>6</sub> ) |

**Table S3 Recoveries and method detection limit (MDL) for standard compounds used for quantification.**

| Standard compounds               | Formula                                                     | <i>m/z</i> , [M-H] <sup>-</sup> | Recovery ( <i>N</i> <sup>a</sup> = 4, %) | Detection Limit (pg) |
|----------------------------------|-------------------------------------------------------------|---------------------------------|------------------------------------------|----------------------|
| 4-Nitrophenol                    | C <sub>6</sub> H <sub>5</sub> NO <sub>3</sub>               | 138.0196                        | 97.7 ± 0.92 <sup>b</sup>                 | 4.25                 |
| 2-Methyl-4-nitrophenol           | C <sub>7</sub> H <sub>7</sub> NO <sub>3</sub>               | 152.0353                        | 97.0 ± 0.78                              | 2.31                 |
| 4-Nitrocatechol                  | C <sub>6</sub> H <sub>5</sub> NO <sub>4</sub>               | 154.0145                        | 75.1 ± 0.48                              | 4.79                 |
| 2,6-Dimethyl-4-nitrophenol       | C <sub>8</sub> H <sub>9</sub> NO <sub>3</sub>               | 166.0510                        | 100 ± 2.76                               | 3.74                 |
| 2-Methyl-4-nitroresocinol        | C <sub>7</sub> H <sub>7</sub> NO <sub>4</sub>               | 168.0302                        | 105 ± 2.52                               | 0.70                 |
| 2-Nitrofloroglucinol             | C <sub>6</sub> H <sub>5</sub> NO <sub>5</sub>               | 170.0095                        | 92.9 ± 7.10                              | 2.55                 |
| 2-Methyl-5-nitrobenzoic acid     | C <sub>8</sub> H <sub>7</sub> NO <sub>4</sub>               | 180.0302                        | 106 ± 6.08                               | 14.7                 |
| 2-Nitro-1-naphthol               | C <sub>10</sub> H <sub>7</sub> NO <sub>3</sub>              | 188.0353                        | 90.6 ± 6.56                              | 16.1                 |
| 2,5-dimethyl-4-nitrobenzoic acid | C <sub>9</sub> H <sub>9</sub> NO <sub>4</sub>               | 194.0458                        | 116 ± 4.52                               | 17.6                 |
| 4,6-Dinitro-2-methylresocinol    | C <sub>7</sub> H <sub>6</sub> N <sub>2</sub> O <sub>6</sub> | 213.0157                        | 113 ± 8.18                               | 2.02                 |

<sup>a</sup> Number of repetition; <sup>b</sup> mean ± standard deviation.

**Table S4. Characteristics of linear regression between  $A_\lambda - A_{700}$  and concentration of standard compounds.**

| Compounds                  | Formula                                       | m/z,<br>[M-H] <sup>-</sup> | $\lambda$ (nm) | Linear regression 1 (intercept = 0)               |                                                    |      | Linear regression 2 (intercept $\neq$ 0) |                                       |                |      |
|----------------------------|-----------------------------------------------|----------------------------|----------------|---------------------------------------------------|----------------------------------------------------|------|------------------------------------------|---------------------------------------|----------------|------|
|                            |                                               |                            |                | Conc. range (ng $\mu\text{L}^{-1}$ ) <sup>a</sup> | MAE (m <sup>2</sup> g <sup>-1</sup> ) <sup>b</sup> | r    | Conc. range (ng $\mu\text{L}^{-1}$ )     | MAE (m <sup>2</sup> g <sup>-1</sup> ) | b <sup>d</sup> | r    |
| 4-Nitrophenol              | C <sub>6</sub> H <sub>5</sub> NO <sub>3</sub> | 138.0196                   | 365            | < = 4.28                                          | 2.44                                               | 1.00 |                                          |                                       |                |      |
|                            |                                               |                            | 400            | < = 1.07                                          | 0.71                                               | 0.94 |                                          |                                       |                |      |
|                            |                                               |                            | 450            | / <sup>c</sup>                                    | /                                                  | /    |                                          |                                       |                |      |
|                            |                                               |                            | 500            | /                                                 | /                                                  | /    |                                          |                                       |                |      |
|                            |                                               |                            | 550            | /                                                 | /                                                  | /    |                                          |                                       |                |      |
| 2-Methyl-4-nitrophenol     | C <sub>7</sub> H <sub>7</sub> NO <sub>3</sub> | 152.0353                   | 365            | < = 4.76                                          | 3.15                                               | 1.00 |                                          |                                       |                |      |
|                            |                                               |                            | 400            | < = 1.19                                          | 0.53                                               | 0.71 |                                          |                                       |                |      |
|                            |                                               |                            | 450            | /                                                 | /                                                  | /    |                                          |                                       |                |      |
|                            |                                               |                            | 500            | /                                                 | /                                                  | /    |                                          |                                       |                |      |
|                            |                                               |                            | 550            | /                                                 | /                                                  | /    |                                          |                                       |                |      |
| 4-Nitrocatechol            | C <sub>6</sub> H <sub>5</sub> NO <sub>4</sub> | 154.0145                   | 365            | < = 11.4                                          | 7.02                                               | 1.00 |                                          |                                       |                |      |
|                            |                                               |                            | 400            | < 0.29                                            | 6.95                                               | 0.99 | > = 0.29 and < = 11.4                    | 2.39                                  | 1.61           | 1.00 |
|                            |                                               |                            | 450            | < 0.29                                            | 4.97                                               | 0.99 | > = 0.29 and < = 11.4                    | 1.11                                  | 1.36           | 1.00 |
|                            |                                               |                            | 500            | < 0.29                                            | 1.34                                               | 0.75 | > = 0.29 and < = 11.4                    | 0.18                                  | 0.21           | 0.96 |
|                            |                                               |                            | 550            | /                                                 | /                                                  | /    |                                          |                                       |                |      |
| 2,6-Dimethyl-4-nitrophenol | C <sub>8</sub> H <sub>9</sub> NO <sub>3</sub> | 166.0510                   | 365            | < = 4.00                                          | 3.20                                               | 1.00 |                                          |                                       |                |      |
|                            |                                               |                            | 400            | < = 4.00                                          | 0.51                                               | 0.99 |                                          |                                       |                |      |
|                            |                                               |                            | 450            | /                                                 | /                                                  | /    |                                          |                                       |                |      |
|                            |                                               |                            | 500            | /                                                 | /                                                  | /    |                                          |                                       |                |      |
|                            |                                               |                            | 550            | /                                                 | /                                                  | /    |                                          |                                       |                |      |
| 2-Methyl-4-nitroresorcinol | C <sub>7</sub> H <sub>7</sub> NO <sub>4</sub> | 168.0302                   | 365            | < = 33.3                                          | 12.9                                               | 1.00 |                                          |                                       |                |      |
|                            |                                               |                            | 400            | < 1.11                                            | 4.49                                               | 0.99 | > = 1.11 and < = 33.3                    | 2.23                                  | 4.40           | 1.00 |
|                            |                                               |                            | 450            | < 1.11                                            | 1.20                                               | 0.97 | > = 1.11 and < = 33.3                    | 0.30                                  | 1.77           | 0.97 |
|                            |                                               |                            | 500            | /                                                 | /                                                  | /    |                                          |                                       |                |      |
|                            |                                               |                            | 550            | /                                                 | /                                                  | /    |                                          |                                       |                |      |
| 2-Nitrophenol              | C <sub>6</sub> H <sub>5</sub> NO <sub>5</sub> | 170.0095                   | 365            | < = 3.72                                          | 14.0                                               | 1.00 |                                          |                                       |                |      |
|                            |                                               |                            | 400            | < 0.93                                            | 14.1                                               | 1.00 | > = 0.93 and < = 3.72                    | 7.39                                  | 6.56           | 1.00 |
|                            |                                               |                            | 450            | < 0.93                                            | 1.61                                               | 0.99 | > = 0.93 and < = 3.72                    | 0.87                                  | 0.78           | 1.00 |
|                            |                                               |                            | 500            | /                                                 | /                                                  | /    |                                          |                                       |                |      |
|                            |                                               |                            | 550            | /                                                 | /                                                  | /    |                                          |                                       |                |      |

<sup>a</sup> Concentration ranges for linear relationship; <sup>b</sup> equals to slope  $\times \ln(10) \times 100$ ; <sup>c</sup> No absorption was observed at these wavelengths; <sup>d</sup> equals to intercept  $\times \ln(10) \times 100$ .

**Table S4. Continue**

| Compounds                        | Formula                                    | MW       | $\lambda$ (nm) | Linear regression 1 (intercept = 0)  |                                    |      | Linear regression 2 (intercept $\neq$ 0) |                                    |      |      |
|----------------------------------|--------------------------------------------|----------|----------------|--------------------------------------|------------------------------------|------|------------------------------------------|------------------------------------|------|------|
|                                  |                                            |          |                | Conc. range (ng $\mu\text{L}^{-1}$ ) | MAE ( $\text{m}^2 \text{g}^{-1}$ ) | $r$  | Conc. range (ng $\mu\text{L}^{-1}$ )     | MAE ( $\text{m}^2 \text{g}^{-1}$ ) | $b$  | $r$  |
| 2-Methyl-5-nitrobenzoic acid     | $\text{C}_8\text{H}_7\text{NO}_4$          | 180.0302 | 365            | $\leq 2.14$                          | 0.35                               | 0.93 |                                          |                                    |      |      |
|                                  |                                            |          | 400            | /                                    | /                                  | /    |                                          |                                    |      |      |
|                                  |                                            |          | 450            | /                                    | /                                  | /    |                                          |                                    |      |      |
|                                  |                                            |          | 500            | /                                    | /                                  | /    |                                          |                                    |      |      |
|                                  |                                            |          | 550            | /                                    | /                                  | /    |                                          |                                    |      |      |
| 2-Nitro-1-naphthol               | $\text{C}_{10}\text{H}_7\text{NO}_3$       | 188.0353 | 365            | $\leq 4.64$                          | 3.75                               | 1.00 |                                          |                                    |      |      |
|                                  |                                            |          | 400            | $\leq 4.64$                          | 6.17                               | 1.00 |                                          |                                    |      |      |
|                                  |                                            |          | 450            | $\leq 4.64$                          | 2.33                               | 1.00 |                                          |                                    |      |      |
|                                  |                                            |          | 500            | $< 1.16$                             | 0.39                               | 0.97 | $> = 1.16$ and $\leq 4.64$               | 0.18                               | 0.25 | 0.99 |
|                                  |                                            |          | 550            | /                                    | /                                  | /    |                                          |                                    |      |      |
| 2,5-dimethyl-4-nitrobenzoic acid | $\text{C}_9\text{H}_9\text{NO}_4$          | 194.0458 | 365            | $\leq 3.64$                          | 0.39                               | 0.99 |                                          |                                    |      |      |
|                                  |                                            |          | 400            | /                                    | /                                  | /    |                                          |                                    |      |      |
|                                  |                                            |          | 450            | /                                    | /                                  | /    |                                          |                                    |      |      |
|                                  |                                            |          | 500            | /                                    | /                                  | /    |                                          |                                    |      |      |
|                                  |                                            |          | 550            | /                                    | /                                  | /    |                                          |                                    |      |      |
| 3,5-Dinitrocatechol              | $\text{C}_6\text{H}_4\text{N}_2\text{O}_6$ | 198.9997 | 365            | $\leq 4.28$                          | 6.54                               | 1.00 |                                          |                                    |      |      |
|                                  |                                            |          | 400            | $\leq 4.28$                          | 7.00                               | 0.99 |                                          |                                    |      |      |
|                                  |                                            |          | 450            | $\leq 4.28$                          | 2.74                               | 1.00 |                                          |                                    |      |      |
|                                  |                                            |          | 500            | $\leq 4.28$                          | 0.58                               | 0.98 |                                          |                                    |      |      |
|                                  |                                            |          | 550            | $\leq 4.28$                          | 0.21                               | 0.96 |                                          |                                    |      |      |
| 4,6-Dinitro-2-methylresorcinol   | $\text{C}_7\text{H}_6\text{N}_2\text{O}_6$ | 213.0153 | 365            | $\leq 1.82$                          | 7.05                               | 1.00 |                                          |                                    |      |      |
|                                  |                                            |          | 400            | $\leq 1.82$                          | 11.4                               | 1.00 |                                          |                                    |      |      |
|                                  |                                            |          | 450            | $\leq 1.82$                          | 6.29                               | 1.00 |                                          |                                    |      |      |
|                                  |                                            |          | 500            | $\leq 1.82$                          | 0.32                               | 0.97 |                                          |                                    |      |      |
|                                  |                                            |          | 550            | /                                    | /                                  | /    |                                          |                                    |      |      |

**Table S5. Summary of average bulk MAE,  $k$  and  $\dot{A}_a$  values of SOA extracts and their ranges for different chamber experiments.**

| $\lambda$ (nm)    | $\alpha$ -Pinene                                |                                           | Isoprene                        |                                           | $\beta$ -Caryophyllene              |                                           |
|-------------------|-------------------------------------------------|-------------------------------------------|---------------------------------|-------------------------------------------|-------------------------------------|-------------------------------------------|
|                   | NO <sub>x</sub> ( $N = 4$ )                     | H <sub>2</sub> O <sub>2</sub> ( $N = 2$ ) | NO <sub>x</sub> ( $N = 3$ )     | H <sub>2</sub> O <sub>2</sub> ( $N = 2$ ) | NO <sub>x</sub> ( $N = 2$ )         | H <sub>2</sub> O <sub>2</sub> ( $N = 2$ ) |
|                   | <b>MAE</b>                                      |                                           |                                 |                                           |                                     |                                           |
| 365               | 0.026 ± 0.0058 <sup>a</sup><br>(0.023 – 0.033)  | 0.019 ± 0.0023<br>(0.017 – 0.022)         | NA                              | NA                                        | 0.010 ± 0.0092<br>(0.0010 – 0.019)  | 0.029 ± 0.011<br>(0.011 – 0.032)          |
| 400               | 0.018 ± 0.0071<br>(0.014 – 0.027)               | 0.0082 ± 0.0006<br>(0.076 – 0.0088)       | NA                              | NA                                        | NA                                  | 0.015 ± 0.0088<br>(0.0067 – 0.024)        |
| 450               | 0.0057 ± 0.0039<br>(0.0036 – 0.0098)            | 0.0037 ± 0.0005<br>(0.031 – 0.0042)       | NA                              | NA                                        | NA                                  | 0.0090 ± 0.0080<br>(0.0010 – 0.017)       |
| 500               | NA <sup>b</sup>                                 | NA                                        | NA                              | NA                                        | NA                                  | 0.0076 ± 0.011<br>(0.0000 – 0.015)        |
| 550               | NA                                              | NA                                        | NA                              | NA                                        | NA                                  | 0.0045 ± 0.0044<br>(0.0001 – 0.0089)      |
|                   | <b><math>k</math></b>                           |                                           |                                 |                                           |                                     |                                           |
| 365               | 0.0009 ± 0.0002<br>(0.0008 – 0.0011)            | 0.0007 ± 0.0001<br>(0.0006 – 0.0008)      | NA                              | NA                                        | 0.0004 ± 0.0003<br>(0.0000 – 0.007) | 0.0008 ± 0.0004<br>(0.0004 – 0.0011)      |
| 400               | 0.0007 ± 0.0003<br>(0.0005 – 0.0010)            | 0.0003 ± 0.0000<br>(0.0003 – 0.0003)      | NA                              | NA                                        | NA                                  | 0.0006 ± 0.0003<br>(0.0003 – 0.0009)      |
| 450               | 0.0002 ± 0.0002<br>(0.0002 – 0.0004)            | 0.0002 ± 0.0000<br>(0.0001 – 0.0002)      | NA                              | NA                                        | NA                                  | 0.0004 ± 0.0003<br>(0.0000 – 0.0007)      |
| 500               | NA                                              | NA                                        | NA                              | NA                                        | NA                                  | 0.0004 ± 0.0004<br>(0.0000 – 0.0007)      |
| 550               | NA                                              | NA                                        | NA                              | NA                                        | NA                                  | 0.0002 ± 0.0002<br>(0.0000 – 0.0005)      |
|                   | <b>Absorption Angstrom Exponent calculation</b> |                                           |                                 |                                           |                                     |                                           |
| $\dot{A}_a$       | 15.3 ± 16.2<br>(8.51 – 39.5)                    | 8.91 ± 0.19<br>(8.72 – 9.10)              | 33.0 ± 50.7<br>(2.73 – 91.5)    | 3.41 ± 0.68<br>(2.73 – 4.09)              | 14.8 ± 5.64<br>(9.15 – 20.4)        | 7.08 ± 3.66<br>(3.43 – 10.7)              |
| $r$               | -0.82 ± 0.19 <sup>c</sup><br>(-0.88 – -0.55)    | -0.92 ± 0.024<br>(-0.94 – -0.89)          | -0.47 ± 0.21<br>(-0.68 – -0.24) | -0.57 ± 0.11<br>(-0.68 – -0.46)           | -0.89 ± 0.06<br>(-0.95 – -0.83)     | -0.96 ± 0.01<br>(-0.97 – -0.95)           |
| % NA <sup>d</sup> | 36.9 ± 43.1<br>(25.2 – 97.1)                    | 16.9 ± 0.16<br>(16.7 – 17.2)              | 50.6 ± 42.3<br>(20.7 – 99.0)    | 84.6 ± 6.20<br>(78.4 – 90.8)              | 47.2 ± 26.2<br>(21.2 – 73.2)        | 14.0 ± 14.0<br>(0.00 – 28.0)              |

<sup>a</sup> For sample number  $N > 2$ , represent mean ± standard deviation; for sample number  $N = 2$ , represent mean ± difference/2; <sup>b</sup> 0 or very small negative values (close to 0) were obtained for these measurements; <sup>c</sup> correlation coefficients for the linear regression between  $\log(\text{Abs}_\lambda)$  and  $\log(\lambda)$ ,  $\lambda$  ranges from 300 to 550 nm; <sup>d</sup> represent the percentage of  $A_\lambda$ - $A_{700}$  measurements with small negative values (close to 0) in the  $\lambda$  range of 300 to 550 nm; <sup>e</sup> significant difference ( $p < 0.05$ ) has been observed for MAE values at 365 nm between NO<sub>x</sub> and H<sub>2</sub>O<sub>2</sub> conditions.



**Table S5. Continue**

|                | 1,3,5-Trimethylbenzene                          |                                       | 1,2,4-Trimethylbenzene               |                                       | <i>m</i> -Xylene                     |                                       | Toluene <sup>e</sup>                 |                                       |
|----------------|-------------------------------------------------|---------------------------------------|--------------------------------------|---------------------------------------|--------------------------------------|---------------------------------------|--------------------------------------|---------------------------------------|
|                | NO <sub>x</sub> (N = 2)                         | H <sub>2</sub> O <sub>2</sub> (N = 2) | NO <sub>x</sub> (N = 2)              | H <sub>2</sub> O <sub>2</sub> (N = 3) | NO <sub>x</sub> (N = 4)              | H <sub>2</sub> O <sub>2</sub> (N = 5) | NO <sub>x</sub> (N = 9)              | H <sub>2</sub> O <sub>2</sub> (N = 4) |
| λ (nm)         | <b>MAE</b>                                      |                                       |                                      |                                       |                                      |                                       |                                      |                                       |
| 365            | NA                                              | 0.030 ± 0.019<br>(0.011 – 0.049)      | 0.17 ± 0.072<br>(0.094 – 0.24)       | 0.088 ± 0.018<br>(0.071 – 0.11)       | 0.12 ± 0.048<br>(0.094 – 0.19)       | 0.079 ± 0.016<br>(0.063 – 0.10)       | 0.55 ± 0.17<br>(0.39 – 0.96)         | 0.17 ± 0.051<br>(0.11 – 0.23)         |
| 400            | NA                                              | NA                                    | 0.082 ± 0.04<br>(0.042 – 0.12)       | 0.036 ± 0.0088<br>(0.027 – 0.45)      | 0.054 ± 0.023<br>(0.041 – 0.088)     | 0.033 ± 0.012<br>(0.021 – 0.052)      | 0.31 ± 0.093<br>(0.22 – 0.53)        | 0.089 ± 0.031<br>(0.051 – 0.12)       |
| 450            | NA                                              | NA                                    | 0.032 ± 0.019<br>(0.013 – 0.051)     | 0.0065 ± 0.0029<br>(0.0042 – 0.0097)  | 0.014 ± 0.0071<br>(0.0091 – 0.024)   | 0.010 ± 0.010<br>(0.0014 – 0.027)     | 0.13 ± 0.036<br>(0.099 – 0.22)       | 0.033 ± 0.012<br>(0.016 – 0.042)      |
| 500            | NA                                              | NA                                    | 0.014 ± 0.0086<br>(0.0049 – 0.022)   | NA                                    | 0.0038 ± 0.0034<br>(0.0011 – 0.0085) | 0.0057 ± 0.0050<br>(0.0012 – 0.011)   | 0.052 ± 0.015<br>(0.035 – 0.085)     | 0.015 ± 0.0061<br>(0.0077 – 0.022)    |
| 550            | NA                                              | NA                                    | 0.0043 ± 0.0030<br>(0.013 – 0.73)    | NA                                    | 0.0027 ± 0.0015<br>(0.0012 – 0.0042) | 0.0050 ± 0.0052<br>(0.0006 – 0.011)   | 0.021 ± 0.0091<br>(0.0074 – 0.039)   | 0.0062 ± 0.0020<br>(0.0033 – 0.0076)  |
|                | <b>K</b>                                        |                                       |                                      |                                       |                                      |                                       |                                      |                                       |
| 365            | NA                                              | 0.0010 ± 0.0007<br>(0.0004 – 0.0017)  | 0.0058 ± 0.0025<br>(0.0033 – 0.0083) | 0.0031 ± 0.0006<br>(0.0025 – 0.0037)  | 0.0042 ± 0.0017<br>(0.0033 – 0.0067) | 0.0028 ± 0.0006<br>(0.0022 – 0.0035)  | 0.019 ± 0.0061<br>(0.014 – 0.034)    | 0.0060 ± 0.0018<br>(0.0038 – 0.0080)  |
| 400            | NA                                              | NA                                    | 0.0031 ± 0.0015<br>(0.0016 – 0.0046) | 0.0014 ± 0.0003<br>(0.0010 – 0.0017)  | 0.0021 ± 0.0009<br>(0.0016 – 0.0033) | 0.0013 ± 0.0005<br>(0.0008 – 0.0020)  | 0.012 ± 0.0035<br>(0.0086 – 0.020)   | 0.0034 ± 0.0012<br>(0.0019 – 0.0048)  |
| 450            | NA                                              | NA                                    | 0.0014 ± 0.0008<br>(0.0005 – 0.0022) | 0.0003 ± 0.0001<br>(0.0002 – 0.0004)  | 0.0006 ± 0.0003<br>(0.0004 – 0.0010) | 0.0004 ± 0.0004<br>(0.0001 – 0.0011)  | 0.0057 ± 0.0016<br>(0.0042 – 0.0093) | 0.0014 ± 0.0005<br>(0.0007 – 0.0018)  |
| 500            | NA                                              | NA                                    | 0.0006 ± 0.0004<br>(0.0002 – 0.0011) | NA                                    | 0.0002 ± 0.0002<br>(0.0001 – 0.0004) | 0.0003 ± 0.0002<br>(0.0001 – 0.0005)  | 0.0025 ± 0.0007<br>(0.0017 – 0.0041) | 0.0007 ± 0.0003<br>(0.0004 – 0.0011)  |
| 550            | NA                                              | NA                                    | 0.0002 ± 0.0002<br>(0.01 – 0.0004)   | NA                                    | 0.0001 ± 0.0001<br>(0.0001 – 0.0002) | 0.0003 ± 0.0003<br>(0.0000 – 0.0006)  | 0.0011 ± 0.0005<br>(0.0004 – 0.0021) | 0.0003 ± 0.0001<br>(0.0002 – 0.0004)  |
|                | <b>Absorption Angstrom Exponent calculation</b> |                                       |                                      |                                       |                                      |                                       |                                      |                                       |
| Å <sub>a</sub> | 33.1 ± 26.0<br>(7.10 – 59.0)                    | 15.1 ± 3.69<br>(11.4 – 18.8)          | 8.58 ± 1.29<br>(7.29 – 9.88)         | 11.9 ± 1.57<br>(10.1 – 13.0)          | 10.7 ± 1.69<br>(9.09 – 12.4)         | 10.1 ± 2.76<br>(6.17 – 12.8)          | 6.89 ± 0.63<br>(6.32 – 8.30)         | 7.69 ± 0.76<br>(6.96 – 8.74)          |
| <i>r</i>       | -0.93 ± 0.03<br>(-0.96 – -0.90)                 | -0.96 ± 0.00<br>(-0.96 – -0.95)       | -0.98 ± 0.00<br>(-0.99 – -0.98)      | -0.97 ± 0.01<br>(-0.97 – -0.96)       | -0.97 ± 0.01<br>(-0.98 – -0.96)      | -0.97 ± 0.02<br>(-0.99 – -0.95)       | -0.99 ± 0.012<br>(-0.99 – -0.95)     | -0.99 ± 0.01<br>(-1.00 – -0.98)       |
| % NA           | 46.1 ± 46.0<br>(0.080 – 92.2)                   | 39.2 ± 30.0<br>(9.19 – 69.2)          | 0.36 ± 0.28<br>(0.08 – 0.64)         | 18.3 ± 13.8<br>(2.40 – 26.8)          | 7.87 ± 6.18<br>(1.92 – 16.5)         | 9.88 ± 12.7<br>(0.00 – 29.1)          | 0.053 ± 0.16<br>(0.00 – 0.48)        | 0.00                                  |

**Table S5. Continue**

| $\lambda$<br>(nm) | Ethylbenzene <sup>e</sup>                       |                                       | Benzene <sup>e</sup>                 |                                       | Naphthalene <sup>e</sup>             |                                       | <i>m</i> -Cresol <sup>e</sup>        |                                       |
|-------------------|-------------------------------------------------|---------------------------------------|--------------------------------------|---------------------------------------|--------------------------------------|---------------------------------------|--------------------------------------|---------------------------------------|
|                   | NO <sub>x</sub> (N = 6)                         | H <sub>2</sub> O <sub>2</sub> (N = 5) | NO <sub>x</sub> (N = 8)              | H <sub>2</sub> O <sub>2</sub> (N = 5) | NO <sub>x</sub> (N = 3)              | H <sub>2</sub> O <sub>2</sub> (N = 3) | NO <sub>x</sub> (N = 3)              | H <sub>2</sub> O <sub>2</sub> (N = 2) |
|                   | <b>MAE</b>                                      |                                       |                                      |                                       |                                      |                                       |                                      |                                       |
| 365               | 0.83 ± 0.26<br>(0.63 – 1.35)                    | 0.32 ± 0.11<br>(0.15 – 0.43)          | 1.67 ± 0.66<br>(1.12 – 2.79)         | 0.36 ± 0.066<br>(0.31 – 0.45)         | 1.17 ± 0.088<br>(1.07 – 1.23)        | 0.62 ± 0.027<br>(0.60 – 0.65)         | 2.47 ± 1.05<br>(1.30 – 3.26)         | 0.24 ± 0.0003<br>(0.24 – 0.24)        |
| 400               | 0.50 ± 0.14<br>(0.36 – 0.77)                    | 0.18 ± 0.076<br>(0.070 – 0.25)        | 0.88 ± 0.21<br>(0.70 – 1.28)         | 0.21 ± 0.048<br>(0.17 – 0.27)         | 0.78 ± 0.074<br>(0.70 – 0.84)        | 0.35 ± 0.028<br>(0.33 – 0.38)         | 1.19 ± 0.37<br>(0.78 – 1.50)         | 0.11 ± 0.0009<br>(0.11 – 0.12)        |
| 450               | 0.22 ± 0.061<br>(0.14 – 0.33)                   | 0.078 ± 0.039<br>(0.021 – 0.12)       | 0.41 ± 0.064<br>(0.34 – 0.53)        | 0.097 ± 0.031<br>(0.068 – 0.13)       | 0.43 ± 0.034<br>(0.40 – 0.46)        | 0.17 ± 0.017<br>(0.15 – 0.19)         | 0.39 ± 0.056<br>(0.34 – 0.45)        | 0.043 ± 0.0015<br>(0.041 – 0.044)     |
| 500               | 0.093 ± 0.026<br>(0.057 – 0.14)                 | 0.034 ± 0.020<br>(0.0058 – 0.057)     | 0.19 ± 0.032<br>(0.16 – 0.25)        | 0.042 ± 0.017<br>(0.023 – 0.060)      | 0.25 ± 0.015<br>(0.23 – 0.26)        | 0.081 ± 0.0098<br>(0.073 – 0.092)     | 0.17 ± 0.033<br>(0.15 – 0.21)        | 0.017 ± 0.0029<br>(0.014 – 0.020)     |
| 550               | 0.039 ± 0.013<br>(0.021 – 0.057)                | 0.011 ± 0.0093<br>(0.0003 – 0.023)    | 0.087 ± 0.015<br>(0.071 – 0.12)      | 0.017 ± 0.0085<br>(0.0068 – 0.025)    | 0.12 ± 0.011<br>(0.11 – 0.13)        | 0.037 ± 0.0078<br>(0.033 – 0.046)     | 0.077 ± 0.014<br>(0.067 – 0.093)     | 0.0087 ± 0.0007<br>(0.0080 – 0.0094)  |
|                   | <b>K</b>                                        |                                       |                                      |                                       |                                      |                                       |                                      |                                       |
| 365               | 0.029 ± 0.0091<br>(0.022 – 0.047)               | 0.011 ± 0.0039<br>(0.0053 – 0.015)    | 0.058 ± 0.023<br>(0.039 – 0.097)     | 0.013 ± 0.0023<br>(0.011 – 0.016)     | 0.041 ± 0.0031<br>(0.037 – 0.043)    | 0.022 ± 0.0009<br>(0.021 – 0.023)     | 0.086 ± 0.037<br>(0.045 – 0.11)      | 0.0083 ± 0.0000<br>(0.0083 – 0.0084)  |
| 400               | 0.019 ± 0.0054<br>(0.014 – 0.030)               | 0.0069 ± 0.0029<br>(0.0027 – 0.0097)  | 0.034 ± 0.0080<br>(0.027 – 0.049)    | 0.0082 ± 0.0018<br>(0.0065 – 0.010)   | 0.030 ± 0.0028<br>(0.027 – 0.032)    | 0.013 ± 0.0011<br>(0.013 – 0.015)     | 0.045 ± 0.014<br>(0.030 – 0.057)     | 0.0044 ± 0.0000<br>(0.0043 – 0.0044)  |
| 450               | 0.0096 ± 0.0026<br>(0.0060 – 0.014)             | 0.0034 ± 0.0017<br>(0.0009 – 0.0051)  | 0.017 ± 0.0027<br>(0.015 – 0.023)    | 0.0042 ± 0.0013<br>(0.0029 – 0.0057)  | 0.019 ± 0.0015<br>(0.017 – 0.020)    | 0.0072 ± 0.0007<br>(0.0066 – 0.0080)  | 0.017 ± 0.0024<br>(0.015 – 0.019)    | 0.0018 ± 0.0001<br>(0.0018 – 0.0019)  |
| 500               | 0.0044 ± 0.0012<br>(0.0027 – 0.0065)            | 0.0016 ± 0.0009<br>(0.0003 – 0.0027)  | 0.0090 ± 0.0015<br>(0.0076 – 0.012)  | 0.0020 ± 0.0008<br>(0.0011 – 0.0029)  | 0.012 ± 0.0007<br>(0.011 – 0.013)    | 0.0039 ± 0.0005<br>(0.0035 – 0.0044)  | 0.0081 ± 0.0016<br>(0.0070 – 0.0099) | 0.0008 ± 0.0001<br>(0.0007 – 0.0010)  |
| 550               | 0.0020 ± 0.0007<br>(0.0011 – 0.0030)            | 0.0006 ± 0.0005<br>(0.0000 – 0.0012)  | 0.0046 ± 0.0008<br>(0.0038 – 0.0061) | 0.0009 ± 0.0004<br>(0.0004 – 0.0013)  | 0.0062 ± 0.0006<br>(0.0058 – 0.0069) | 0.0020 ± 0.0004<br>(0.0017 – 0.0024)  | 0.0040 ± 0.0007<br>(0.0035 – 0.0049) | 0.0005 ± 0.0000<br>(0.0004 – 0.0005)  |
|                   | <b>Absorption Angstrom Exponent calculation</b> |                                       |                                      |                                       |                                      |                                       |                                      |                                       |
| $\text{\AA}_a$    | 6.39 ± 0.44<br>(5.80 – 7.09)                    | 7.46 ± 1.32<br>(6.29 – 9.64)          | 5.84 ± 0.50<br>(5.24 – 6.63)         | 6.53 ± 0.72<br>(5.88 – 7.45)          | 4.92 ± 0.23<br>(4.71 – 5.16)         | 6.46 ± 0.25<br>(6.17 – 6.63)          | 6.86 ± 0.97<br>(5.82 – 7.70)         | 7.75 ± 0.24<br>(7.51 – 7.99)          |
| <i>r</i>          | -0.99 ± 0.00<br>(-0.99 – -0.98)                 | -0.99 ± 0.00<br>(-0.99 – -0.99)       | -0.98 ± 0.00<br>(-0.98 – -0.98)      | -0.99 ± 0.00<br>(-0.99 – -0.99)       | -1.00 ± 0.00<br>(-1.00 – -0.99)      | -1.00 ± 0.00<br>(-1.00 – -1.00)       | -0.98 ± 0.01<br>(-0.98 – -0.96)      | -1.00 ± 0.00<br>(-1.00 – -1.00)       |
| % NA              | 0.00                                            | 0.00                                  | 0.00                                 | 0.00                                  | 0.00                                 | 0.00                                  | 0.00                                 | 0.00                                  |

**Table S6. Average and ranges of mass contribution (%) of identified nitro-aromatic compounds to SOA generated from chamber experiments.**

| Suggested Formula                                           | m/z [M-H] <sup>a</sup> | $\alpha$ -Pinene                                  |                                       | Isoprene                            |                                       | $\beta$ -Caryophyllene               |                                       |
|-------------------------------------------------------------|------------------------|---------------------------------------------------|---------------------------------------|-------------------------------------|---------------------------------------|--------------------------------------|---------------------------------------|
|                                                             |                        | NO <sub>x</sub> (N = 4)                           | H <sub>2</sub> O <sub>2</sub> (N = 2) | NO <sub>x</sub> (N = 3)             | H <sub>2</sub> O <sub>2</sub> (N = 2) | NO <sub>x</sub> (N = 2)              | H <sub>2</sub> O <sub>2</sub> (N = 2) |
| C <sub>6</sub> H <sub>5</sub> NO <sub>3</sub>               | 138.0196               | / <sup>b</sup>                                    | /                                     | /                                   | /                                     | /                                    | /                                     |
| C <sub>7</sub> H <sub>7</sub> NO <sub>3</sub>               | 152.0353               | 0.0020 ± 0.0013 <sup>c</sup><br>(0.0008 – 0.0038) | /                                     | /                                   | /                                     | 0.0020 ± 0.0005<br>(0.0014 – 0.0025) | /                                     |
| C <sub>6</sub> H <sub>5</sub> NO <sub>4</sub>               | 154.0145               | /                                                 | /                                     | /                                   | /                                     | /                                    | /                                     |
| C <sub>7</sub> H <sub>7</sub> NO <sub>4</sub>               | 168.0302               | 0.0024 ± 0.0019<br>(0.0007 – 0.0044)              | 0.0009 ± 0.0001<br>(0.0009 – 0.0010)  | 0.0089 ± 0.0083<br>(0.0031 – 0.015) | /                                     | 0.0072 ± 0.0051<br>(0.0021 – 0.012)  | /                                     |
| C <sub>6</sub> H <sub>5</sub> NO <sub>5</sub>               | 170.0095               | 0.0078 ± 0.0022<br>(0.0059 – 0.010)               | /                                     | /                                   | /                                     | /                                    | /                                     |
| C <sub>8</sub> H <sub>7</sub> NO <sub>4</sub>               | 180.0302               | /                                                 | /                                     | /                                   | /                                     | /                                    | /                                     |
| C <sub>7</sub> H <sub>5</sub> NO <sub>5</sub>               | 182.0095               | /                                                 | /                                     | /                                   | /                                     | /                                    | /                                     |
| C <sub>8</sub> H <sub>9</sub> NO <sub>4</sub>               | 182.0459               | /                                                 | /                                     | /                                   | /                                     | /                                    | /                                     |
| C <sub>7</sub> H <sub>7</sub> NO <sub>5</sub>               | 184.0253               | /                                                 | /                                     | /                                   | /                                     | /                                    | /                                     |
| C <sub>10</sub> H <sub>7</sub> NO <sub>3</sub>              | 188.0353               | /                                                 | /                                     | /                                   | /                                     | /                                    | /                                     |
| C <sub>9</sub> H <sub>9</sub> NO <sub>4</sub>               | 194.0458               | /                                                 | /                                     | /                                   | /                                     | /                                    | /                                     |
| C <sub>8</sub> H <sub>9</sub> NO <sub>5</sub>               | 198.0407               | /                                                 | /                                     | /                                   | /                                     | /                                    | /                                     |
| C <sub>6</sub> H <sub>4</sub> N <sub>2</sub> O <sub>6</sub> | 198.9997               | /                                                 | /                                     | /                                   | /                                     | /                                    | /                                     |
| C <sub>10</sub> H <sub>7</sub> NO <sub>4</sub>              | 204.0302               | /                                                 | /                                     | /                                   | /                                     | /                                    | /                                     |
| C <sub>7</sub> H <sub>6</sub> N <sub>2</sub> O <sub>6</sub> | 213.0157               | /                                                 | /                                     | /                                   | /                                     | /                                    | /                                     |

<sup>a</sup> The mass accuracy for all identified formula are within 10 ppm; <sup>b</sup> not detected; <sup>c</sup> for sample number  $N > 2$ , represent mean ± standard deviation; for sample number  $N = 2$ , represent mean ± difference/2;

**Table S6. Continue**

| Suggested formula                                           | m/z [M-H] <sup>-</sup> | 1,3,5-Trimethylbenzene  |                                       | 1,2,4-Trimethylbenzene               |                                       | <i>m</i> -Xylene                     |                                       | Toluene                             |                                       |
|-------------------------------------------------------------|------------------------|-------------------------|---------------------------------------|--------------------------------------|---------------------------------------|--------------------------------------|---------------------------------------|-------------------------------------|---------------------------------------|
|                                                             |                        | NO <sub>x</sub> (N = 2) | H <sub>2</sub> O <sub>2</sub> (N = 3) | NO <sub>x</sub> (N = 2)              | H <sub>2</sub> O <sub>2</sub> (N = 3) | NO <sub>x</sub> (N = 4)              | H <sub>2</sub> O <sub>2</sub> (N = 5) | NO <sub>x</sub> (N = 9)             | H <sub>2</sub> O <sub>2</sub> (N = 4) |
| C <sub>6</sub> H <sub>5</sub> NO <sub>3</sub>               | 138.0196               | /                       | /                                     | /                                    | /                                     | /                                    | /                                     | /                                   | /                                     |
| C <sub>7</sub> H <sub>7</sub> NO <sub>3</sub>               | 152.0353               | /                       | /                                     | 0.0019 ± 0.0001<br>(0.0019 – 0.0020) | /                                     | 0.0021 ± 0.0001<br>(0.0021 – 0.0022) | /                                     | 0.030 ± 0.010<br>(0.014 – 0.045)    | 0.0034 ± 0.0035<br>(0.0010 – 0.0074)  |
| C <sub>6</sub> H <sub>5</sub> NO <sub>4</sub>               | 154.0145               | /                       | /                                     | /                                    | /                                     | /                                    | /                                     | 0.088 ± 0.036<br>(0.052 – 0.17)     | 0.0028 ± 0.0011<br>(0.0017 – 0.0038)  |
| C <sub>7</sub> H <sub>7</sub> NO <sub>4</sub>               | 168.0302               | /                       | /                                     | 0.012 ± 0.0078<br>(0.0044 – 0.020)   | /                                     | 0.010 ± 0.0098<br>(0.0030 – 0.025)   | /                                     | 0.29 ± 0.17<br>(0.082 – 0.62)       | 0.012 ± 0.016<br>(0.0022 – 0.030)     |
| C <sub>6</sub> H <sub>5</sub> NO <sub>5</sub>               | 170.0095               | /                       | /                                     | /                                    | /                                     | /                                    | /                                     | /                                   | /                                     |
| C <sub>8</sub> H <sub>7</sub> NO <sub>4</sub>               | 180.0302               | /                       | /                                     | 0.11 ± 0.0067<br>(0.10 – 0.12)       | /                                     | /                                    | /                                     | /                                   | /                                     |
| C <sub>7</sub> H <sub>5</sub> NO <sub>5</sub>               | 182.0095               | /                       | /                                     | /                                    | /                                     | /                                    | /                                     | /                                   | /                                     |
| C <sub>8</sub> H <sub>9</sub> NO <sub>4</sub>               | 182.0459               | /                       | /                                     | 0.011 ± 0.0030<br>(0.0075 – 0.014)   | /                                     | 0.019 ± 0.0035<br>(0.016 – 0.024)    | 0.0006 ± 0.0001<br>(0.0006 – 0.0008)  | 0.0053 ± 0.0026<br>(0.0032 – 0.010) | /                                     |
| C <sub>7</sub> H <sub>7</sub> NO <sub>5</sub>               | 184.0253               | /                       | /                                     | /                                    | /                                     | /                                    | /                                     | 0.030 ± 0.011<br>(0.014 – 0.044)    | /                                     |
| C <sub>10</sub> H <sub>7</sub> NO <sub>3</sub>              | 188.0353               | /                       | /                                     | /                                    | /                                     | /                                    | /                                     | /                                   | /                                     |
| C <sub>9</sub> H <sub>9</sub> NO <sub>4</sub>               | 194.0458               | /                       | /                                     | 0.062 ± 0.031<br>(0.031 – 0.092)     | /                                     | 0.0085 ± 0.0033<br>(0.0049 – 0.013)  | /                                     | /                                   | /                                     |
| C <sub>8</sub> H <sub>9</sub> NO <sub>5</sub>               | 198.0407               | /                       | /                                     | /                                    | /                                     | 0.0032 ± 0.0011<br>(0.0025 – 0.0045) | /                                     | 0.0076 ± 0.0034<br>(0.0032 – 0.013) | /                                     |
| C <sub>6</sub> H <sub>4</sub> N <sub>2</sub> O <sub>6</sub> | 198.9997               | /                       | /                                     | /                                    | /                                     | /                                    | /                                     | /                                   | /                                     |
| C <sub>10</sub> H <sub>7</sub> NO <sub>4</sub>              | 204.0302               | /                       | /                                     | /                                    | /                                     | /                                    | /                                     | /                                   | /                                     |
| C <sub>7</sub> H <sub>6</sub> N <sub>2</sub> O <sub>6</sub> | 213.0157               | /                       | /                                     | /                                    | /                                     | /                                    | /                                     | 0.19 ± 0.093<br>(0.072 – 0.34)      | /                                     |

**Table S6. Continue**

| Suggested formula                                           | m/z [M-H] <sup>+</sup> | Ethylbenzene                         |                                          | Benzene                             |                                          | Naphthalene                          |                                          | <i>m</i> -Cresol                  |                                          |
|-------------------------------------------------------------|------------------------|--------------------------------------|------------------------------------------|-------------------------------------|------------------------------------------|--------------------------------------|------------------------------------------|-----------------------------------|------------------------------------------|
|                                                             |                        | NO <sub>x</sub><br>(N = 6)           | H <sub>2</sub> O <sub>2</sub><br>(N = 5) | NO <sub>x</sub><br>(N = 8)          | H <sub>2</sub> O <sub>2</sub><br>(N = 5) | NO <sub>x</sub><br>(N = 3)           | H <sub>2</sub> O <sub>2</sub><br>(N = 3) | NO <sub>x</sub><br>(N = 3)        | H <sub>2</sub> O <sub>2</sub><br>(N = 2) |
| C <sub>6</sub> H <sub>5</sub> NO <sub>3</sub>               | 138.0196               | 0.0048 ± 0.0020<br>(0.0030 – 0.0078) | /                                        | 0.0068 ± 0.0046<br>(0.0024 – 0.013) | /                                        | /                                    | /                                        | /                                 | /                                        |
| C <sub>7</sub> H <sub>7</sub> NO <sub>3</sub>               | 152.0353               | /                                    | /                                        | /                                   | /                                        | 0.0083 ± 0.0015<br>(0.0073 – 0.0094) | /                                        | 0.062 ± 0.051<br>(0.027 – 0.12)   | /                                        |
| C <sub>6</sub> H <sub>5</sub> NO <sub>4</sub>               | 154.0145               | 0.23 ± 0.10<br>(0.15 – 0.40)         | 0.012 ± 0.0036<br>(0.0076 – 0.017)       | 4.65 ± 3.78<br>(1.05 – 12.0)        | 0.051 ± 0.043<br>(0.020 – 0.12)          | 0.094 ± 0.090<br>(0.039 – 0.20)      | /                                        | 0.055 ± 0.017<br>(0.036 – 0.069)  | /                                        |
| C <sub>7</sub> H <sub>7</sub> NO <sub>4</sub>               | 168.0302               | 0.0054 ± 0.0048<br>(0.0015 – 0.013)  | /                                        | /                                   | /                                        | 0.0060 ± 0.0038<br>(0.0023 – 0.0099) | /                                        | 8.34 ± 5.87<br>(3.03 – 14.6)      | /                                        |
| C <sub>6</sub> H <sub>5</sub> NO <sub>5</sub>               | 170.0095               | 0.0079 ± 0.0029<br>(0.0044 – 0.012)  | /                                        | 1.08 ± 0.39<br>(0.64 – 1.71)        | /                                        | /                                    | /                                        | 0.016 ± 0.0079<br>(0.011 – 0.022) | /                                        |
| C <sub>8</sub> H <sub>7</sub> NO <sub>4</sub>               | 180.0302               | 0.27 ± 0.21<br>(0.12 – 0.62)         | /                                        | /                                   | /                                        | 0.47 ± 0.39<br>(0.075 – 0.85)        | /                                        | 0.20 ± 0.12<br>(0.12 – 0.29)      | /                                        |
| C <sub>7</sub> H <sub>5</sub> NO <sub>5</sub>               | 182.0095               | 0.21 ± 0.095<br>(0.11 – 0.33)        | /                                        | /                                   | /                                        | 0.26 ± 0.076<br>(0.19 – 0.34)        | /                                        | /                                 | /                                        |
| C <sub>8</sub> H <sub>9</sub> NO <sub>4</sub>               | 182.0459               | 0.32 ± 0.26<br>(0.16 – 0.78)         | /                                        | /                                   | /                                        | /                                    | /                                        | /                                 | /                                        |
| C <sub>7</sub> H <sub>7</sub> NO <sub>5</sub>               | 184.0253               | /                                    | /                                        | 0.015 ± 0.0069<br>(0.0056 – 0.026)  | /                                        | /                                    | /                                        | 1.43 ± 0.69<br>(0.84 – 2.19)      | /                                        |
| C <sub>10</sub> H <sub>7</sub> NO <sub>3</sub>              | 188.0353               | /                                    | /                                        | /                                   | /                                        | 4.05 ± 1.37<br>(3.20 – 5.63)         | 1.37 ± 1.55<br>(0.43 – 3.16)             | /                                 | /                                        |
| C <sub>9</sub> H <sub>9</sub> NO <sub>4</sub>               | 194.0458               | /                                    | /                                        | /                                   | /                                        | /                                    | /                                        | /                                 | /                                        |
| C <sub>8</sub> H <sub>9</sub> NO <sub>5</sub>               | 198.0407               | 0.052 ± 0.028<br>(0.032 – 0.10)      | /                                        | /                                   | /                                        | 0.14 ± 0.089<br>(0.041 – 0.22)       | /                                        | 0.21 ± 0.083<br>(0.11 – 0.27)     | /                                        |
| C <sub>6</sub> H <sub>4</sub> N <sub>2</sub> O <sub>6</sub> | 198.9997               | /                                    | /                                        | 0.045 ± 0.039<br>(0.014 – 0.13)     | /                                        | /                                    | /                                        | /                                 | /                                        |
| C <sub>10</sub> H <sub>7</sub> NO <sub>4</sub>              | 204.0302               | /                                    | /                                        | /                                   | /                                        | 1.39 ± 0.37<br>(1.06 – 1.79)         | 0.25 ± 0.28<br>(0.085 – 0.58)            | /                                 | /                                        |
| C <sub>7</sub> H <sub>6</sub> N <sub>2</sub> O <sub>6</sub> | 213.0157               | /                                    | /                                        | /                                   | /                                        | /                                    | /                                        | 0.032 ± 0.019<br>(0.018 – 0.054)  | /                                        |

**Table S7. Average and ranges of contribution (%) of identified nitro-aromatic compounds to light absorption at 365 nm (Abs<sub>365</sub>) of SOA generated from chamber experiments.**

| Suggested formula                                           | m/z<br>[M-H] <sup>-</sup> | $\alpha$ -Pinene                          |                                       | Isoprene                |                                       | $\beta$ -Caryophyllene       |                                       |
|-------------------------------------------------------------|---------------------------|-------------------------------------------|---------------------------------------|-------------------------|---------------------------------------|------------------------------|---------------------------------------|
|                                                             |                           | NO <sub>x</sub> (N = 4)                   | H <sub>2</sub> O <sub>2</sub> (N = 2) | NO <sub>x</sub> (N = 3) | H <sub>2</sub> O <sub>2</sub> (N = 2) | NO <sub>x</sub> (N = 2)      | H <sub>2</sub> O <sub>2</sub> (N = 2) |
| C <sub>6</sub> H <sub>5</sub> NO <sub>3</sub>               | 138.0196                  | / <sup>a</sup>                            | /                                     | /                       | /                                     | /                            | /                                     |
| C <sub>7</sub> H <sub>7</sub> NO <sub>3</sub>               | 152.0353                  | 0.29 ± 0.23 <sup>b</sup><br>(0.11 – 0.55) | /                                     | /                       | /                                     | 2.42 ± 2.01<br>(0.41 – 4.43) | /                                     |
| C <sub>6</sub> H <sub>5</sub> NO <sub>4</sub>               | 154.0145                  | /                                         | /                                     | /                       | /                                     | /                            | /                                     |
| C <sub>7</sub> H <sub>7</sub> NO <sub>4</sub>               | 168.0302                  | 1.10 ± 1.31<br>(0.28 – 2.60)              | 0.64 ± 0.13<br>(0.51 – 0.77)          | /                       | /                                     | /                            | /                                     |
| C <sub>6</sub> H <sub>5</sub> NO <sub>5</sub>               | 170.0095                  | 4.65 ± 1.84<br>(3.41 – 6.76)              | /                                     | /                       | /                                     | /                            | /                                     |
| C <sub>8</sub> H <sub>7</sub> NO <sub>4</sub>               | 180.0302                  | /                                         | /                                     | /                       | /                                     | /                            | /                                     |
| C <sub>7</sub> H <sub>5</sub> NO <sub>5</sub>               | 182.0095                  | /                                         | /                                     | /                       | /                                     | /                            | /                                     |
| C <sub>8</sub> H <sub>9</sub> NO <sub>4</sub>               | 182.0459                  | /                                         | /                                     | /                       | /                                     | /                            | /                                     |
| C <sub>7</sub> H <sub>7</sub> NO <sub>5</sub>               | 184.0253                  | /                                         | /                                     | /                       | /                                     | /                            | /                                     |
| C <sub>10</sub> H <sub>7</sub> NO <sub>3</sub>              | 188.0353                  | /                                         | /                                     | /                       | /                                     | /                            | /                                     |
| C <sub>9</sub> H <sub>9</sub> NO <sub>4</sub>               | 194.0458                  | /                                         | /                                     | /                       | /                                     | /                            | /                                     |
| C <sub>8</sub> H <sub>9</sub> NO <sub>5</sub>               | 198.0407                  | /                                         | /                                     | /                       | /                                     | /                            | /                                     |
| C <sub>6</sub> H <sub>4</sub> N <sub>2</sub> O <sub>6</sub> | 198.9997                  | /                                         | /                                     | /                       | /                                     | /                            | /                                     |
| C <sub>10</sub> H <sub>7</sub> NO <sub>4</sub>              | 204.0302                  | /                                         | /                                     | /                       | /                                     | /                            | /                                     |
| C <sub>7</sub> H <sub>6</sub> N <sub>2</sub> O <sub>6</sub> | 213.0157                  | /                                         | /                                     | /                       | /                                     | /                            | /                                     |

<sup>a</sup> No absorption could be estimated, since the compound could not be detected or the compound has no absorption at the given wavelength ( $\lambda$ ); <sup>b</sup> for sample number  $N > 2$ , represent mean  $\pm$  standard deviation; for sample number  $N=2$ , represent mean  $\pm$  difference/2.

**Table S7. Continue**

| Suggested formula                                           | m/z [M-H] <sup>-</sup> | 1,3,5-Trimethylbenzene  |                                       | 1,2,4-Trimethylbenzene           |                                       | <i>m</i> -Xylene                  |                                       | Toluene                        |                                       |
|-------------------------------------------------------------|------------------------|-------------------------|---------------------------------------|----------------------------------|---------------------------------------|-----------------------------------|---------------------------------------|--------------------------------|---------------------------------------|
|                                                             |                        | NO <sub>x</sub> (N = 2) | H <sub>2</sub> O <sub>2</sub> (N = 3) | NO <sub>x</sub> (N = 2)          | H <sub>2</sub> O <sub>2</sub> (N = 3) | NO <sub>x</sub> (N = 4)           | H <sub>2</sub> O <sub>2</sub> (N = 5) | NO <sub>x</sub> (N = 9)        | H <sub>2</sub> O <sub>2</sub> (N = 4) |
| C <sub>6</sub> H <sub>5</sub> NO <sub>3</sub>               | 138.0196               | /                       | /                                     | /                                | /                                     | /                                 | /                                     | /                              | /                                     |
| C <sub>7</sub> H <sub>7</sub> NO <sub>3</sub>               | 152.0353               | /                       | /                                     | 0.045 ± 0.018<br>(0.027 – 0.063) | /                                     | 0.069 ± 0.0007<br>(0.068 – 0.070) | /                                     | 0.18 ± 0.081<br>(0.10 – 0.33)  | 0.050 ± 0.045<br>(0.020 – 0.10)       |
| C <sub>6</sub> H <sub>5</sub> NO <sub>4</sub>               | 154.0145               | /                       | /                                     | /                                | /                                     | /                                 | /                                     | 1.12 ± 0.20<br>(0.92 – 1.56)   | 0.13 ± 0.037<br>(0.10 – 0.17)         |
| C <sub>7</sub> H <sub>7</sub> NO <sub>4</sub>               | 168.0302               | /                       | /                                     | 0.85 ± 0.24<br>(0.61 – 1.09)     | /                                     | 0.92 ± 0.52<br>(0.39 – 1.64)      | /                                     | 6.68 ± 3.09<br>(2.73 – 11.2)   | 0.72 ± 0.84<br>(0.15 – 1.69)          |
| C <sub>6</sub> H <sub>5</sub> NO <sub>5</sub>               | 170.0095               | /                       | /                                     | /                                | /                                     | /                                 | /                                     | /                              | /                                     |
| C <sub>8</sub> H <sub>7</sub> NO <sub>4</sub>               | 180.0302               | /                       | /                                     | 0.28 ± 0.11<br>(0.17 – 0.38)     | /                                     | /                                 | /                                     | /                              | /                                     |
| C <sub>7</sub> H <sub>5</sub> NO <sub>5</sub>               | 182.0095               | /                       | /                                     | /                                | /                                     | /                                 | /                                     | /                              | /                                     |
| C <sub>8</sub> H <sub>9</sub> NO <sub>4</sub>               | 182.0459               | /                       | /                                     | 0.88 ± 0.15<br>(0.74 – 1.03)     | /                                     | 2.08 ± 0.38<br>(1.58 – 2.41)      | 0.12 ± 0.035<br>(0.088 – 0.16)        | 0.12 ± 0.052<br>(0.078 – 0.21) | /                                     |
| C <sub>7</sub> H <sub>7</sub> NO <sub>5</sub>               | 184.0253               | /                       | /                                     | /                                | /                                     | /                                 | /                                     | 0.77 ± 0.28<br>(0.49 – 1.36)   | /                                     |
| C <sub>10</sub> H <sub>7</sub> NO <sub>3</sub>              | 188.0353               | /                       | /                                     | /                                | /                                     | /                                 | /                                     | /                              | /                                     |
| C <sub>9</sub> H <sub>9</sub> NO <sub>4</sub>               | 194.0458               | /                       | /                                     | 0.14 ± 0.011<br>(0.13 – 0.15)    | /                                     | 0.028 ± 0.0073<br>(0.021 – 0.038) | /                                     | /                              | /                                     |
| C <sub>8</sub> H <sub>9</sub> NO <sub>5</sub>               | 198.0407               | /                       | /                                     | /                                | /                                     | 0.36 ± 0.032<br>(0.32 – 0.39)     | /                                     | 0.19 ± 0.071<br>(0.12 – 0.35)  | /                                     |
| C <sub>6</sub> H <sub>4</sub> N <sub>2</sub> O <sub>6</sub> | 198.9997               | /                       | /                                     | /                                | /                                     | /                                 | /                                     | /                              | /                                     |
| C <sub>10</sub> H <sub>7</sub> NO <sub>4</sub>              | 204.0302               | /                       | /                                     | /                                | /                                     | /                                 | /                                     | /                              | /                                     |
| C <sub>7</sub> H <sub>6</sub> N <sub>2</sub> O <sub>6</sub> | 213.0157               | /                       | /                                     | /                                | /                                     | /                                 | /                                     | 2.43 ± 1.08<br>(1.31 – 4.55)   | /                                     |

**Table S7. Continue**

| Suggested formula                                           | m/z [M-H] <sup>-</sup> | Ethylbenzene                       |                                       | Benzene                             |                                       | Naphthalene                       |                                       | m-Cresol                         |                                       |
|-------------------------------------------------------------|------------------------|------------------------------------|---------------------------------------|-------------------------------------|---------------------------------------|-----------------------------------|---------------------------------------|----------------------------------|---------------------------------------|
|                                                             |                        | NO <sub>x</sub> (N = 6)            | H <sub>2</sub> O <sub>2</sub> (N = 5) | NO <sub>x</sub> (N = 8)             | H <sub>2</sub> O <sub>2</sub> (N = 5) | NO <sub>x</sub> (N = 3)           | H <sub>2</sub> O <sub>2</sub> (N = 3) | NO <sub>x</sub> (N = 3)          | H <sub>2</sub> O <sub>2</sub> (N = 2) |
| C <sub>6</sub> H <sub>5</sub> NO <sub>3</sub>               | 138.0196               | 0.014 ± 0.0059<br>(0.0094 – 0.025) | /                                     | 0.0090 ± 0.0050<br>(0.0045 – 0.019) | /                                     | /                                 | /                                     | /                                | /                                     |
| C <sub>7</sub> H <sub>7</sub> NO <sub>3</sub>               | 152.0353               | /                                  | /                                     | /                                   | /                                     | 0.023 ± 0.0022<br>(0.021 – 0.024) | /                                     | 0.075 ± 0.038<br>(0.041 – 0.12)  | /                                     |
| C <sub>6</sub> H <sub>5</sub> NO <sub>4</sub>               | 154.0145               | 1.91 ± 0.52<br>(1.17 – 2.57)       | 0.27 ± 0.069<br>(0.20 – 0.35)         | 17.5 ± 9.28<br>(6.53 – 33.0)        | 1.07 ± 1.01<br>(0.32 – 2.62)          | 0.55 ± 0.50<br>(0.23 – 1.12)      | /                                     | 0.20 ± 0.16<br>(0.078 – 0.38)    | /                                     |
| C <sub>7</sub> H <sub>7</sub> NO <sub>4</sub>               | 168.0302               | 0.074 ± 0.047<br>(0.024 – 0.13)    | /                                     | /                                   | /                                     | 0.067 ± 0.041<br>(0.024 – 0.11)   | /                                     | 40.5 ± 15.2<br>(30.6 – 57.9)     | /                                     |
| C <sub>6</sub> H <sub>5</sub> NO <sub>5</sub>               | 170.0095               | 0.13 ± 0.054<br>(0.082 – 0.21)     | /                                     | 10.1 ± 4.22<br>(3.22 – 15.5)        | /                                     | /                                 | /                                     | 0.14 ± 0.14<br>(0.045 – 0.24)    | /                                     |
| C <sub>8</sub> H <sub>7</sub> NO <sub>4</sub>               | 180.0302               | 0.11 ± 0.079<br>(0.051 – 0.25)     | /                                     | /                                   | /                                     | 0.15 ± 0.13<br>(0.021 – 0.28)     | /                                     | 0.023 ± 0.011<br>(0.015 – 0.031) | /                                     |
| C <sub>7</sub> H <sub>5</sub> NO <sub>5</sub>               | 182.0095               | 0.082 ± 0.023<br>(0.048 – 0.10)    | /                                     | /                                   | /                                     | 0.077 ± 0.021<br>(0.055 – 0.096)  | /                                     | /                                | /                                     |
| C <sub>8</sub> H <sub>9</sub> NO <sub>4</sub>               | 182.0459               | 4.53 ± 2.38<br>(1.52 – 7.46)       | /                                     | /                                   | /                                     | /                                 | /                                     | /                                | /                                     |
| C <sub>7</sub> H <sub>7</sub> NO <sub>5</sub>               | 184.0253               | /                                  | /                                     | 0.14 ± 0.063<br>(0.048 – 0.24)      | /                                     | /                                 | /                                     | 8.25 ± 1.79<br>(6.19 – 9.41)     | /                                     |
| C <sub>10</sub> H <sub>7</sub> NO <sub>3</sub>              | 188.0353               | /                                  | /                                     | /                                   | /                                     | 13.2 ± 5.62<br>(9.74 – 19.7)      | 8.09 ± 8.84<br>(2.62 – 18.3)          | /                                | /                                     |
| C <sub>9</sub> H <sub>9</sub> NO <sub>4</sub>               | 194.0458               | /                                  | /                                     | /                                   | /                                     | /                                 | /                                     | /                                | /                                     |
| C <sub>8</sub> H <sub>9</sub> NO <sub>5</sub>               | 198.0407               | 0.84 ± 0.26<br>(0.54 – 1.13)       | /                                     | /                                   | /                                     | 1.7 ± 1.18<br>(0.46 – 2.82)       | /                                     | 1.18 ± 0.17<br>(0.99 – 1.33)     | /                                     |
| C <sub>6</sub> H <sub>4</sub> N <sub>2</sub> O <sub>6</sub> | 198.9997               | /                                  | /                                     | 0.17 ± 0.17<br>(0.040 – 0.54)       | /                                     | /                                 | /                                     | /                                | /                                     |
| C <sub>10</sub> H <sub>7</sub> NO <sub>4</sub>              | 204.0302               | /                                  | /                                     | /                                   | /                                     | 4.52 ± 1.56<br>(3.22 – 6.25)      | 1.49 ± 1.61<br>(0.51 – 3.35)          | /                                | /                                     |
| C <sub>7</sub> H <sub>6</sub> N <sub>2</sub> O <sub>6</sub> | 213.0157               | /                                  | /                                     | /                                   | /                                     | /                                 | /                                     | 0.094 ± 0.040<br>(0.053 – 0.13)  | /                                     |



**Table S8. Average and ranges of contribution (%) of identified nitro-aromatic compounds to light absorption at 400 nm (Abs<sub>400</sub>) of SOA generated from chamber experiments.**

| Suggested formula                                           | m/z<br>[M-H] <sup>+</sup> | $\alpha$ -Pinene                             |                                       | Isoprene                |                                       | $\beta$ -Caryophyllene  |                                       |
|-------------------------------------------------------------|---------------------------|----------------------------------------------|---------------------------------------|-------------------------|---------------------------------------|-------------------------|---------------------------------------|
|                                                             |                           | NO <sub>x</sub> (N = 4)                      | H <sub>2</sub> O <sub>2</sub> (N = 2) | NO <sub>x</sub> (N = 3) | H <sub>2</sub> O <sub>2</sub> (N = 2) | NO <sub>x</sub> (N = 2) | H <sub>2</sub> O <sub>2</sub> (N = 2) |
| C <sub>6</sub> H <sub>5</sub> NO <sub>3</sub>               | 138.0196                  | / <sup>a</sup>                               | /                                     | /                       | /                                     | /                       | /                                     |
| C <sub>7</sub> H <sub>7</sub> NO <sub>3</sub>               | 152.0353                  | 0.072 ± 0.059 <sup>b</sup><br>(0.031 – 0.14) | /                                     | /                       | /                                     | /                       | /                                     |
| C <sub>6</sub> H <sub>5</sub> NO <sub>4</sub>               | 154.0145                  | /                                            | /                                     | /                       | /                                     | /                       | /                                     |
| C <sub>7</sub> H <sub>7</sub> NO <sub>4</sub>               | 168.0302                  | 0.57 ± 0.68<br>(0.12 – 1.35)                 | 0.51 ± 0.0063<br>(0.50 – 0.51)        | /                       | /                                     | /                       | /                                     |
| C <sub>6</sub> H <sub>5</sub> NO <sub>5</sub>               | 170.0095                  | 6.88 ± 2.87<br>(4.66 – 10.1)                 | /                                     | /                       | /                                     | /                       | /                                     |
| C <sub>8</sub> H <sub>7</sub> NO <sub>4</sub>               | 180.0302                  | /                                            | /                                     | /                       | /                                     | /                       | /                                     |
| C <sub>7</sub> H <sub>5</sub> NO <sub>5</sub>               | 182.0095                  | /                                            | /                                     | /                       | /                                     | /                       | /                                     |
| C <sub>8</sub> H <sub>9</sub> NO <sub>4</sub>               | 182.0459                  | /                                            | /                                     | /                       | /                                     | /                       | /                                     |
| C <sub>7</sub> H <sub>7</sub> NO <sub>5</sub>               | 184.0253                  | /                                            | /                                     | /                       | /                                     | /                       | /                                     |
| C <sub>10</sub> H <sub>7</sub> NO <sub>3</sub>              | 188.0353                  | /                                            | /                                     | /                       | /                                     | /                       | /                                     |
| C <sub>9</sub> H <sub>9</sub> NO <sub>4</sub>               | 194.0458                  | /                                            | /                                     | /                       | /                                     | /                       | /                                     |
| C <sub>8</sub> H <sub>9</sub> NO <sub>5</sub>               | 198.0407                  | /                                            | /                                     | /                       | /                                     | /                       | /                                     |
| C <sub>6</sub> H <sub>4</sub> N <sub>2</sub> O <sub>6</sub> | 198.9997                  | /                                            | /                                     | /                       | /                                     | /                       | /                                     |
| C <sub>10</sub> H <sub>7</sub> NO <sub>4</sub>              | 204.0302                  | /                                            | /                                     | /                       | /                                     | /                       | /                                     |
| C <sub>7</sub> H <sub>6</sub> N <sub>2</sub> O <sub>6</sub> | 213.0157                  | /                                            | /                                     | /                       | /                                     | /                       | /                                     |

<sup>a</sup> No absorption could be estimated, since the compound could not be detected or the compound has no absorption at the given wavelength ( $\lambda$ ); <sup>b</sup> for sample number  $N > 2$ , represent mean  $\pm$  standard deviation; for sample number  $N=2$ , represent mean  $\pm$  difference/2.

**Table S8. Continue**

| Suggested formula                                           | m/z [M-H] <sup>-</sup> | 1,3,5-Trimethylbenzene  |                                       | 1,2,4-Trimethylbenzene             |                                       | m-Xylene                          |                                       | Toluene                         |                                       |
|-------------------------------------------------------------|------------------------|-------------------------|---------------------------------------|------------------------------------|---------------------------------------|-----------------------------------|---------------------------------------|---------------------------------|---------------------------------------|
|                                                             |                        | NO <sub>x</sub> (N = 2) | H <sub>2</sub> O <sub>2</sub> (N = 3) | NO <sub>x</sub> (N = 2)            | H <sub>2</sub> O <sub>2</sub> (N = 3) | NO <sub>x</sub> (N = 4)           | H <sub>2</sub> O <sub>2</sub> (N = 5) | NO <sub>x</sub> (N = 9)         | H <sub>2</sub> O <sub>2</sub> (N = 4) |
| C <sub>6</sub> H <sub>5</sub> NO <sub>3</sub>               | 138.0196               | /                       | /                                     | /                                  | /                                     | /                                 | /                                     | /                               | /                                     |
| C <sub>7</sub> H <sub>7</sub> NO <sub>3</sub>               | 152.0353               | /                       | /                                     | 0.016 ± 0.0076<br>(0.0087 – 0.024) | /                                     | 0.027 ± 0.0015<br>(0.025 – 0.028) | /                                     | 0.055 ± 0.025<br>(0.030 – 0.10) | 0.016 ± 0.014<br>(0.0063 – 0.032)     |
| C <sub>6</sub> H <sub>5</sub> NO <sub>4</sub>               | 154.0145               | /                       | /                                     | /                                  | /                                     | /                                 | /                                     | 1.96 ± 0.40<br>(1.55 – 2.78)    | 0.25 ± 0.061<br>(0.20 – 0.32)         |
| C <sub>7</sub> H <sub>7</sub> NO <sub>4</sub>               | 168.0302               | /                       | /                                     | 0.61 ± 0.13<br>(0.43 – 0.74)       | /                                     | 0.72 ± 0.40<br>(0.32 – 1.26)      | /                                     | 4.10 ± 1.94<br>(1.65 – 7.01)    | 0.47 ± 0.54<br>(0.10 – 1.09)          |
| C <sub>6</sub> H <sub>5</sub> NO <sub>5</sub>               | 170.0095               | /                       | /                                     | /                                  | /                                     | /                                 | /                                     | /                               | /                                     |
| C <sub>8</sub> H <sub>7</sub> NO <sub>4</sub>               | 180.0302               | /                       | /                                     | /                                  | /                                     | /                                 | /                                     | /                               | /                                     |
| C <sub>7</sub> H <sub>5</sub> NO <sub>5</sub>               | 182.0095               | /                       | /                                     | /                                  | /                                     | /                                 | /                                     | /                               | /                                     |
| C <sub>8</sub> H <sub>9</sub> NO <sub>4</sub>               | 182.0459               | /                       | /                                     | 0.65 ± 0.15<br>(0.50 – 0.81)       | /                                     | 1.65 ± 0.32<br>(1.21 – 1.96)      | 0.11 ± 0.036<br>(0.067 – 0.13)        | 0.076 ± 0.035<br>(0.043 – 0.13) | /                                     |
| C <sub>7</sub> H <sub>7</sub> NO <sub>5</sub>               | 184.0253               | /                       | /                                     | /                                  | /                                     | /                                 | /                                     | 1.36 ± 0.49<br>(0.85 – 2.33)    | /                                     |
| C <sub>10</sub> H <sub>7</sub> NO <sub>3</sub>              | 188.0353               | /                       | /                                     | /                                  | /                                     | /                                 | /                                     | /                               | /                                     |
| C <sub>9</sub> H <sub>9</sub> NO <sub>4</sub>               | 194.0458               | /                       | /                                     | /                                  | /                                     | /                                 | /                                     | /                               | /                                     |
| C <sub>8</sub> H <sub>9</sub> NO <sub>5</sub>               | 198.0407               | /                       | /                                     | /                                  | /                                     | 0.80 ± 0.080<br>(0.72 – 0.87)     | /                                     | 0.34 ± 0.12<br>(0.20 – 0.60)    | /                                     |
| C <sub>6</sub> H <sub>4</sub> N <sub>2</sub> O <sub>6</sub> | 198.9997               | /                       | /                                     | /                                  | /                                     | /                                 | /                                     | /                               | /                                     |
| C <sub>10</sub> H <sub>7</sub> NO <sub>4</sub>              | 204.0302               | /                       | /                                     | /                                  | /                                     | /                                 | /                                     | /                               | /                                     |
| C <sub>7</sub> H <sub>6</sub> N <sub>2</sub> O <sub>6</sub> | 213.0157               | /                       | /                                     | /                                  | /                                     | /                                 | /                                     | 6.90 ± 3.06<br>(3.68 – 12.4)    | /                                     |

**Table S8. Continue**

| Suggested formula                                           | m/z [M-H] <sup>-</sup> | Ethylbenzene                        |                                       | Benzene                             |                                       | Naphthalene                          |                                       | m-Cresol                         |                                       |
|-------------------------------------------------------------|------------------------|-------------------------------------|---------------------------------------|-------------------------------------|---------------------------------------|--------------------------------------|---------------------------------------|----------------------------------|---------------------------------------|
|                                                             |                        | NO <sub>x</sub> (N = 6)             | H <sub>2</sub> O <sub>2</sub> (N = 5) | NO <sub>x</sub> (N = 8)             | H <sub>2</sub> O <sub>2</sub> (N = 5) | NO <sub>x</sub> (N = 3)              | H <sub>2</sub> O <sub>2</sub> (N = 3) | NO <sub>x</sub> (N = 3)          | H <sub>2</sub> O <sub>2</sub> (N = 2) |
| C <sub>6</sub> H <sub>5</sub> NO <sub>3</sub>               | 138.0196               | 0.0070 ± 0.0032<br>(0.0044 – 0.013) | /                                     | 0.0050 ± 0.0030<br>(0.0022 – 0.010) | /                                     | /                                    | /                                     | /                                | /                                     |
| C <sub>7</sub> H <sub>7</sub> NO <sub>3</sub>               | 152.0353               | /                                   | /                                     | /                                   | /                                     | 0.0058 ± 0.0004<br>(0.0055 – 0.0061) | /                                     | 0.026 ± 0.015<br>(0.015 – 0.043) | /                                     |
| C <sub>6</sub> H <sub>5</sub> NO <sub>4</sub>               | 154.0145               | 3.10 ± 0.83<br>(2.04 – 4.18)        | 0.50 ± 0.17<br>(0.34 – 0.75)          | 17.9 ± 6.57<br>(10.5 – 29.8)        | 1.88 ± 1.84<br>(0.53 – 4.71)          | 0.80 ± 0.73<br>(0.33 – 1.64)         | /                                     | 0.37 ± 0.23<br>(0.17 – 0.62)     | /                                     |
| C <sub>7</sub> H <sub>7</sub> NO <sub>4</sub>               | 168.0302               | 0.044 ± 0.029<br>(0.013 – 0.076)    | /                                     | /                                   | /                                     | 0.035 ± 0.021<br>(0.012 – 0.054)     | /                                     | 21.7 ± 3.73<br>(17.4 – 24.1)     | /                                     |
| C <sub>6</sub> H <sub>5</sub> NO <sub>5</sub>               | 170.0095               | 0.21 ± 0.082<br>(0.13 – 0.34)       | /                                     | 18.0 ± 6.80<br>(7.09 – 28.6)        | /                                     | /                                    | /                                     | 0.25 ± 0.21<br>(0.099 – 0.39)    | /                                     |
| C <sub>8</sub> H <sub>7</sub> NO <sub>4</sub>               | 180.0302               | /                                   | /                                     | /                                   | /                                     | /                                    | /                                     | /                                | /                                     |
| C <sub>7</sub> H <sub>5</sub> NO <sub>5</sub>               | 182.0095               | /                                   | /                                     | /                                   | /                                     | /                                    | /                                     | /                                | /                                     |
| C <sub>8</sub> H <sub>9</sub> NO <sub>4</sub>               | 182.0459               | 2.59 ± 1.39<br>(0.93 – 4.54)        | /                                     | /                                   | /                                     | /                                    | /                                     | /                                | /                                     |
| C <sub>7</sub> H <sub>7</sub> NO <sub>5</sub>               | 184.0253               | /                                   | /                                     | 0.25 ± 0.11<br>(0.11 – 0.41)        | /                                     | /                                    | /                                     | 14.2 ± 0.80<br>(13.6 – 15.1)     | /                                     |
| C <sub>10</sub> H <sub>7</sub> NO <sub>3</sub>              | 188.0353               | /                                   | /                                     | /                                   | /                                     | 32.8 ± 14.7<br>(23.7 – 49.7)         | 22.9 ± 24.3<br>(7.77 – 50.9)          | /                                | /                                     |
| C <sub>9</sub> H <sub>9</sub> NO <sub>4</sub>               | 194.0458               | /                                   | /                                     | /                                   | /                                     | /                                    | /                                     | /                                | /                                     |
| C <sub>8</sub> H <sub>9</sub> NO <sub>5</sub>               | 198.0407               | 1.39 ± 0.41<br>(0.96 – 1.83)        | /                                     | /                                   | /                                     | 2.61 ± 1.84<br>(0.69 – 4.36)         | /                                     | 2.40 ± 0.52<br>(2.04 – 3.00)     | /                                     |
| C <sub>6</sub> H <sub>4</sub> N <sub>2</sub> O <sub>6</sub> | 198.9997               | /                                   | /                                     | 0.34 ± 0.33<br>(0.10 – 1.06)        | /                                     | /                                    | /                                     | /                                | /                                     |
| C <sub>10</sub> H <sub>7</sub> NO <sub>4</sub>              | 204.0302               | /                                   | /                                     | /                                   | /                                     | 11.2 ± 4.11<br>(7.84 – 15.8)         | 4.22 ± 4.42<br>(1.52 – 9.32)          | /                                | /                                     |
| C <sub>7</sub> H <sub>6</sub> N <sub>2</sub> O <sub>6</sub> | 213.0157               | /                                   | /                                     | /                                   | /                                     | /                                    | /                                     | 0.31 ± 0.15<br>(0.19 – 0.48)     | /                                     |

**Table S9. Average and ranges of contribution (%) of identified nitro-aromatic compounds to light absorption at 450 nm (Abs<sub>450</sub>) of SOA generated from chamber experiments.**

| Suggested formula                                           | m/z<br>[M-H] <sup>-</sup> | $\alpha$ -Pinene                           |                                       | Isoprene                |                                       | $\beta$ -Caryophyllene  |                                       |
|-------------------------------------------------------------|---------------------------|--------------------------------------------|---------------------------------------|-------------------------|---------------------------------------|-------------------------|---------------------------------------|
|                                                             |                           | NO <sub>x</sub> (N = 4)                    | H <sub>2</sub> O <sub>2</sub> (N = 2) | NO <sub>x</sub> (N = 3) | H <sub>2</sub> O <sub>2</sub> (N = 2) | NO <sub>x</sub> (N = 2) | H <sub>2</sub> O <sub>2</sub> (N = 2) |
| C <sub>6</sub> H <sub>5</sub> NO <sub>3</sub>               | 138.0196                  | / <sup>a</sup>                             | /                                     | /                       | /                                     | /                       | /                                     |
| C <sub>7</sub> H <sub>7</sub> NO <sub>3</sub>               | 152.0353                  | /                                          | /                                     | /                       | /                                     | /                       | /                                     |
| C <sub>6</sub> H <sub>5</sub> NO <sub>4</sub>               | 154.0145                  | /                                          | /                                     | /                       | /                                     | /                       | /                                     |
| C <sub>7</sub> H <sub>7</sub> NO <sub>4</sub>               | 168.0302                  | 0.15 ± 0.18 <sup>b</sup><br>(0.031 – 0.36) | 0.14 ± 0.0017<br>(0.13 – 0.14)        | /                       | /                                     | /                       | /                                     |
| C <sub>6</sub> H <sub>5</sub> NO <sub>5</sub>               | 170.0095                  | 0.79 ± 0.33<br>(0.53 – 1.16)               | /                                     | /                       | /                                     | /                       | /                                     |
| C <sub>8</sub> H <sub>7</sub> NO <sub>4</sub>               | 180.0302                  | /                                          | /                                     | /                       | /                                     | /                       | /                                     |
| C <sub>7</sub> H <sub>5</sub> NO <sub>5</sub>               | 182.0095                  | /                                          | /                                     | /                       | /                                     | /                       | /                                     |
| C <sub>8</sub> H <sub>9</sub> NO <sub>4</sub>               | 182.0459                  | /                                          | /                                     | /                       | /                                     | /                       | /                                     |
| C <sub>7</sub> H <sub>7</sub> NO <sub>5</sub>               | 184.0253                  | /                                          | /                                     | /                       | /                                     | /                       | /                                     |
| C <sub>10</sub> H <sub>7</sub> NO <sub>3</sub>              | 188.0353                  | /                                          | /                                     | /                       | /                                     | /                       | /                                     |
| C <sub>9</sub> H <sub>9</sub> NO <sub>4</sub>               | 194.0458                  | /                                          | /                                     | /                       | /                                     | /                       | /                                     |
| C <sub>8</sub> H <sub>9</sub> NO <sub>5</sub>               | 198.0407                  | /                                          | /                                     | /                       | /                                     | /                       | /                                     |
| C <sub>6</sub> H <sub>4</sub> N <sub>2</sub> O <sub>6</sub> | 198.9997                  | /                                          | /                                     | /                       | /                                     | /                       | /                                     |
| C <sub>10</sub> H <sub>7</sub> NO <sub>4</sub>              | 204.0302                  | /                                          | /                                     | /                       | /                                     | /                       | /                                     |
| C <sub>7</sub> H <sub>6</sub> N <sub>2</sub> O <sub>6</sub> | 213.0157                  | /                                          | /                                     | /                       | /                                     | /                       | /                                     |

<sup>a</sup> No absorption could be estimated, since the compound could not be detected or the compound has no absorption at the given wavelength ( $\lambda$ ); <sup>b</sup> for sample number  $N > 2$ , represent mean  $\pm$  standard deviation; for sample number  $N=2$ , represent mean  $\pm$  difference/2.

**Table S9. Continue**

| Suggested formula                                           | m/z [M-H] <sup>-</sup> | 1,3,5-Trimethylbenzene  |                                       | 1,2,4-Trimethylbenzene        |                                       | <i>m</i> -Xylene                 |                                       | Toluene                           |                                       |
|-------------------------------------------------------------|------------------------|-------------------------|---------------------------------------|-------------------------------|---------------------------------------|----------------------------------|---------------------------------------|-----------------------------------|---------------------------------------|
|                                                             |                        | NO <sub>x</sub> (N = 2) | H <sub>2</sub> O <sub>2</sub> (N = 3) | NO <sub>x</sub> (N = 2)       | H <sub>2</sub> O <sub>2</sub> (N = 3) | NO <sub>x</sub> (N = 4)          | H <sub>2</sub> O <sub>2</sub> (N = 5) | NO <sub>x</sub> (N = 9)           | H <sub>2</sub> O <sub>2</sub> (N = 4) |
| C <sub>6</sub> H <sub>5</sub> NO <sub>3</sub>               | 138.0196               | /                       | /                                     | /                             | /                                     | /                                | /                                     | /                                 | /                                     |
| C <sub>7</sub> H <sub>7</sub> NO <sub>3</sub>               | 152.0353               | /                       | /                                     | /                             | /                                     | /                                | /                                     | /                                 | /                                     |
| C <sub>6</sub> H <sub>5</sub> NO <sub>4</sub>               | 154.0145               | /                       | /                                     | /                             | /                                     | /                                | /                                     | 1.40 ± 0.29<br>(1.11 – 1.99)      | 0.18 ± 0.044<br>(0.14 – 0.23)         |
| C <sub>7</sub> H <sub>7</sub> NO <sub>4</sub>               | 168.0302               | /                       | /                                     | 0.16 ± 0.035<br>(0.13 – 0.20) | /                                     | 0.19 ± 0.11<br>(0.085 – 0.34)    | /                                     | 1.10 ± 0.52<br>(0.44 – 1.87)      | 0.12 ± 0.14<br>(0.027 – 0.29)         |
| C <sub>6</sub> H <sub>5</sub> NO <sub>5</sub>               | 170.0095               | /                       | /                                     | /                             | /                                     | /                                | /                                     | /                                 | /                                     |
| C <sub>8</sub> H <sub>7</sub> NO <sub>4</sub>               | 180.0302               | /                       | /                                     | /                             | /                                     | /                                | /                                     | /                                 | /                                     |
| C <sub>7</sub> H <sub>5</sub> NO <sub>5</sub>               | 182.0095               | /                       | /                                     | /                             | /                                     | /                                | /                                     | /                                 | /                                     |
| C <sub>8</sub> H <sub>9</sub> NO <sub>4</sub>               | 182.0459               | /                       | /                                     | 0.17 ± 0.041<br>(0.13 – 0.22) | /                                     | 0.44 ± 0.085<br>(0.32 – 0.52)    | 0.029 ± 0.0095<br>(0.018 – 0.036)     | 0.020 ± 0.0095<br>(0.011 – 0.036) | /                                     |
| C <sub>7</sub> H <sub>7</sub> NO <sub>5</sub>               | 184.0253               | /                       | /                                     | /                             | /                                     | /                                | /                                     | 0.16 ± 0.056<br>(0.097 – 0.27)    | /                                     |
| C <sub>10</sub> H <sub>7</sub> NO <sub>3</sub>              | 188.0353               | /                       | /                                     | /                             | /                                     | /                                | /                                     | /                                 | /                                     |
| C <sub>9</sub> H <sub>9</sub> NO <sub>4</sub>               | 194.0458               | /                       | /                                     | /                             | /                                     | /                                | /                                     | /                                 | /                                     |
| C <sub>8</sub> H <sub>9</sub> NO <sub>5</sub>               | 198.0407               | /                       | /                                     | /                             | /                                     | 0.092 ± 0.0091<br>(0.082 – 0.10) | /                                     | 0.039 ± 0.014<br>(0.023 – 0.069)  | /                                     |
| C <sub>6</sub> H <sub>4</sub> N <sub>2</sub> O <sub>6</sub> | 198.9997               | /                       | /                                     | /                             | /                                     | /                                | /                                     | /                                 | /                                     |
| C <sub>10</sub> H <sub>7</sub> NO <sub>4</sub>              | 204.0302               | /                       | /                                     | /                             | /                                     | /                                | /                                     | /                                 | /                                     |
| C <sub>7</sub> H <sub>6</sub> N <sub>2</sub> O <sub>6</sub> | 213.0157               | /                       | /                                     | /                             | /                                     | /                                | /                                     | 3.80 ± 1.69<br>(2.03 – 6.82)      | /                                     |

**Table S9. Continue**

| Suggested formula                                           | m/z [M-H] <sup>-</sup> | Ethylbenzene                       |                                       | Benzene                          |                                       | Naphthalene                         |                                       | m-Cresol                         |                                       |
|-------------------------------------------------------------|------------------------|------------------------------------|---------------------------------------|----------------------------------|---------------------------------------|-------------------------------------|---------------------------------------|----------------------------------|---------------------------------------|
|                                                             |                        | NO <sub>x</sub> (N = 6)            | H <sub>2</sub> O <sub>2</sub> (N = 5) | NO <sub>x</sub> (N = 8)          | H <sub>2</sub> O <sub>2</sub> (N = 5) | NO <sub>x</sub> (N = 3)             | H <sub>2</sub> O <sub>2</sub> (N = 3) | NO <sub>x</sub> (N = 3)          | H <sub>2</sub> O <sub>2</sub> (N = 2) |
| C <sub>6</sub> H <sub>5</sub> NO <sub>3</sub>               | 138.0196               | /                                  | /                                     | /                                | /                                     | /                                   | /                                     | /                                | /                                     |
| C <sub>7</sub> H <sub>7</sub> NO <sub>3</sub>               | 152.0353               | /                                  | /                                     | /                                | /                                     | /                                   | /                                     | /                                | /                                     |
| C <sub>6</sub> H <sub>5</sub> NO <sub>4</sub>               | 154.0145               | 2.22 ± 0.59<br>(1.46 – 2.99)       | 0.36 ± 0.12<br>(0.24 – 0.54)          | 10.7 ± 3.22<br>(7.50 – 15.0)     | 1.34 ± 1.31<br>(0.38 – 3.37)          | 0.58 ± 0.52<br>(0.24 – 1.17)        | /                                     | 0.26 ± 0.16<br>(0.12 – 0.44)     | /                                     |
| C <sub>7</sub> H <sub>7</sub> NO <sub>4</sub>               | 168.0302               | 0.012 ± 0.0078<br>(0.0036 – 0.020) | /                                     | /                                | /                                     | 0.0093 ± 0.0057<br>(0.0033 – 0.015) | /                                     | 4.87 ± 1.32<br>(3.68 – 6.30)     | /                                     |
| C <sub>6</sub> H <sub>5</sub> NO <sub>5</sub>               | 170.0095               | 0.024 ± 0.0093<br>(0.015 – 0.039)  | /                                     | 2.05 ± 0.78<br>(0.81 – 3.27)     | /                                     | /                                   | /                                     | 0.028 ± 0.024<br>(0.011 – 0.045) | /                                     |
| C <sub>8</sub> H <sub>7</sub> NO <sub>4</sub>               | 180.0302               | /                                  | /                                     | /                                | /                                     | /                                   | /                                     | /                                | /                                     |
| C <sub>7</sub> H <sub>5</sub> NO <sub>5</sub>               | 182.0095               | /                                  | /                                     | /                                | /                                     | /                                   | /                                     | /                                | /                                     |
| C <sub>8</sub> H <sub>9</sub> NO <sub>4</sub>               | 182.0459               | 0.69 ± 0.37<br>(0.25 – 1.21)       | /                                     | /                                | /                                     | /                                   | /                                     | /                                | /                                     |
| C <sub>7</sub> H <sub>7</sub> NO <sub>5</sub>               | 184.0253               | /                                  | /                                     | 0.029 ± 0.012<br>(0.012 – 0.047) | /                                     | /                                   | /                                     | 1.64 ± 0.073<br>(1.50 – 1.73)    | /                                     |
| C <sub>10</sub> H <sub>7</sub> NO <sub>3</sub>              | 188.0353               | /                                  | /                                     | /                                | /                                     | 12.4 ± 5.55<br>(8.93 – 18.8)        | 8.64 ± 9.18<br>(2.93 – 19.2)          | /                                | /                                     |
| C <sub>9</sub> H <sub>9</sub> NO <sub>4</sub>               | 194.0458               | /                                  | /                                     | /                                | /                                     | /                                   | /                                     | /                                | /                                     |
| C <sub>8</sub> H <sub>9</sub> NO <sub>5</sub>               | 198.0407               | 0.16 ± 0.047<br>(0.11 – 0.21)      | /                                     | /                                | /                                     | 0.30 ± 0.21<br>(0.079 – 0.50)       | /                                     | 0.27 ± 0.059<br>(0.23 – 0.34)    | /                                     |
| C <sub>6</sub> H <sub>4</sub> N <sub>2</sub> O <sub>6</sub> | 198.9997               | /                                  | /                                     | 0.13 ± 0.13<br>(0.040 – 0.41)    | /                                     | /                                   | /                                     | /                                | /                                     |
| C <sub>10</sub> H <sub>7</sub> NO <sub>4</sub>              | 204.0302               | /                                  | /                                     | /                                | /                                     | 4.23 ± 1.55<br>(2.96 – 5.96)        | 1.59 ± 1.67<br>(0.58 – 3.52)          | /                                | /                                     |
| C <sub>7</sub> H <sub>6</sub> N <sub>2</sub> O <sub>6</sub> | 213.0157               | /                                  | /                                     | /                                | /                                     | /                                   | /                                     | 0.17 ± 0.084<br>(0.10 – 0.26)    | /                                     |

**Table S10. Average and ranges of contribution (%) of identified nitro-aromatic compounds to light absorption at 500 nm (Abs<sub>500</sub>) of SOA generated from chamber experiments.**

| Suggested formula                                           | MW [M-H] <sup>-</sup> | Toluene                                    |                                     | Ethylbenzene                  |                                     | Benzene                           |                                     | Naphthalene                   |                                     | <i>m</i> -Cresol                    |                                     |
|-------------------------------------------------------------|-----------------------|--------------------------------------------|-------------------------------------|-------------------------------|-------------------------------------|-----------------------------------|-------------------------------------|-------------------------------|-------------------------------------|-------------------------------------|-------------------------------------|
|                                                             |                       | NO <sub>x</sub> (N=9)                      | H <sub>2</sub> O <sub>2</sub> (N=4) | NO <sub>x</sub> (N=6)         | H <sub>2</sub> O <sub>2</sub> (N=5) | NO <sub>x</sub> (N=8)             | H <sub>2</sub> O <sub>2</sub> (N=5) | NO <sub>x</sub> (N=3)         | H <sub>2</sub> O <sub>2</sub> (N=3) | NO <sub>x</sub> (N=3)               | H <sub>2</sub> O <sub>2</sub> (N=2) |
| C <sub>6</sub> H <sub>5</sub> NO <sub>3</sub>               | 138.0196              | / <sup>a</sup>                             | /                                   | /                             | /                                   | /                                 | /                                   | /                             | /                                   | /                                   | /                                   |
| C <sub>7</sub> H <sub>7</sub> NO <sub>3</sub>               | 152.0353              | /                                          | /                                   | /                             | /                                   | /                                 | /                                   | /                             | /                                   | /                                   | /                                   |
| C <sub>6</sub> H <sub>5</sub> NO <sub>4</sub>               | 154.0145              | 0.38 ± 0.078 <sup>b</sup><br>(0.30 – 0.54) | 0.048 ± 0.012<br>(0.038 – 0.061)    | 0.60 ± 0.16<br>(0.066 – 0.15) | 0.097 ± 0.034<br>(0.39 – 0.81)      | 2.11 ± 0.79<br>(1.22 – 3.80)      | 0.36 ± 0.35<br>(0.10 – 0.91)        | 0.16 ± 0.14<br>(0.064 – 0.32) | /                                   | 0.071 ± 0.044<br>(0.033 – 0.12)     | /                                   |
| C <sub>7</sub> H <sub>7</sub> NO <sub>4</sub>               | 168.0302              | /                                          | /                                   | /                             | /                                   | /                                 | /                                   | /                             | /                                   | /                                   | /                                   |
| C <sub>6</sub> H <sub>5</sub> NO <sub>5</sub>               | 170.0095              | /                                          | /                                   | /                             | /                                   | /                                 | /                                   | /                             | /                                   | /                                   | /                                   |
| C <sub>8</sub> H <sub>7</sub> NO <sub>4</sub>               | 180.0302              | /                                          | /                                   | /                             | /                                   | /                                 | /                                   | /                             | /                                   | /                                   | /                                   |
| C <sub>7</sub> H <sub>5</sub> NO <sub>5</sub>               | 182.0095              | /                                          | /                                   | /                             | /                                   | /                                 | /                                   | /                             | /                                   | /                                   | /                                   |
| C <sub>8</sub> H <sub>9</sub> NO <sub>4</sub>               | 182.0459              | /                                          | /                                   | /                             | /                                   | /                                 | /                                   | /                             | /                                   | /                                   | /                                   |
| C <sub>7</sub> H <sub>7</sub> NO <sub>5</sub>               | 184.0253              | /                                          | /                                   | /                             | /                                   | /                                 | /                                   | /                             | /                                   | /                                   | /                                   |
| C <sub>10</sub> H <sub>7</sub> NO <sub>3</sub>              | 188.0353              | /                                          | /                                   | /                             | /                                   | /                                 | /                                   | 2.07 ± 0.93<br>(1.50 -3.14)   | 1.36 ± 1.38<br>(0.49 – 2.96)        | /                                   | /                                   |
| C <sub>9</sub> H <sub>9</sub> NO <sub>4</sub>               | 194.0458              | /                                          | /                                   | /                             | /                                   | /                                 | /                                   | /                             | /                                   | /                                   | /                                   |
| C <sub>8</sub> H <sub>9</sub> NO <sub>5</sub>               | 198.0407              | /                                          | /                                   | /                             | /                                   | /                                 | /                                   | /                             | /                                   | /                                   | /                                   |
| C <sub>6</sub> H <sub>4</sub> N <sub>2</sub> O <sub>6</sub> | 198.9997              | /                                          | /                                   | /                             | /                                   | 0.028 ± 0.028<br>(0.0085 – 0.088) | /                                   | /                             | /                                   | /                                   | /                                   |
| C <sub>10</sub> H <sub>7</sub> NO <sub>4</sub>              | 204.0302              | /                                          | /                                   | /                             | /                                   | /                                 | /                                   | 0.71 ± 0.26<br>(0.50 -1.00)   | 0.27 ± 0.28<br>(0.096 – 0.60)       | /                                   | /                                   |
| C <sub>7</sub> H <sub>6</sub> N <sub>2</sub> O <sub>6</sub> | 213.0157              | 0.19 ± 0.086<br>(0.10 – 0.35)              | /                                   | /                             | /                                   | /                                 | /                                   | /                             | /                                   | 0.0087 ± 0.0043<br>(0.0052 – 0.013) | /                                   |

<sup>a</sup> No absorption could be estimated, since the compound could not be detected or the compound has no absorption at the given wavelength (λ); <sup>b</sup> for sample number *N* > 2, represent mean ± standard deviation; for sample number *N* = 2, represent mean ± difference/2.

**Table S11. Average and ranges of contribution (%) of identified nitro-aromatic compounds to light absorption at 550 nm (Abs<sub>550</sub>) of SOA generated from chamber experiments.**

| Suggested formula                                           | MW [M-H] <sup>-</sup> | Benzene                                        |                                       |
|-------------------------------------------------------------|-----------------------|------------------------------------------------|---------------------------------------|
|                                                             |                       | NO <sub>x</sub> (N = 8)                        | H <sub>2</sub> O <sub>2</sub> (N = 5) |
| C <sub>6</sub> H <sub>5</sub> NO <sub>3</sub>               | 138.0196              | / <sup>a</sup>                                 | /                                     |
| C <sub>7</sub> H <sub>7</sub> NO <sub>3</sub>               | 152.0353              | /                                              | /                                     |
| C <sub>6</sub> H <sub>5</sub> NO <sub>4</sub>               | 154.0145              | /                                              | /                                     |
| C <sub>7</sub> H <sub>7</sub> NO <sub>4</sub>               | 168.0302              | /                                              | /                                     |
| C <sub>6</sub> H <sub>5</sub> NO <sub>5</sub>               | 170.0095              | /                                              | /                                     |
| C <sub>8</sub> H <sub>7</sub> NO <sub>4</sub>               | 180.0302              | /                                              | /                                     |
| C <sub>7</sub> H <sub>5</sub> NO <sub>5</sub>               | 182.0095              | /                                              | /                                     |
| C <sub>8</sub> H <sub>9</sub> NO <sub>4</sub>               | 182.0459              | /                                              | /                                     |
| C <sub>7</sub> H <sub>7</sub> NO <sub>5</sub>               | 184.0253              | /                                              | /                                     |
| C <sub>10</sub> H <sub>7</sub> NO <sub>3</sub>              | 188.0353              | /                                              | /                                     |
| C <sub>9</sub> H <sub>9</sub> NO <sub>4</sub>               | 194.0458              | /                                              | /                                     |
| C <sub>8</sub> H <sub>9</sub> NO <sub>5</sub>               | 198.0407              | /                                              | /                                     |
| C <sub>6</sub> H <sub>4</sub> N <sub>2</sub> O <sub>6</sub> | 198.9997              | 0.010 ± 0.010 <sup>b</sup><br>(0.0031 – 0.032) | /                                     |
| C <sub>10</sub> H <sub>7</sub> NO <sub>4</sub>              | 204.0302              | /                                              | /                                     |
| C <sub>7</sub> H <sub>6</sub> N <sub>2</sub> O <sub>6</sub> | 213.0157              | /                                              | /                                     |

<sup>a</sup> No absorption could be estimated, since the compound could not be detected or the compound has no absorption at the given wavelength (λ); <sup>b</sup> for sample number N > 2, represent mean ± standard deviation; for sample number N = 2, represent mean ± difference/2.



**Table S12. Average MAE differences ( $\text{m}^2 \text{g}^{-1}$ ) between  $\text{NO}_x$  and  $\text{H}_2\text{O}_2$  reaction conditions derived from sample extracts and contributions of nitro-aromatic compounds.**

| VOCs                   | 365 nm            |                      |                      | 400 nm |         |         | 450 nm |         |         |
|------------------------|-------------------|----------------------|----------------------|--------|---------|---------|--------|---------|---------|
|                        | Bulk <sup>a</sup> | Species <sup>b</sup> | S/B (%) <sup>c</sup> | Bulk   | Species | S/B (%) | Bulk   | Species | S/B (%) |
| 1,3,5-Trimethylbenzene | 0.017             | / <sup>d</sup>       | /                    | 0.0064 | /       | /       | 0.011  | /       | /       |
| 1,2,4-Trimethylbenzene | 0.078             | 0.0036               | 4.66                 | 0.080  | 0.0010  | 1.28    | 0.045  | 0.0003  | 0.60    |
| <i>m</i> -Xylene       | 0.043             | 0.0041               | 9.60                 | 0.055  | 0.0020  | 3.57    | 0.021  | 0.0006  | 2.66    |
| Toluene                | 0.37              | 0.062                | 16.7                 | 0.44   | 0.046   | 10.31   | 0.22   | 0.020   | 9.15    |
| Ethylbenzene           | 0.51              | 0.067                | 13.1                 | 0.60   | 0.039   | 6.39    | 0.32   | 0.016   | 4.96    |
| Benzene                | 1.31              | 0.48                 | 36.7                 | 1.51   | 0.32    | 21.0    | 0.67   | 0.11    | 16.6    |
| Naphthalene            | 0.55              | 0.17                 | 31.1                 | 0.59   | 0.26    | 44.1    | 0.43   | 0.096   | 22.1    |
| <i>m</i> -Cresol       | 2.23              | 1.32                 | 59.0                 | 2.41   | 0.47    | 19.6    | 1.07   | 0.085   | 7.93    |

<sup>a</sup> Difference of average bulk MAE value of sample extracts between  $\text{NO}_x$  and  $\text{H}_2\text{O}_2$  reactions; <sup>b</sup> difference of average MAE contributed by identified nitro-aromatic compounds between  $\text{NO}_x$  and  $\text{H}_2\text{O}_2$  reactions; <sup>c</sup> species/bulk  $\times$  100%, the differences of MAE in sample extracts accounted for by that in contributions from nitro-aromatic compounds; <sup>d</sup> no nitro-aromatic compounds has been detected.

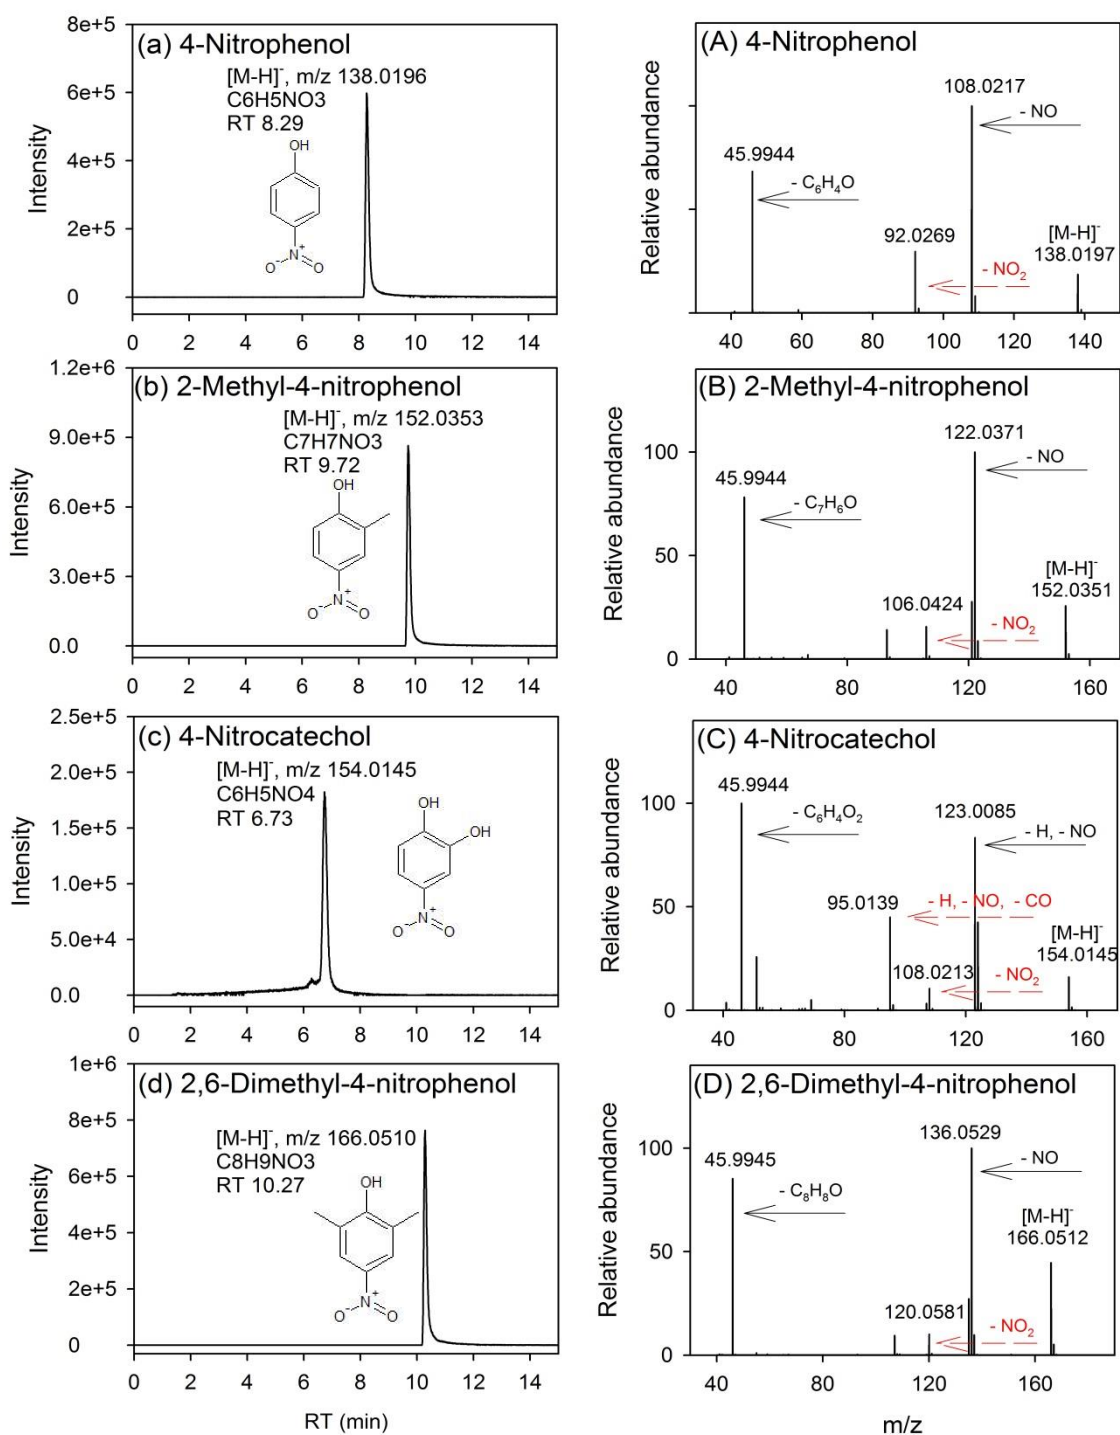

Figure S1. Extracted ion chromatograms (EICs) and Q-ToF MS/MS spectra for standard compounds, (a, A) 4-Nitrophenol, (b, B) 2-Methyl-4-nitrophenol, (c, C) 4-Nitrocatechol and (d, D) 2,6-Dimethyl-4-nitrophenol.

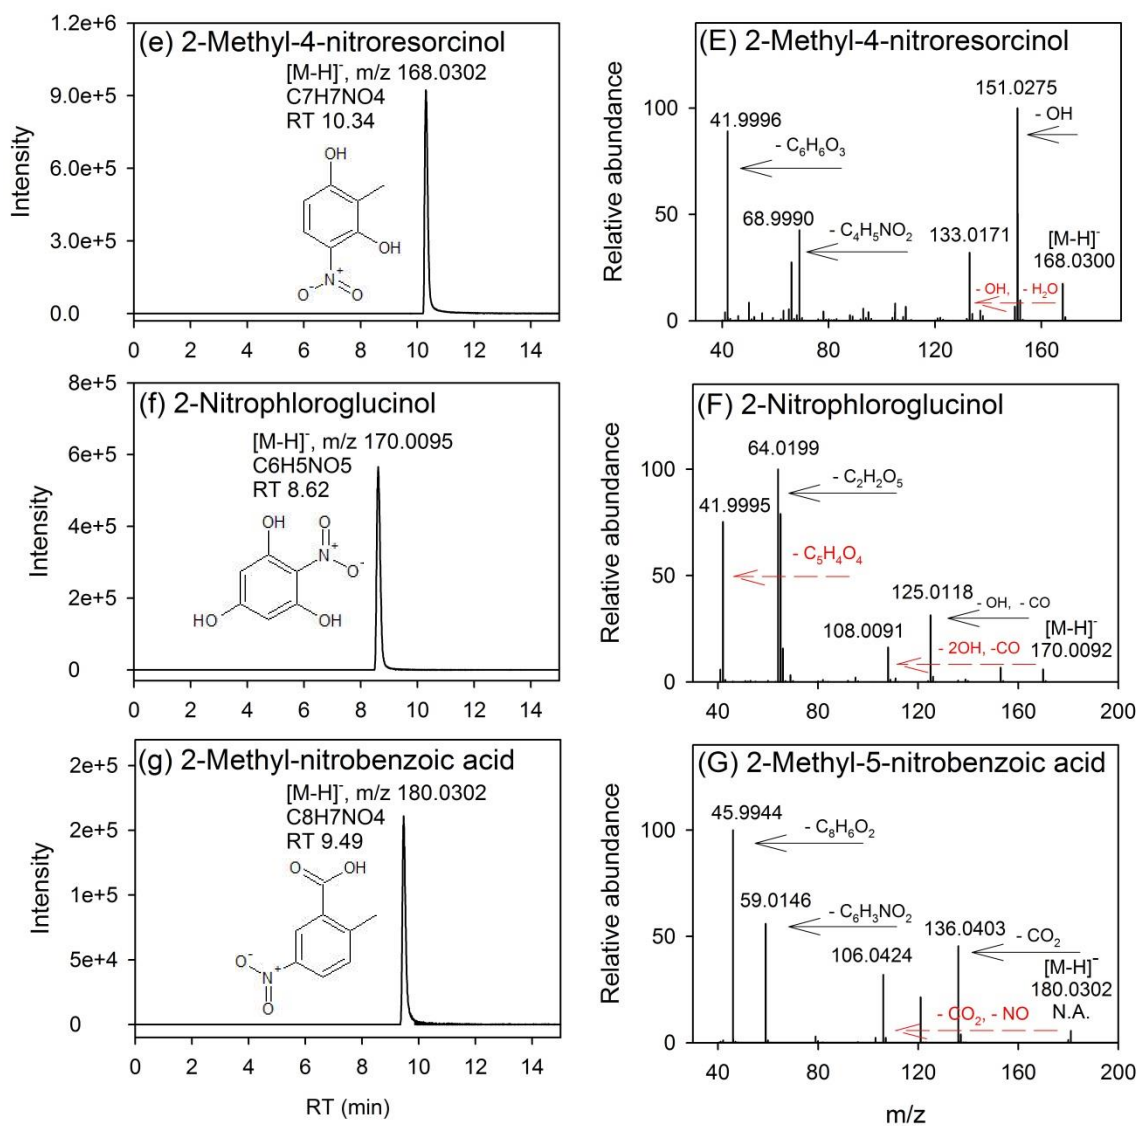

Figure S1. Continue, (e, E) 2-Methyl-4-nitroresorcinol, (f, F) 2-Nitrophenol and (g, G) 2-Methyl-nitrobenzoic acid.

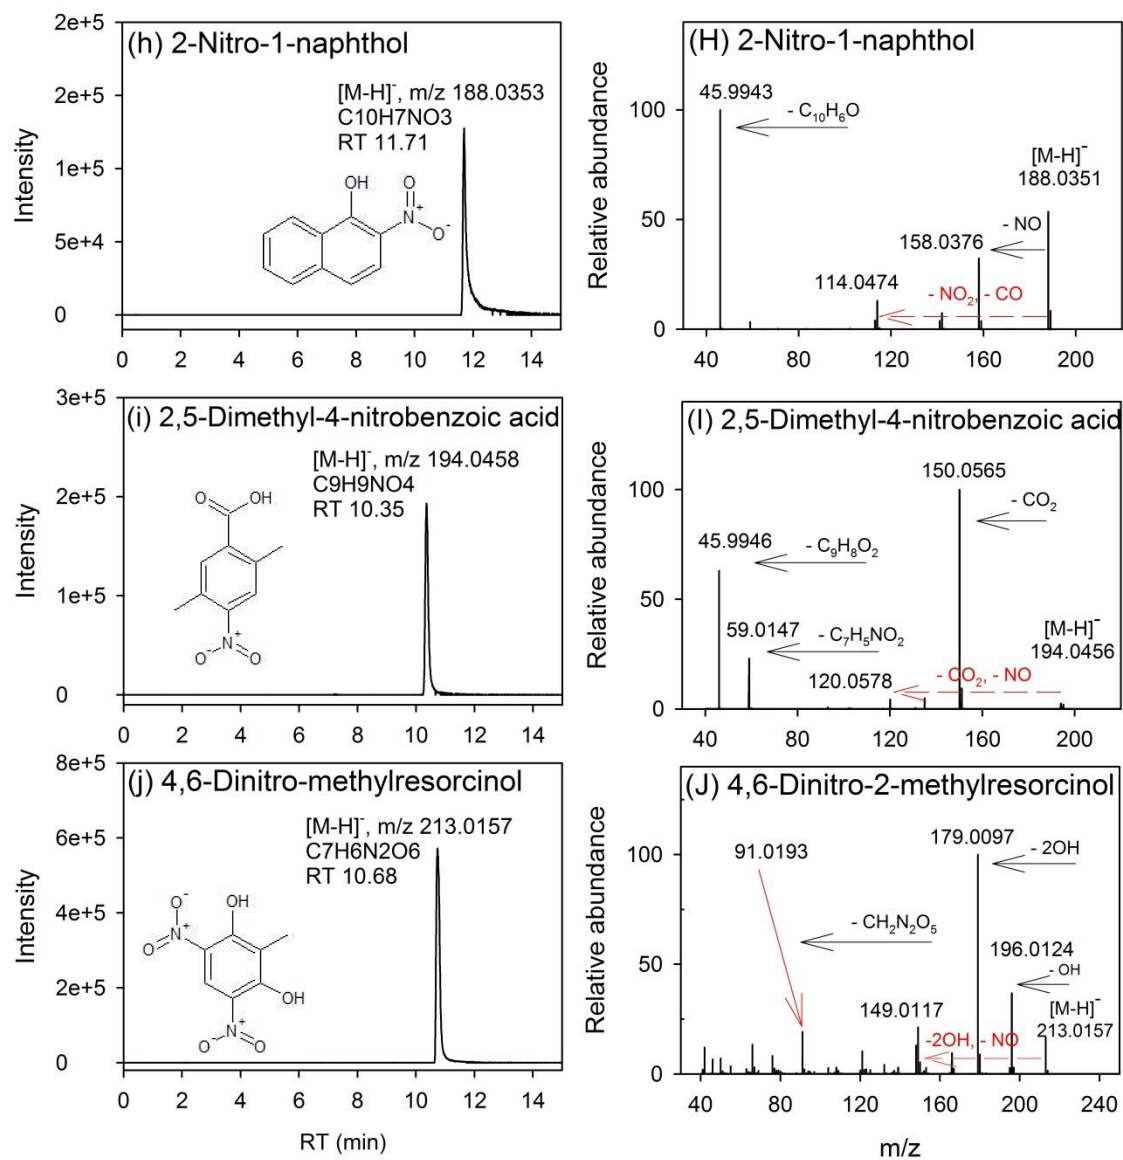

Figure S1. Continue, (h, H) 2-Nitro-1-naphthol, (i, I) 2,5-Dimethyl-4-nitrobenzoic acid, and (j, J) 2,6-Dinitro-methylresorcinol.

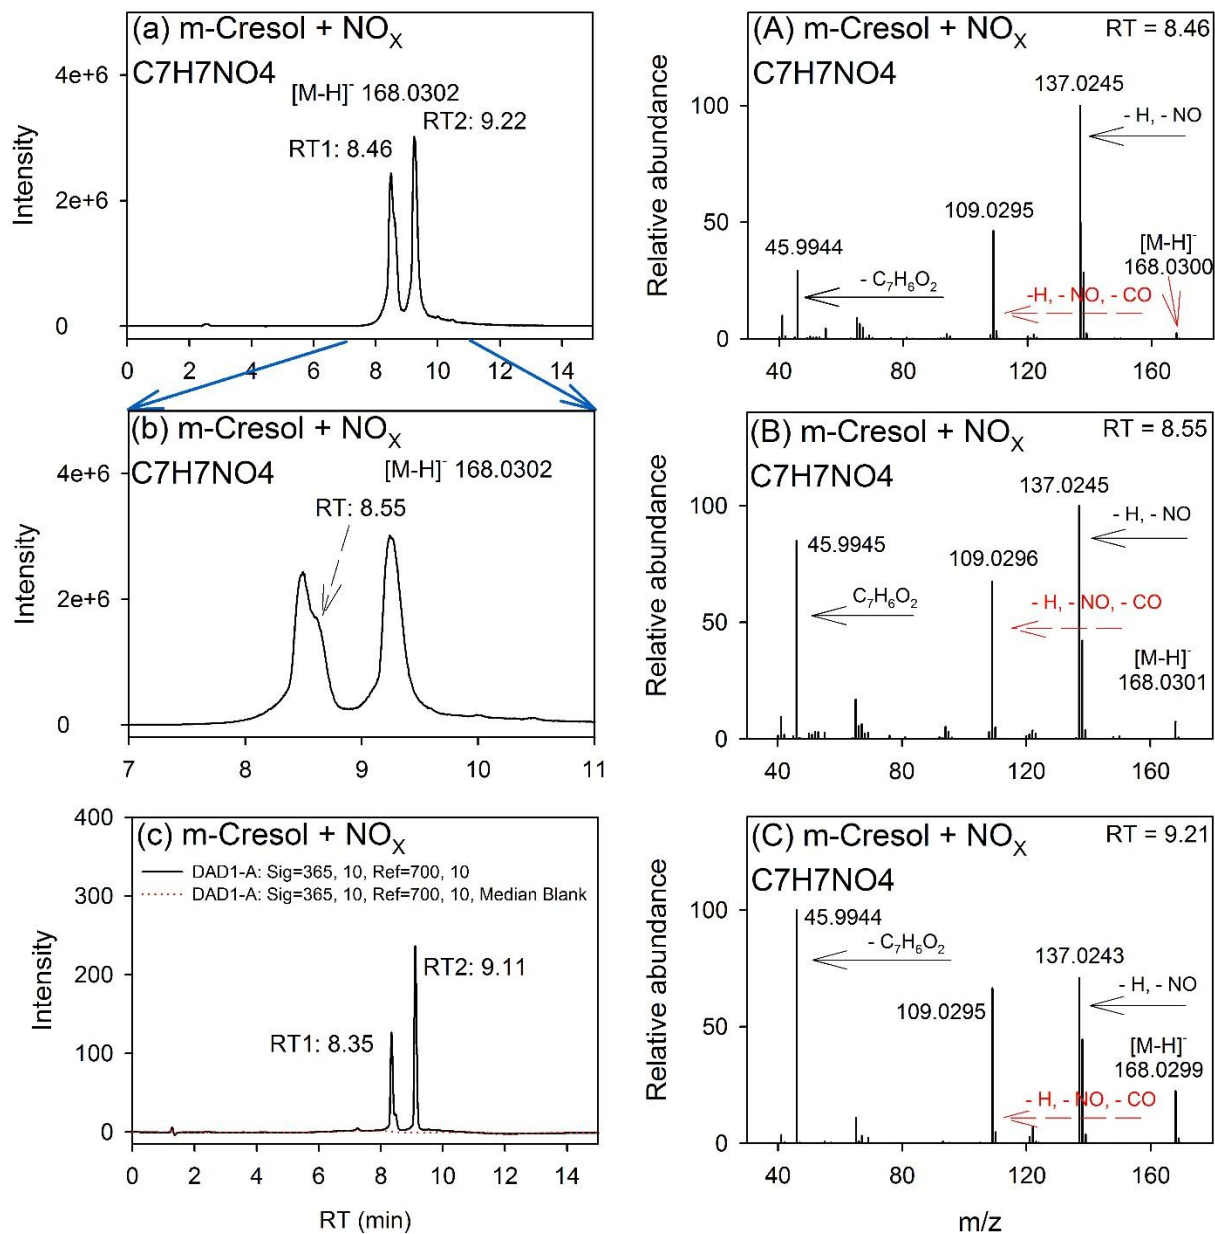

Figure S2. Extracted ion chromatograms (EICs) and Q-ToF MS/MS spectra of the  $C_7H_7NO_4$  compounds (a, b, A-C) generated from *m*-cresol/ $NO_x$  reactions (Sample ER713 GF2), and (c) UV/Vis detector chromatogram (DAD signal) for this sample.

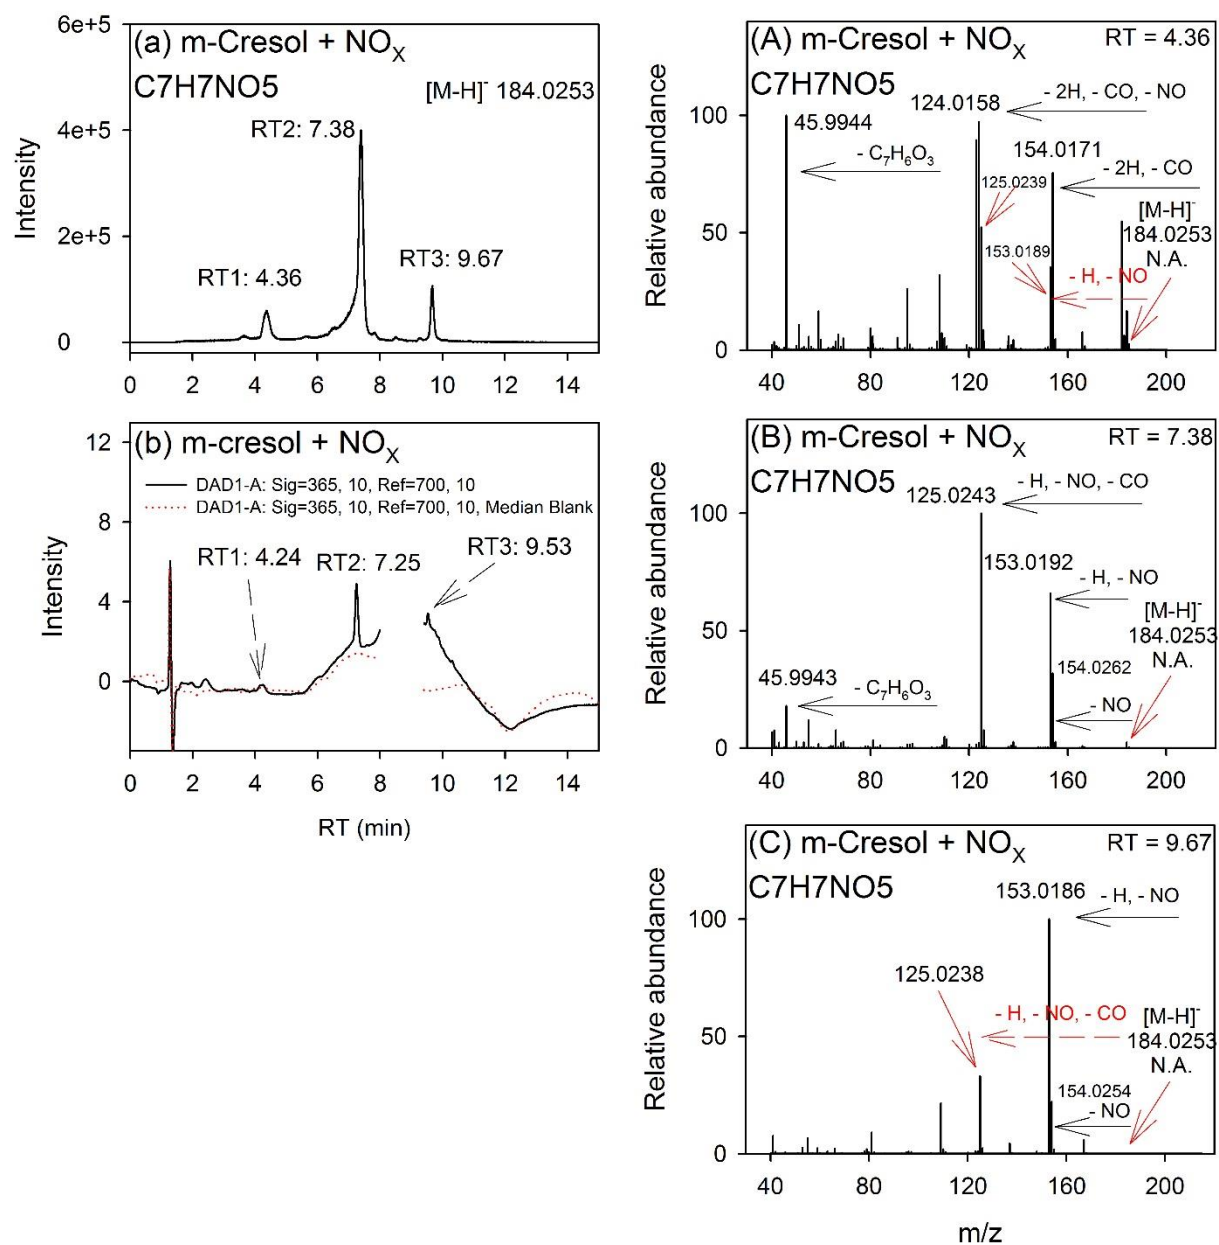

Figure S3. Extracted ion chromatogram (EIC) and Q-ToF MS/MS spectra of the C<sub>7</sub>H<sub>7</sub>NO<sub>5</sub> compounds (a, A-C) generated from *m*-cresol/NO<sub>x</sub> reaction (Sample ER713 GF2), and (b) UV/Vis detector chromatogram (DAD signal) for this sample, omitting C<sub>7</sub>H<sub>7</sub>NO<sub>4</sub> signals.

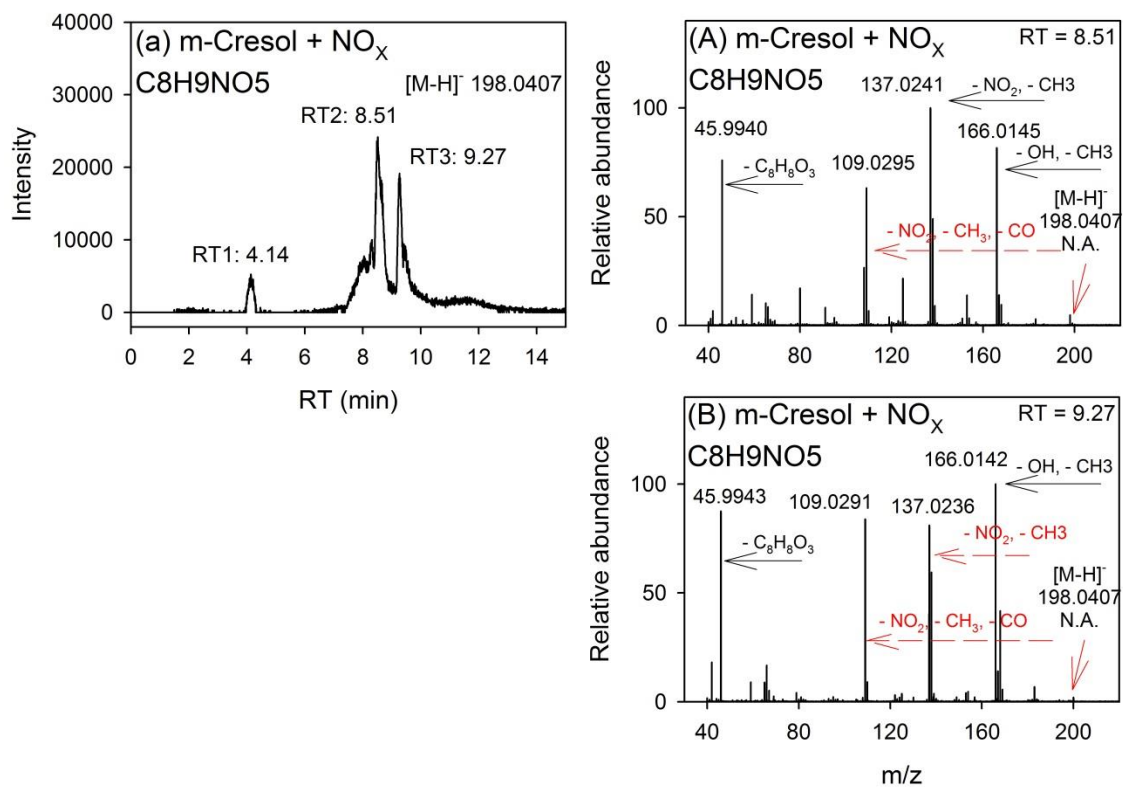

Figure S4. Extracted ion chromatogram (EIC) and Q-ToF MS/MS spectra of the  $C_8H_9NO_5$  compounds (a, A, B) generated from *m*-cresol/ $NO_x$  reaction (Sample ER713 GF2). These compounds have low abundance and their absorbance at 365 nm could not be observed in UV/Vis detector chromatogram (DAD signal).

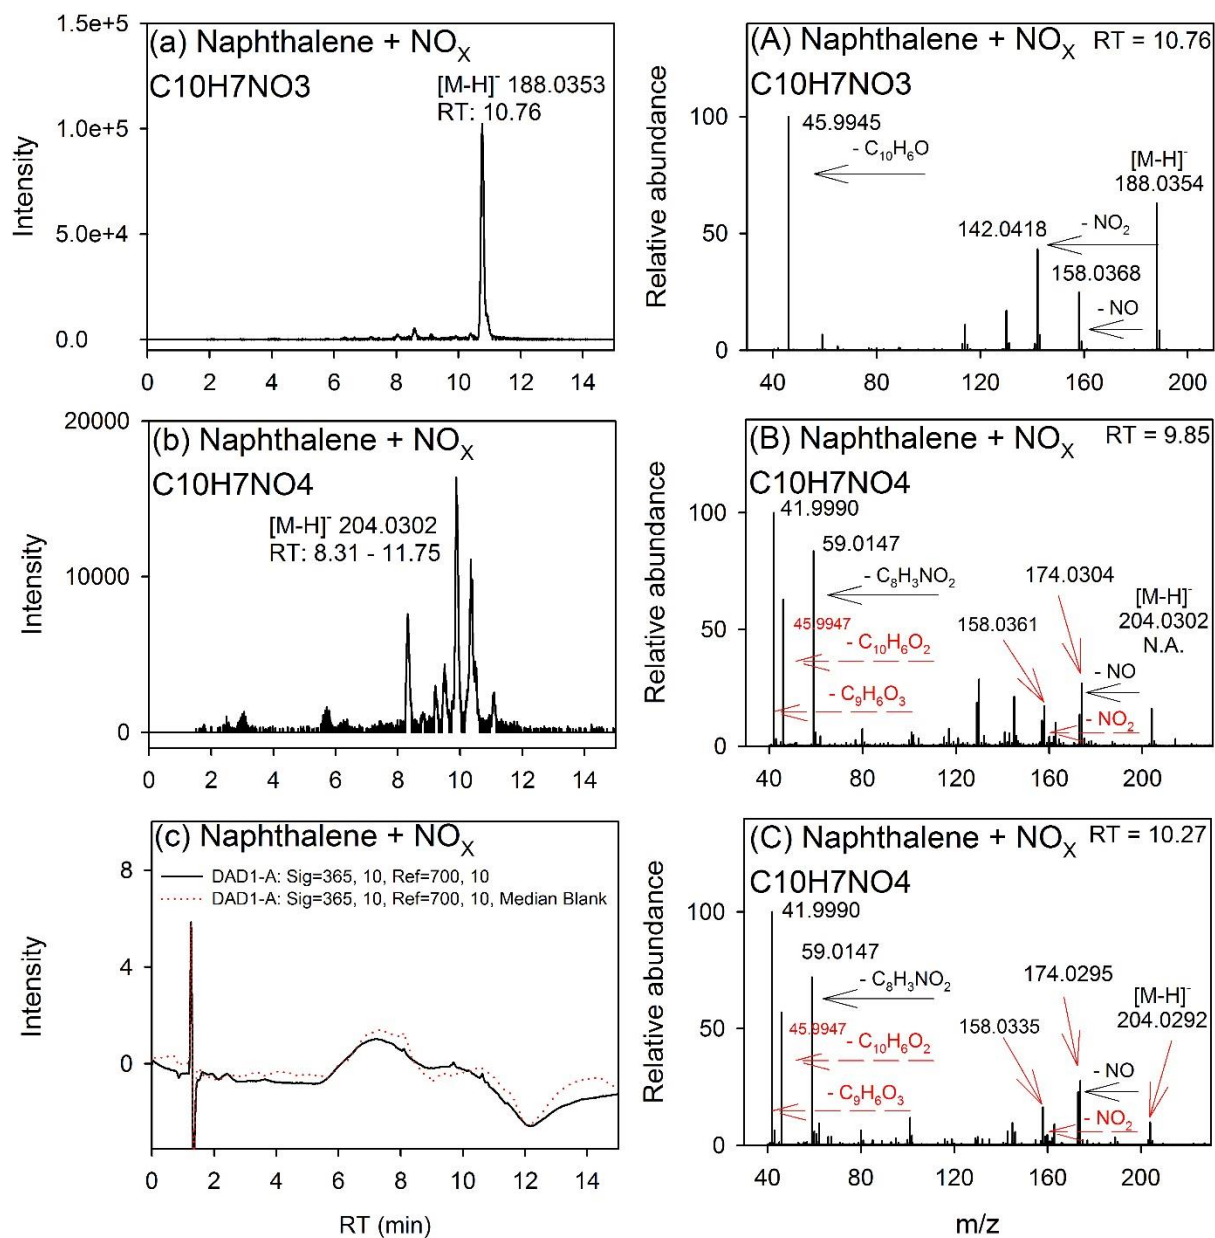

Figure S5. Extracted ion chromatograms (EICs) and Q-ToF MS/MS spectra of the C<sub>10</sub>H<sub>7</sub>NO<sub>3</sub> (a, A) and C<sub>10</sub>H<sub>7</sub>NO<sub>4</sub> (b, B, C) compounds generated from naphthalene/NO<sub>x</sub> reaction (Sample 703 GF2), and (c) UV/Vis detector chromatogram (DAD signal) for this sample.



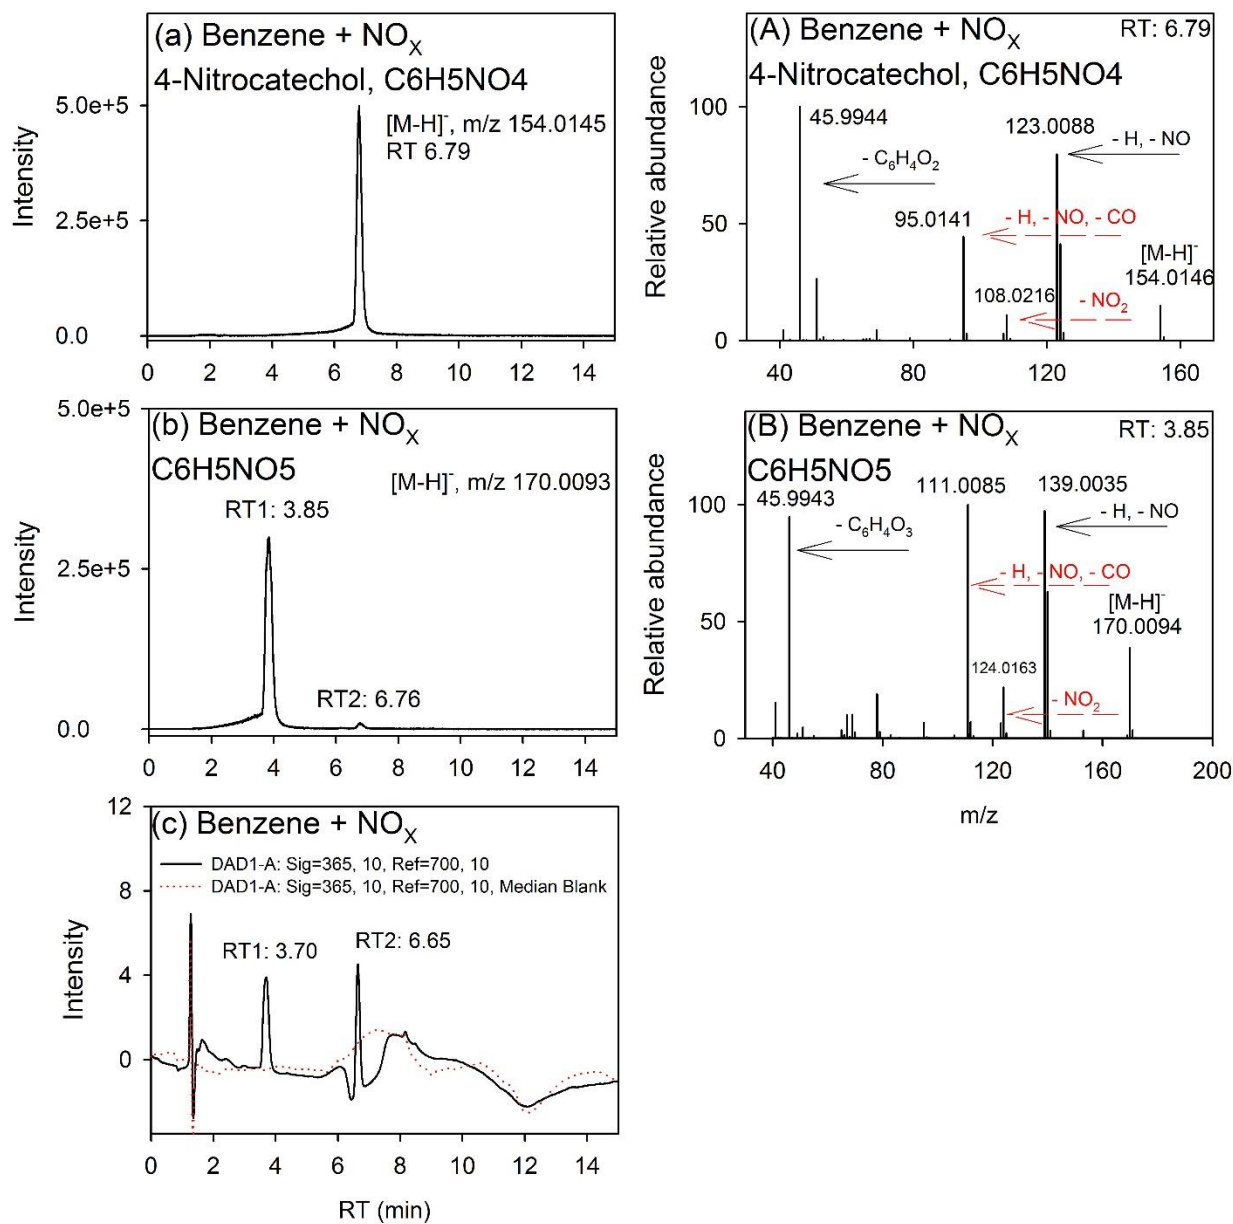

Figure S6. Extracted ion chromatograms (EICs) and Q-ToF MS/MS spectra of the  $\text{C}_6\text{H}_5\text{NO}_4$  (a, A) and  $\text{C}_6\text{H}_5\text{NO}_5$  (b, B) compounds generated from benzene/ $\text{NO}_x$  reaction (Sample ER542 GF4), and (c) UV/Vis detector chromatogram (DAD1) for this sample.

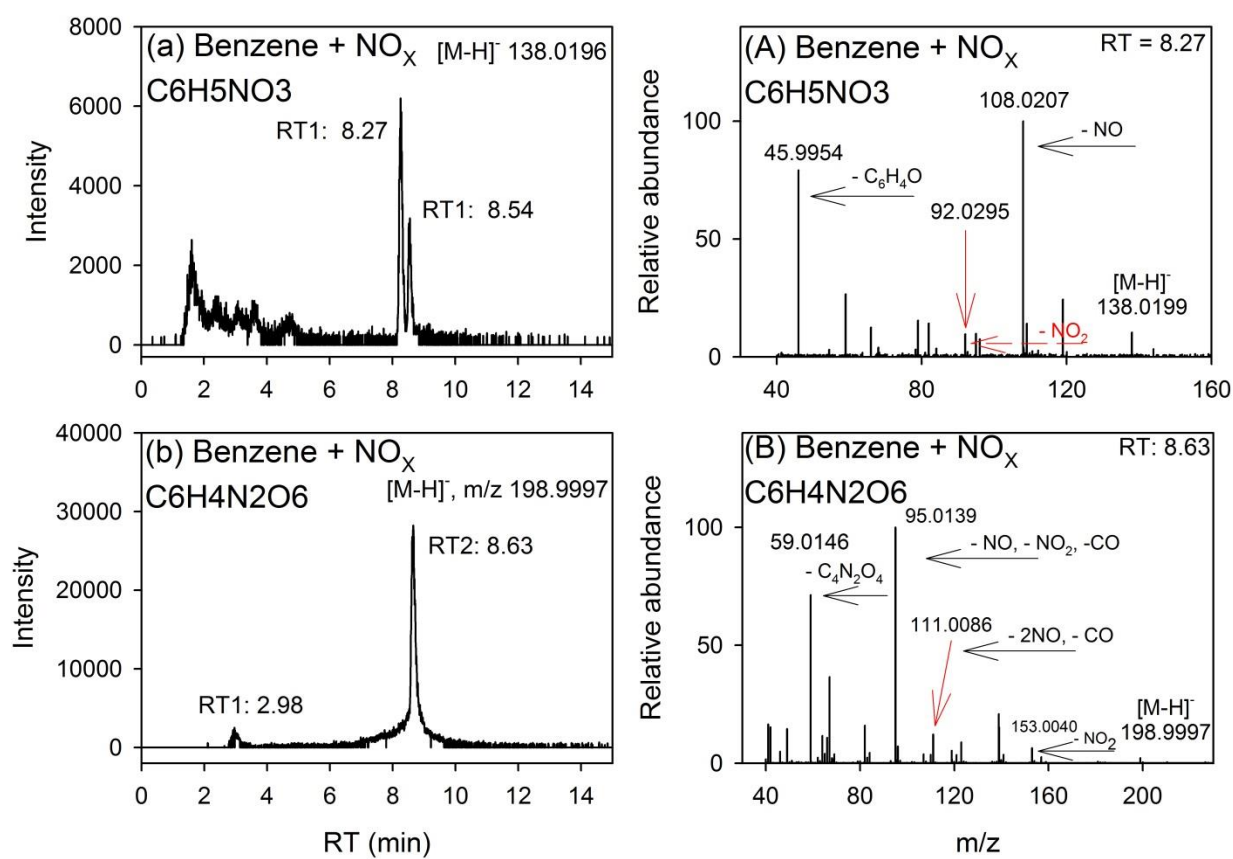

Figure S7. Extracted ion chromatograms (EICs) and Q-ToF MS/MS spectra of the  $C_6H_5NO_3$  (a, A) and  $C_6H_4N_2O_6$  (b, B) compounds generated from benzene/ $NO_x$  reaction (Sample ER542 GF4).

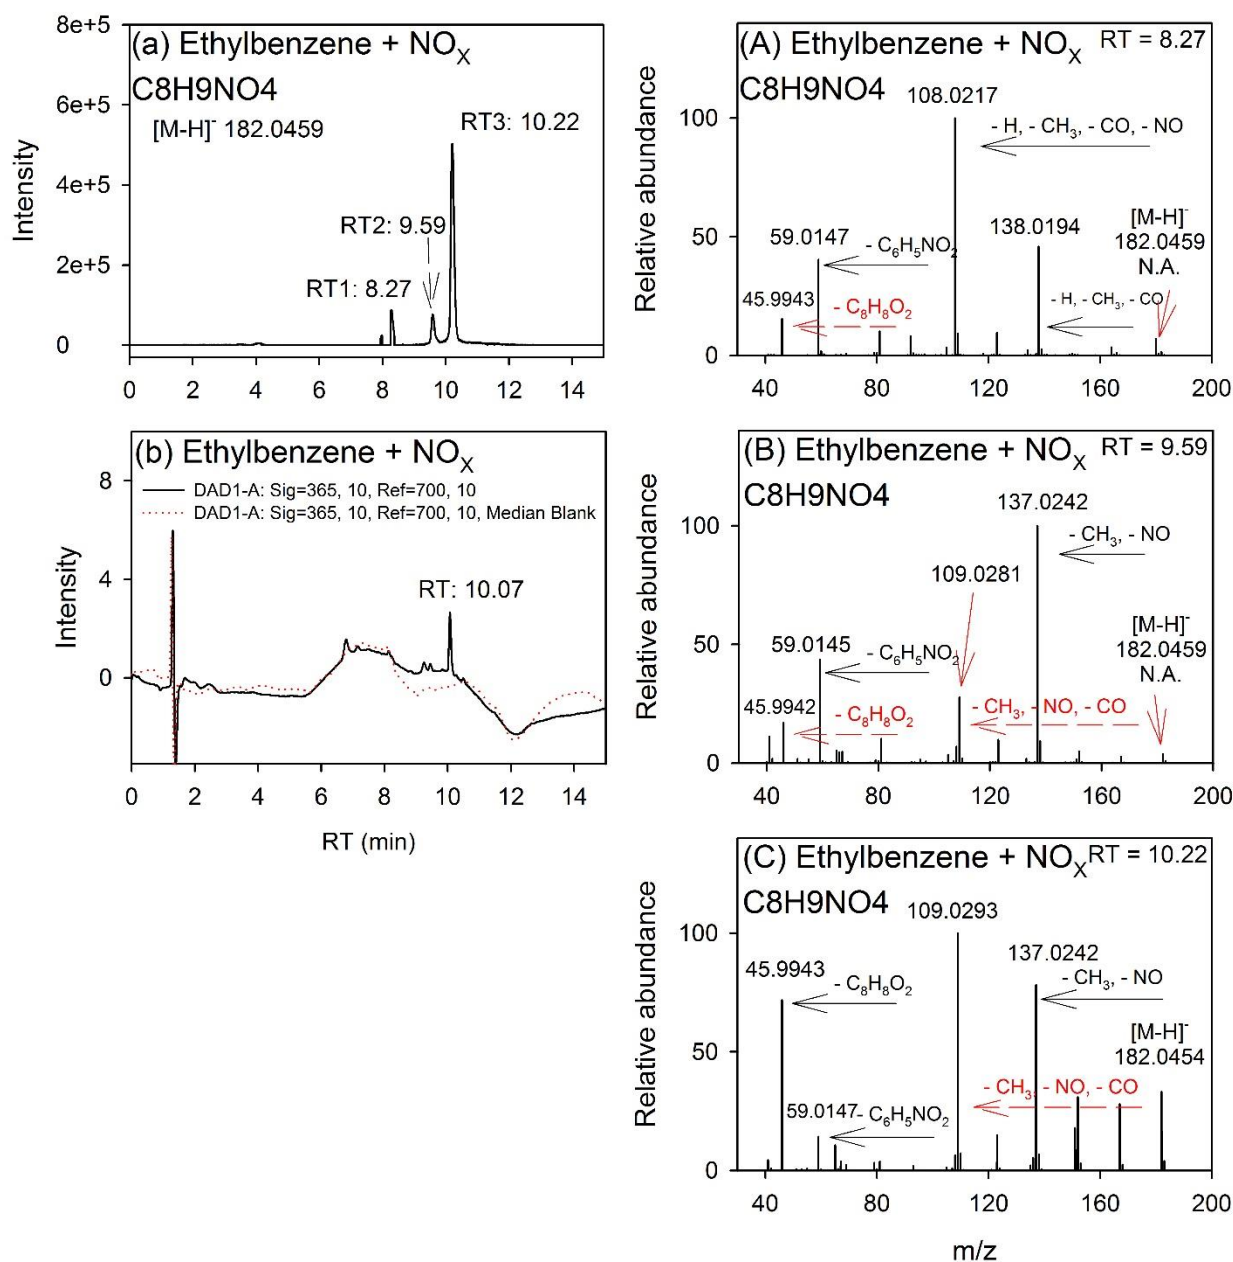

Figure S8. Extracted ion chromatogram (EIC) and Q-ToF MS/MS spectra of the C<sub>8</sub>H<sub>9</sub>NO<sub>4</sub> (a, A-C) compounds generated from ethylbenzene/NO<sub>x</sub> reaction (Sample ER754 GF8), and (b) UV/Vis detector chromatogram (DAD signal) for this sample.

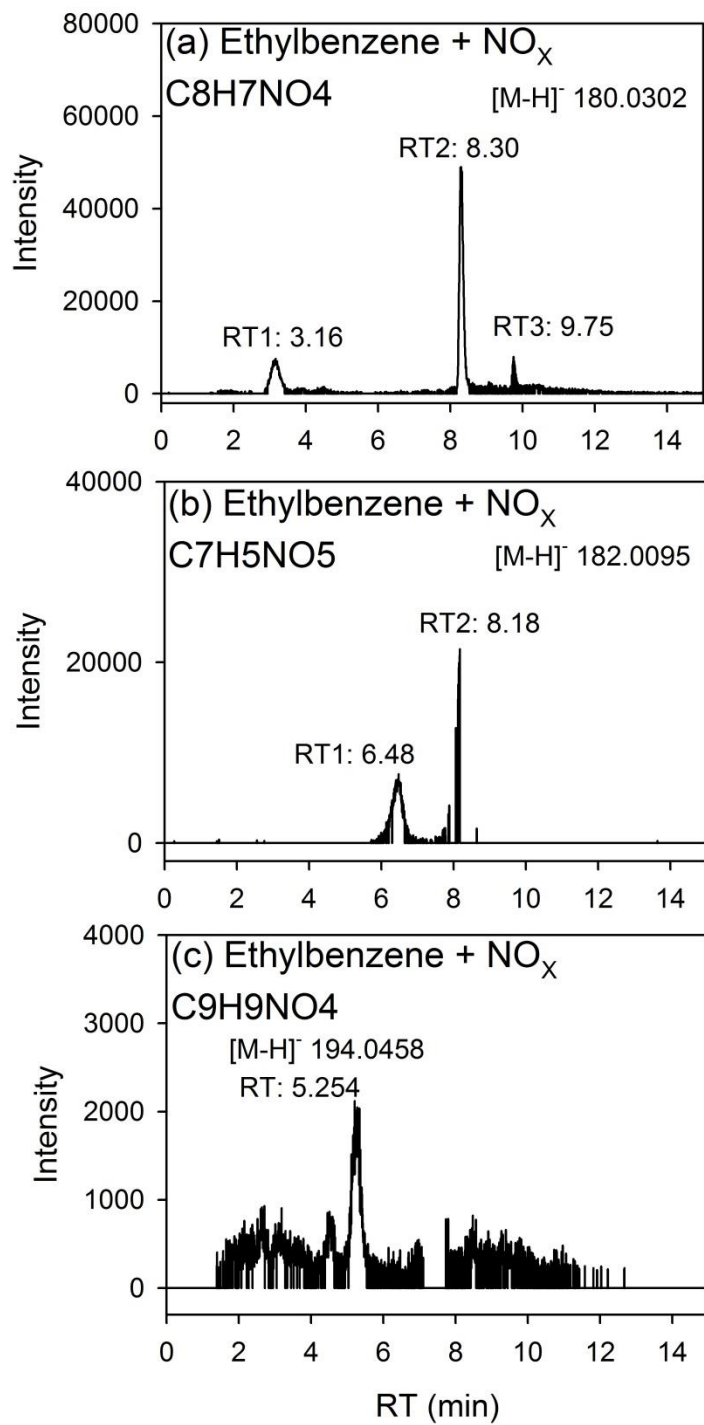

Figure S9. Extracted ion chromatograms (EICs) of (a) C<sub>8</sub>H<sub>7</sub>NO<sub>4</sub>, (b) C<sub>7</sub>H<sub>5</sub>NO<sub>5</sub>, and (c) C<sub>9</sub>H<sub>9</sub>NO<sub>4</sub> generated from ethylbenzene/NO<sub>x</sub> reaction (Sample ER754 GF8).

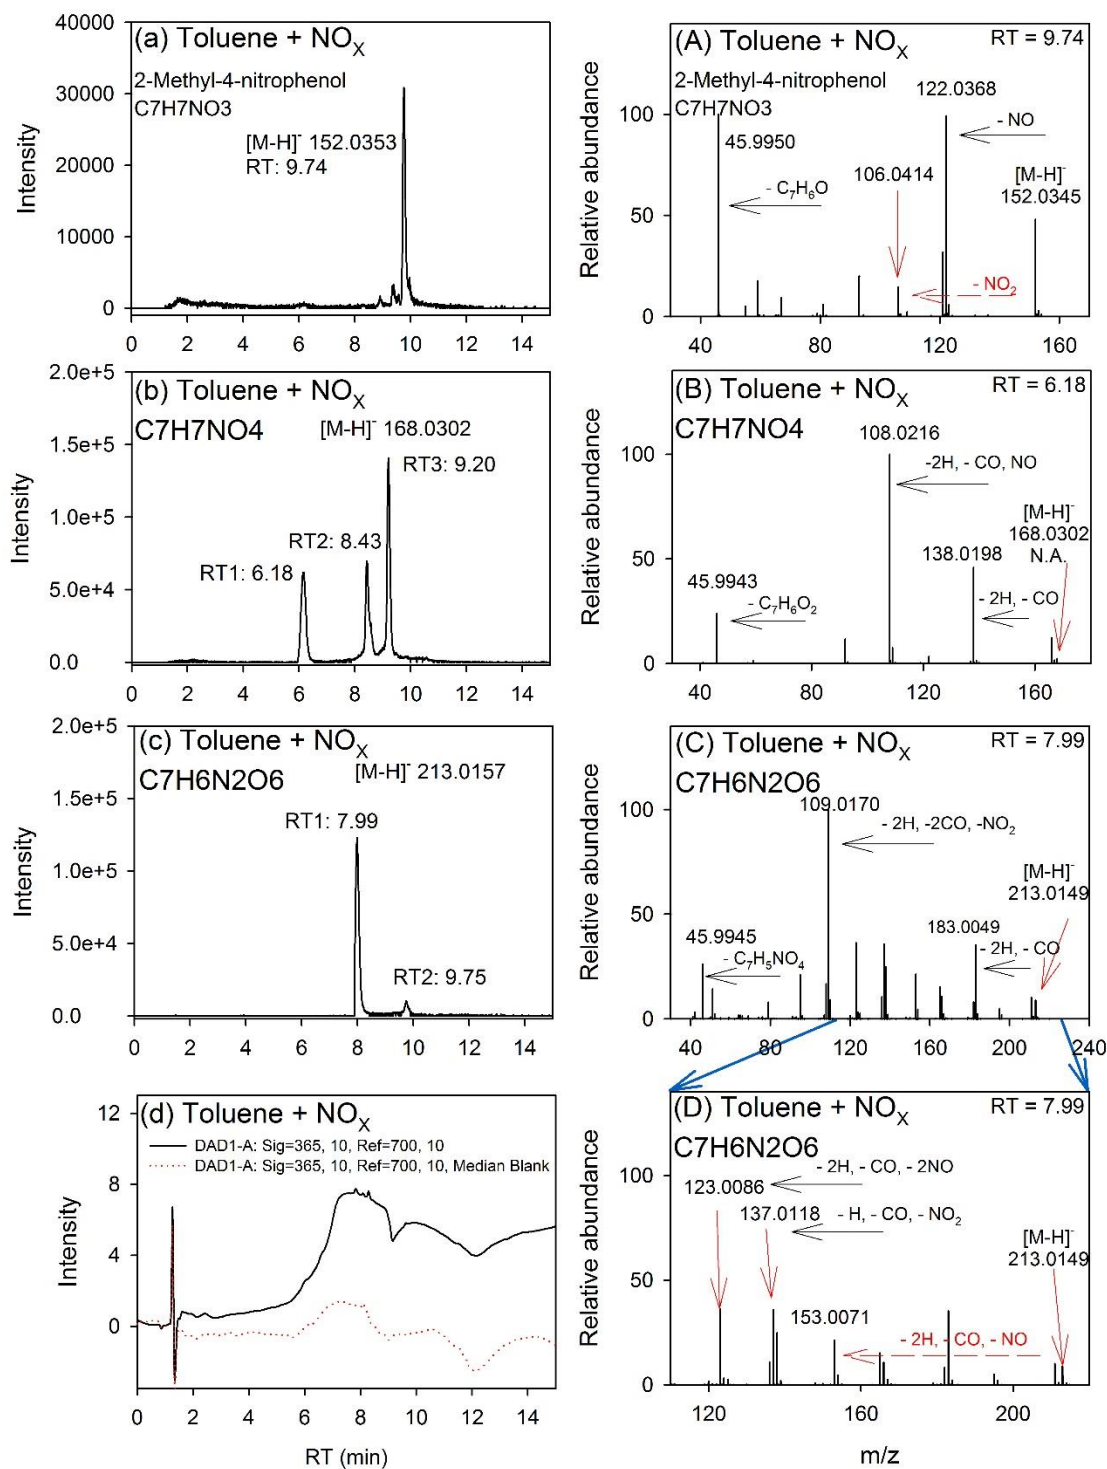

Figure S10. Extracted ion chromatograms (EICs) and Q-ToF MS/MS spectra of the  $\text{C}_7\text{H}_7\text{NO}_3$  (a, A),  $\text{C}_7\text{H}_7\text{NO}_4$  (b, B; MS/MS spectrum for compound eluting at 6.18 min), and  $\text{C}_7\text{H}_6\text{N}_2\text{O}_6$  (c, C, D) compounds generated from toluene/ $\text{NO}_x$  reaction (Sample ER744 GF2), and (d) UV/Vis detector chromatogram (DAD sample) for this sample. Plot D is a magnification from m/z 110 to 220 of plot B.

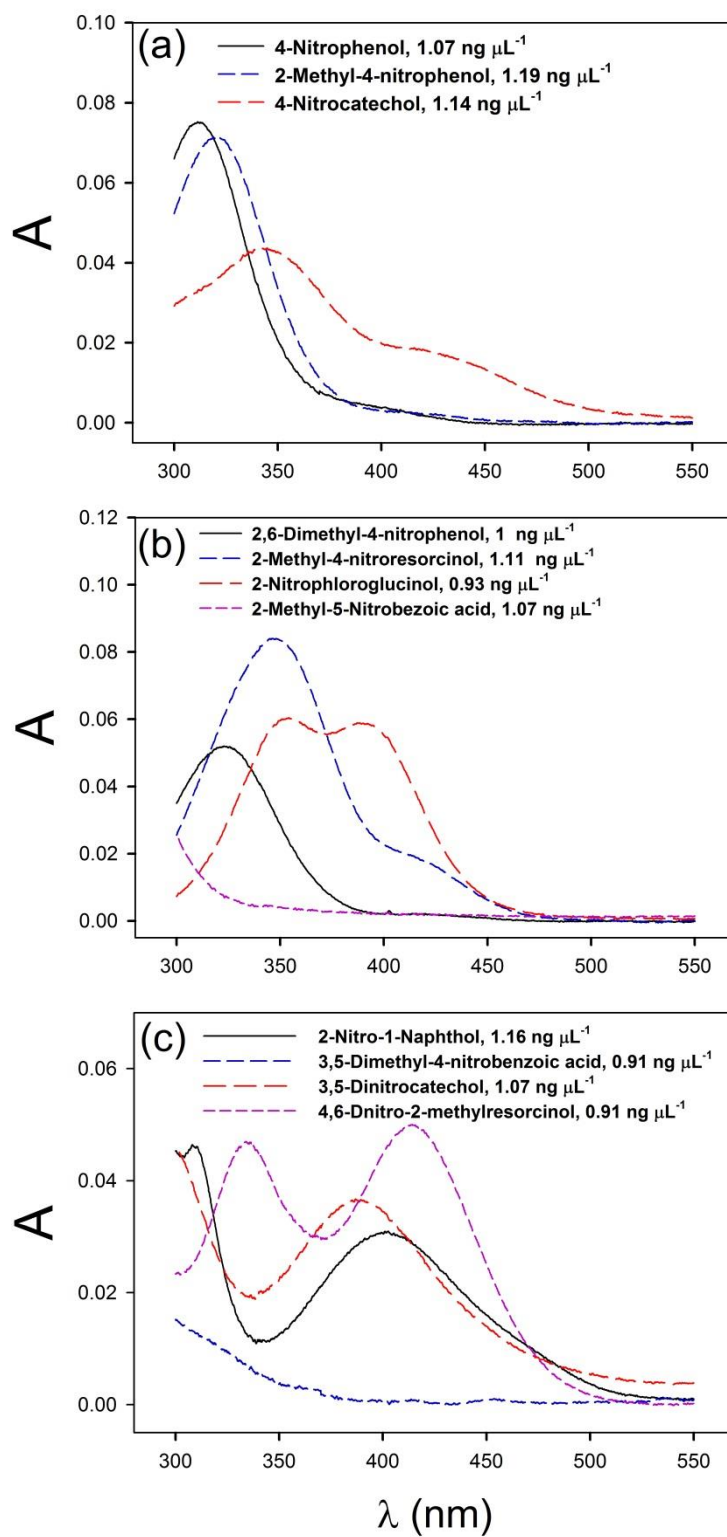

Figure S11. UV/Vis spectra ( $A_{300-550} - A_{700}$ ) of standard compounds in methanol at around 1 ng  $\mu\text{L}^{-1}$ .

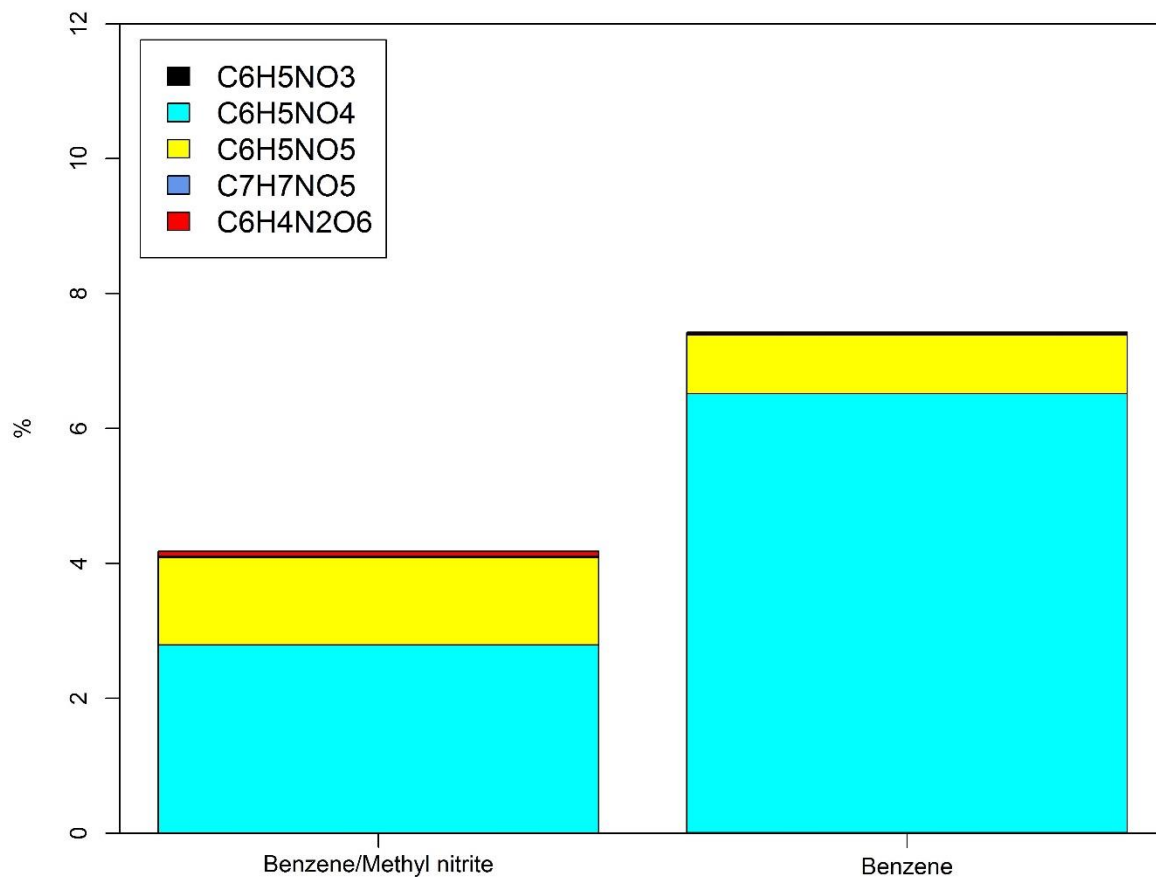

Figure S12. Average mass contributions (%) of nitro-aromatic compounds to total SOA generated from benzene/ $\text{NO}_x$  experiment under two different conditions. Four samples were collected from reactions with methyl nitrite, and the other four were collected from reactions without methyl nitrite.

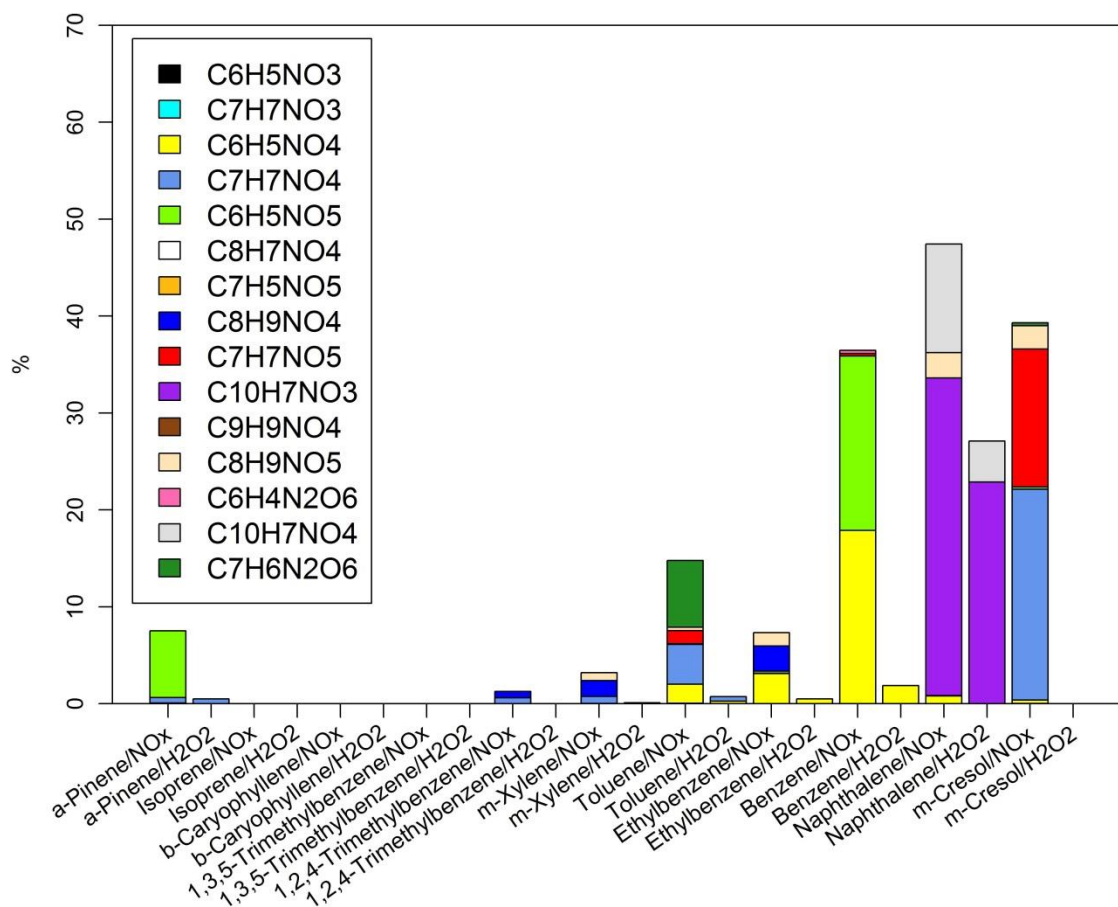

Figure S13. Average contributions (%) of nitro-aromatic compounds to Abs<sub>400</sub> of total SOA generated in different chamber experiments.



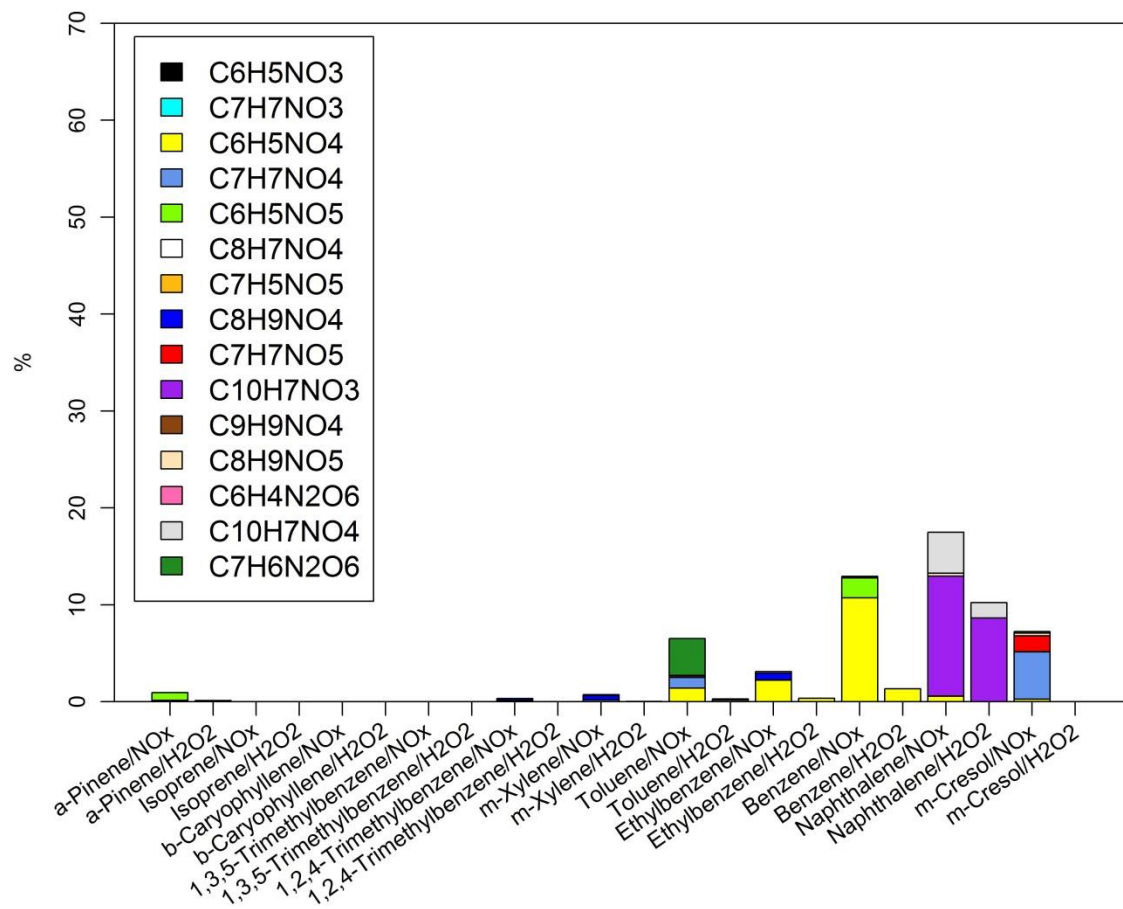

Figure S14. Average contributions (%) of nitro-aromatic compounds to Abs<sub>450</sub> of total SOA generated in different chamber experiments.

## References

- (1) Chen, Y.; Bond, T. C. Light absorption by organic carbon from wood combustion. *Atmos. Chem. Phys.* **2010**, *10* (4), 1773-1787.
- (2) Updyke, K. M.; Nguyen, T. B.; Nizkorodov, S. A. Formation of brown carbon via reactions of ammonia with secondary organic aerosols from biogenic and anthropogenic precursors. *Atmos. Environ.* **2012**, *63*, 22-31.
- (3) Cheng, Y.; He, K.-b.; Du, Z.-y.; Engling, G.; Liu, J.-m.; Ma, Y.-l.; Zheng, M.; Weber, R. J. The characteristics of brown carbon aerosol during winter in Beijing. *Atmos. Environ.* **2016**, *127*, 355-364.
- (4) Feng, Y.; Ramanathan, V.; Kotamarthi, V. R. Brown carbon: a significant atmospheric absorber of solar radiation? *Atmos. Chem. Phys.* **2013**, *13* (17), 8607-8621.
- (5) Wang, X.; Heald, C. L.; Ridley, D. A.; Schwarz, J. P.; Spackman, J. R.; Perring, A. E.; Coe, H.; Liu, D.; Clarke, A. D. Exploiting simultaneous observational constraints on mass and absorption to estimate the global direct radiative forcing of black carbon and brown carbon. *Atmos. Chem. Phys.* **2014**, *14* (20), 10989-11010.
- (6) Liu, J.; Lin, P.; Laskin, A.; Laskin, J.; Kathmann, S. M.; Wise, M.; Caylor, R.; Imholt, F.; Selimovic, V.; Shilling, J. E., Optical properties and aging of light-absorbing secondary organic aerosol. *Atmos. Chem. Phys.* **2016**, *16* (19), 12815-12827.
- (7) Lu, Z.; Streets, D. G.; Winijkul, E.; Yan, F.; Chen, Y.; Bond, T. C.; Feng, Y.; Dubey, M. K.; Liu, S.; Pinto, J. P.; Carmichael, G. R. Light absorption properties and radiative effects of primary organic aerosol emissions. *Environ. Sci. Technol.* **2015**, *49* (8), 4868-4877.
- (8) Turpin, B. J.; Lim, H.-J. Species contributions to PM<sub>2.5</sub> mass concentrations: Revisiting common assumptions for estimating organic mass. *Aerosol Sci. Tech.* **2001**, *35* (1), 602-610.
